# Supplementary material for: Quantifying the effect of nanosheet dimensions on the piezoresistive response of printed graphene nanosheet networks
Source: Royal Society of Chemistry journal article supplement (doi:10.1039/d4nh00224e), 2024-01-01
Supplement: d4nh00224e1.xlsx [file d4nh00224e1.xlsx]

## Sheet: Fig1C
Wavelength	A/A_750	A/A_750	A/A_750	A/A_750	A/A_750	A/A_750
nm
	0.5-1k	1-1.5k	1.5-2k	2-3k	3-4k	4-6k
	--	--	--	--	--	--
1000	1.03005	0.99007	0.97258	0.96832	0.97392	0.92995
999.502	0.98888	0.99313	1.01047	0.98024	0.9925	0.9405
999.002	0.99464	0.99516	0.9532	0.96489	0.92578	0.90857
998.501	1.03098	0.99298	0.98759	0.99524	0.98941	0.95166
998.001	1.00874	1.01636	1.00067	1.00294	1.00165	0.98094
997.5	1.00638	0.99259	0.96894	0.99937	0.94253	0.97217
996.999	1.02964	0.99502	0.96912	0.98289	0.96369	0.9422
996.498	0.99157	0.98463	0.96153	0.98137	0.99721	0.96258
995.997	1.00792	1.00798	0.97884	0.97724	0.96211	0.96329
995.496	1.0191	0.98737	0.9668	0.99153	0.98158	0.94543
994.994	1.01475	0.98624	0.97065	0.98706	0.95366	0.95643
994.493	1.00552	0.99091	0.98231	0.99982	0.97871	0.94645
993.991	1.01166	0.98625	0.96729	0.98938	0.98776	0.97287
993.489	1.00093	0.99479	0.96987	0.99247	0.96839	0.95306
992.987	1.00529	0.98973	0.96994	0.98045	0.98116	0.9576
992.485	1.00351	0.98687	0.9775	0.99735	0.9731	0.9705
991.982	0.99709	0.98122	0.96361	0.98762	0.96696	0.94609
991.48	1.03106	0.98726	0.97509	0.97654	0.97261	0.96328
990.977	0.99808	0.98175	0.98084	0.99756	0.97901	0.94301
990.474	0.98717	0.97991	0.98476	0.96823	0.97598	0.9347
989.971	0.99785	0.98488	0.9749	0.9952	0.9727	0.9654
989.468	1.00135	1.00138	0.95718	0.97316	0.97413	0.97553
988.965	1.04805	1.05179	0.98981	1.00776	1.02143	0.98157
988.461	1.01642	0.98114	0.98345	0.9922	1.00949	0.95136
987.958	1.01617	0.99375	0.99218	0.99028	0.99632	0.97504
987.454	1.008	0.98091	0.95984	0.99012	0.95025	0.95233
986.95	1.00988	0.97531	0.95674	1.00171	0.98537	0.9541
986.446	1.0481	1.01492	0.99757	1.00021	0.9807	0.97305
985.942	1.04254	1.0217	0.96649	0.97584	0.99024	0.95797
985.438	0.97405	0.97673	0.98356	0.96628	1.00559	0.91382
985.059	1.0061	0.99142	0.99647	0.99544	0.97534	0.98469
984.555	0.96884	1.01569	0.97654	1.00035	0.98293	0.96998
984.05	1.02519	0.99194	0.98388	0.95206	0.95251	0.95632
983.545	0.99207	1.00383	0.94441	0.98009	0.97796	0.95549
983.04	1.02079	0.98724	0.96984	0.97034	0.986	0.99099
982.535	1.01946	0.98694	0.94563	0.99618	0.94946	0.94595
982.029	1.02179	0.98333	0.968	0.98014	0.98093	0.95762
981.524	0.99576	0.97516	0.96969	0.98161	0.97096	0.95342
981.018	1.01218	0.99554	0.97743	0.98335	0.97045	0.9618
980.512	0.99712	0.98548	0.97955	0.98977	0.97228	0.96912
980.006	1.00809	0.99152	0.97357	0.98983	0.99176	0.95678
979.5	1.00135	0.98209	0.97174	0.98681	0.9673	0.95373
978.994	1.00742	0.99021	0.97172	0.99375	0.98376	0.95914
978.487	1.00877	0.98274	0.9728	0.97798	0.97184	0.96055
977.981	1.01718	0.99656	0.96894	1.00267	0.99606	0.93389
977.474	1.01306	0.99142	0.97424	0.97655	0.97236	0.96963
976.967	1.01799	0.9976	0.97972	1	0.97824	0.96053
976.46	0.99809	0.98573	0.99237	0.98063	0.99173	0.95758
975.953	0.99903	1.00955	0.97626	0.98142	0.96847	0.96383
975.445	1.023	1.01581	0.97237	1.0064	0.98796	0.97497
974.938	1.00741	0.97607	0.96473	0.9611	0.96965	0.94966
974.557	1.03909	0.99983	1.00448	0.97898	0.97668	0.97831
974.049	1.00953	0.9868	0.98283	0.99153	0.97753	0.91699
973.542	1.01265	0.96969	0.96314	0.98356	0.96909	0.96947
973.034	0.99814	1.00134	0.95408	0.99516	0.95554	0.97579
972.525	1.01775	0.9953	0.99813	1.00105	0.96191	0.95351
972.017	1.00848	0.99225	0.96584	0.97971	0.99154	0.94377
971.508	1.00514	1.0079	0.99998	0.98681	0.99659	0.96961
971	0.99746	0.9622	0.95531	0.96014	0.95752	0.95465
970.491	1.052	1.00916	0.97931	1.01596	0.98923	0.97199
969.982	1.00624	0.98663	0.96753	0.99183	0.98046	0.96321
969.473	0.98398	0.9819	0.98067	0.97077	0.97309	0.94738
968.964	0.99626	0.98076	0.98446	0.97342	0.96313	0.93025
968.454	1.00551	1.0197	0.99182	1.00588	0.99092	0.96799
967.945	1.01412	0.98148	0.98939	0.9845	0.98042	0.94244
967.562	1.00829	1.00915	0.95644	0.97215	0.9735	0.92606
967.053	0.9923	0.98405	0.98945	0.97586	1.00351	0.96204
966.543	1.01023	0.99295	0.9564	0.9706	0.94209	0.96632
966.033	1.03631	0.998	1.00095	1.01701	1.01632	0.95336
965.522	1.01186	0.97679	0.95646	0.97224	0.97256	0.93934
965.012	1.02317	0.98964	0.96959	0.96793	0.95996	0.96883
964.501	1.00279	1.00274	0.95999	0.99413	0.97022	0.95337
963.991	1.01374	0.98517	0.99914	1.00796	0.98809	0.98433
963.48	0.99501	0.96104	0.96129	0.94343	0.9636	0.93567
962.969	1.01055	0.98121	0.94662	0.95396	0.98041	0.96298
962.458	1.00443	0.96631	0.96387	0.98906	0.96885	0.92822
961.946	0.98633	1.00193	0.98161	0.98063	0.94159	0.96741
961.563	1.00552	0.98794	0.99487	0.98522	0.97398	0.98691
961.051	1.00643	0.99987	0.98348	1.00103	0.95461	0.95701
960.539	0.98967	0.98961	0.95491	0.97243	0.96031	0.95795
960.028	1.00472	0.99703	0.98413	0.99823	0.99093	0.96214
959.516	0.99713	0.98068	0.97285	0.99017	0.98821	0.95283
959.003	1.00736	0.95816	0.97691	0.97807	0.97633	0.95285
958.491	0.99044	0.98919	0.97069	0.98612	0.97678	0.94951
957.979	1.00539	0.98331	0.96315	0.99245	0.95603	0.96232
957.466	0.9905	0.99458	0.97603	0.99138	0.96911	0.97217
956.953	1.00462	0.98794	0.96394	0.99052	0.97317	0.9344
956.441	0.99182	0.98201	0.97876	0.98584	0.9944	0.96065
956.056	0.9799	0.99646	0.98108	0.99139	0.97469	0.9566
955.543	1.00112	0.99005	0.96462	0.96612	0.963	0.95247
955.029	1.00414	0.99244	0.97652	0.97224	1.00325	0.95071
954.516	0.97985	0.98586	0.98141	0.98902	0.96959	0.9693
954.002	1.00168	0.98587	0.9737	0.97039	0.95997	0.96149
953.489	0.99427	0.98882	0.97495	0.97752	0.95054	0.94021
952.975	1.00631	1.01929	0.97146	0.98622	0.98339	0.9635
952.461	0.99092	0.98805	0.98444	0.98908	0.962	0.95986
951.946	1.00205	0.99576	0.9916	0.98386	0.99593	0.94747
951.561	0.99349	0.97477	0.97573	0.9631	0.9538	0.94064
951.046	1.0046	0.98832	0.98651	0.96998	0.98832	0.94936
950.532	0.99954	0.98408	0.98175	0.97395	0.97084	0.96301
950.017	1.0045	0.99627	0.97307	0.97463	0.97783	0.94418
949.502	1.02118	1.00102	0.98999	0.96946	0.97314	0.95528
948.987	1.02179	0.98401	0.98688	0.98608	0.97178	0.94647
948.472	0.99809	0.96475	0.97275	0.97626	0.96471	0.95543
947.957	1.01593	1.00554	1.00601	0.98304	0.98869	0.96725
947.441	1.00412	1.00338	0.97065	0.98096	0.98322	0.95635
947.054	0.99602	1.00073	0.97462	0.99571	0.96807	0.9625
946.539	1.00317	0.99661	0.98564	0.97791	0.99141	0.95938
946.023	1.00343	0.99799	0.97366	0.97101	0.99389	0.95639
945.507	0.98489	0.99234	0.97596	0.98459	0.97232	0.95173
944.991	1.00344	1.00575	0.97794	0.96601	0.96608	0.94702
944.474	1.00248	0.98811	0.97653	0.95717	0.96367	0.95187
943.958	1.02364	1.00198	0.97664	0.97617	0.97167	0.96222
943.441	0.98724	0.9979	0.97955	0.96695	0.99677	0.94868
943.054	0.99043	0.98002	0.9745	0.97718	0.96249	0.95054
942.537	1.00923	0.99091	0.97557	0.98855	0.96594	0.94645
942.02	0.98911	1.00336	0.98062	0.99703	0.96984	0.96424
941.503	0.99081	0.99207	0.97978	0.98073	0.98115	0.94846
940.986	1.00875	0.98692	0.98542	0.97168	0.97881	0.96308
940.468	1.00352	1.00029	0.98436	0.99164	0.98259	0.96088
939.951	1.0013	0.99614	0.98363	0.98013	0.99845	0.95622
939.562	0.99748	0.99453	0.97748	0.97221	0.96626	0.94981
939.045	0.99165	0.98638	0.97447	0.98633	0.96965	0.94631
938.527	1.0046	1.00745	0.98667	0.9876	0.9645	0.9538
938.009	1.00334	1.00378	0.98696	0.98919	0.98868	0.96269
937.49	1.00466	1.00098	0.97844	0.98298	0.98522	0.96126
936.972	1.02029	0.99362	0.98421	0.97915	0.96518	0.95041
936.453	1.00788	1.00447	0.9785	0.98463	0.97597	0.96239
936.064	1.00163	0.98177	0.99036	0.99074	0.97269	0.94062
935.546	1.01296	1.00936	0.99535	0.99509	0.99991	0.96628
935.027	1.02806	1.00317	0.98032	1.01187	0.99415	0.96322
934.508	1.00169	1.00462	0.99377	0.97641	0.9987	0.96289
933.988	0.99602	0.98369	0.97731	0.98759	0.95858	0.95252
933.469	1.00524	1.02065	0.99822	0.9895	0.98883	0.98094
932.949	1.00533	0.98561	0.97082	0.99948	0.99182	0.95525
932.56	1.00666	0.98798	0.98776	1.00207	0.97238	0.9547
932.04	0.98988	1.00106	0.97547	0.97341	0.97947	0.95716
931.52	0.99394	1.01779	0.99334	1.00149	0.96404	0.95775
931	0.9983	0.9849	0.97337	0.94517	0.97749	0.95837
930.48	0.99341	0.99713	0.96997	0.97101	0.97334	0.94979
929.959	0.9922	1.00963	0.98505	0.97452	0.98834	0.9492
929.439	1.00281	0.98873	0.98121	0.98571	0.96281	0.95757
929.049	0.99556	1.00306	0.97823	0.98617	0.98958	0.97257
928.528	1.00242	0.99994	0.98123	0.98922	0.96035	0.95543
928.007	0.99108	0.99675	0.99545	0.98318	0.98574	0.96186
927.486	0.99094	0.98703	0.98618	0.99954	0.9775	0.96329
926.965	0.99109	1.00516	0.98236	0.97991	0.96899	0.95721
926.443	1.02199	1.00434	0.9805	0.99192	1.00207	0.965
926.052	1.00317	1.00779	0.9828	0.9844	0.97278	0.96868
925.531	1.00604	0.99925	0.98167	0.98303	0.99982	0.97774
925.009	0.98621	1.00064	0.97425	1.00541	0.98097	0.94591
924.487	1.01662	1.01486	0.98643	0.97846	0.95859	0.95725
923.965	1.01444	1.01431	0.99808	0.99238	0.98197	0.96904
923.443	0.99539	1.01745	0.9998	1.00347	0.97985	0.97353
923.051	0.9823	1.00443	0.99252	0.9712	0.97985	0.95515
922.529	0.97704	0.99412	0.97702	0.98283	0.97608	0.95237
922.007	0.99402	0.9943	0.98736	0.98497	0.98265	0.96555
921.484	0.99626	1.00402	0.98326	0.98627	0.98463	0.94342
920.961	1.01022	1.00768	0.98315	0.99543	1.00274	0.96065
920.438	0.99807	0.99095	0.9858	0.98296	0.99171	0.96413
920.046	1.00433	0.9949	0.98545	0.99127	0.9826	0.97592
919.523	0.98834	0.98927	0.98375	0.97112	0.97013	0.95899
918.999	1.00146	0.99202	0.99295	0.98892	0.97897	0.96841
918.476	0.99942	0.99784	0.98629	0.98228	0.9791	0.9595
917.952	1	1.00012	0.97911	0.98518	0.98182	0.96066
917.559	1.00542	1.00117	0.98322	0.98638	0.98359	0.96457
917.036	0.9971	1.00249	0.9832	0.99764	0.98153	0.96568
916.512	0.99145	0.99649	0.98246	0.98889	0.97351	0.96858
915.987	1.00224	0.98659	0.98107	0.99209	0.97972	0.95194
915.463	0.99216	1.00248	0.98596	0.99564	0.98463	0.9687
914.939	0.98858	0.99367	0.97539	0.99162	0.98793	0.95943
914.545	0.99908	0.99623	0.97765	0.97734	0.9713	0.95438
914.021	1.02257	1.01753	0.9939	1.00843	0.99033	0.96862
913.496	0.99735	0.98943	0.98338	0.97601	0.99254	0.94108
912.971	0.99837	0.99145	0.97947	0.97497	0.97071	0.9566
912.446	0.99168	0.99496	0.9828	0.98578	0.99103	0.96607
912.052	1.00968	0.9956	0.99036	0.99516	0.97991	0.95468
911.526	1.00071	1.00404	0.97579	0.97901	0.95763	0.95078
911.001	0.99507	0.99049	1.00099	0.98643	0.96524	0.95137
910.475	0.99872	1.01212	0.99721	0.9761	0.99556	0.96496
909.95	1.00543	0.9937	0.99157	0.988	0.98606	0.95314
909.555	0.9966	0.98637	0.99391	0.98363	0.9679	0.97043
909.029	0.98925	0.99768	0.96675	0.98747	0.98063	0.95484
908.503	0.98642	0.99006	0.98843	0.98936	0.97805	0.95706
907.977	1.00371	0.99829	0.98017	0.98713	0.9858	0.9518
907.45	1.00307	0.99419	0.98386	0.98606	0.96987	0.96295
907.055	0.99397	0.99361	0.96737	0.9747	0.97195	0.95598
906.529	0.99526	0.99075	0.97909	0.97728	0.99047	0.95482
906.002	0.99428	1.01262	0.97765	0.99285	0.98051	0.97663
905.475	1.00264	1.00001	0.98813	0.9877	0.97872	0.96471
904.948	0.99727	1.00032	0.98741	0.99193	0.99206	0.96308
904.552	0.99601	0.99697	0.98529	0.98724	0.98305	0.96005
904.025	0.98948	1.00166	0.98422	0.99062	0.99034	0.96282
903.498	0.99552	1.01043	0.97792	0.98873	0.98666	0.9612
902.97	1.00638	1.00625	0.97805	0.99083	0.98183	0.95955
902.442	0.99669	0.97453	0.98303	0.98146	0.98177	0.9652
902.046	1.01307	1.00822	0.98773	0.98862	0.96791	0.94744
901.518	1.00219	1.00637	0.98183	0.98199	0.98022	0.97651
900.99	0.98519	0.99296	0.97411	0.98071	0.96915	0.96618
900.462	1.00625	1.01067	0.98751	0.98644	0.97765	0.95575
900.066	1.00502	1.01165	0.98859	0.99581	0.98657	0.97001
899.537	1.00327	0.99998	0.98547	0.98516	0.97852	0.95723
899.008	1.00536	0.99649	0.98598	0.97455	0.96922	0.95776
898.48	1.00129	1.00621	0.97141	0.98696	0.97373	0.96559
897.951	0.99082	0.99056	0.9822	0.9871	0.97933	0.9666
897.554	0.98355	1.00705	0.98155	0.98451	0.98257	0.97118
897.025	0.97931	1.00887	0.97407	0.98566	0.98936	0.95602
896.495	0.99197	0.99837	0.98012	0.98016	0.97862	0.94852
895.966	0.99067	0.99794	0.98265	0.98544	0.97712	0.95315
895.436	1.00579	1.01614	0.99221	0.99065	0.99695	0.97128
895.039	0.9992	1.00134	0.98937	1.00894	0.98164	0.95431
894.509	0.99892	1.00291	0.99324	0.99423	0.98897	0.95251
893.979	1.00708	0.99942	0.98237	1.00322	0.99646	0.96665
893.449	1.00586	0.98412	0.98909	0.98173	0.98804	0.95482
893.052	0.98455	0.99494	0.98208	0.98009	0.97494	0.96146
892.521	0.98974	1.00672	0.97565	0.99059	0.98797	0.97454
891.991	0.99377	1.01168	0.99361	0.98775	0.97317	0.96458
891.46	0.99102	1.00254	0.98466	0.98936	0.97278	0.97058
891.062	1.0056	1.01127	0.98461	0.99033	1.00707	0.96264
890.531	0.99197	1.00387	0.98363	0.97739	0.98087	0.96698
890	0.98778	1.01918	0.98415	0.98271	0.98124	0.94848
889.469	0.99553	0.99359	0.98395	0.99292	0.99026	0.96457
888.938	0.98368	0.98545	0.98565	0.9889	0.97755	0.96391
888.539	0.99961	1.00881	0.98991	0.99448	0.98273	0.95932
888.008	1.00528	0.99954	0.98099	0.98583	0.98526	0.96605
887.476	0.9993	1.00627	0.97907	0.98234	0.99365	0.98716
886.944	0.99111	1.00536	0.98048	0.98008	0.98524	0.96245
886.545	0.99018	0.99692	0.98598	0.98607	0.97867	0.95393
886.013	0.99624	1.00866	0.99127	0.99317	0.97809	0.96904
885.481	0.9913	1.00841	0.98601	0.99316	0.98062	0.96142
884.949	0.99465	1.01139	0.98089	0.99431	0.99132	0.96791
884.55	1.00218	1.00904	0.97992	0.98969	0.98139	0.97921
884.017	0.99255	1.00365	0.98232	0.98986	0.98104	0.96085
883.484	0.99567	1.00712	0.98111	0.9934	0.98267	0.96385
882.952	0.99816	1.00068	0.9818	0.98791	0.98255	0.97036
882.552	0.99717	1.00542	0.98408	0.98871	0.98215	0.96445
882.019	1.00218	1.00274	0.98121	0.98906	0.98795	0.96207
881.486	0.99634	1.00947	0.98116	0.99243	0.99092	0.96953
880.952	0.99577	1.00635	0.9799	0.99039	0.98812	0.98054
880.552	0.99652	1.00294	0.98701	0.99681	0.99571	0.96517
880.019	1.00154	0.99943	0.98034	0.98555	0.98201	0.97125
879.485	0.99975	1.002	0.97544	0.98882	0.98155	0.95483
878.951	1.00031	1.0195	0.97736	1.01508	0.98392	0.96178
878.551	0.99392	1.02299	0.97756	0.99927	0.99043	0.95523
878.017	0.97897	1.0073	0.96405	0.98903	0.96726	0.95921
877.482	0.99883	1.01956	1.01346	1.01127	0.99888	0.95679
876.948	1.00359	0.98509	0.98235	0.98605	0.97187	0.95691
876.547	0.99685	1.01105	0.98753	0.99569	0.97729	0.98179
876.013	0.99887	0.97958	0.9733	0.98308	0.98224	0.96765
875.478	0.99256	0.99753	0.95954	0.98867	0.97407	0.97432
874.943	0.99214	1.00034	0.97861	0.97574	0.9823	0.95677
874.542	0.9837	0.99507	0.98956	0.95826	0.96905	0.95787
874.007	0.97931	0.99392	0.9845	0.97875	0.96364	0.9402
873.472	0.97976	0.98526	0.97572	0.98495	0.98952	0.95429
872.936	0.99388	0.99685	0.98578	0.99393	1.009	0.96135
872.535	1.00996	1.0061	0.99556	1.00596	1.00607	0.99679
871.999	0.9755	0.99726	0.98042	0.96833	0.96837	0.95397
871.463	0.99472	0.98621	0.955	0.98776	0.98788	0.95805
871.061	1.00542	1.01515	0.98798	0.99392	0.97712	0.97854
870.526	0.98531	1.01313	0.98795	0.98129	0.98422	0.97673
869.989	0.99685	0.99647	0.98414	0.98045	0.97166	0.96093
869.453	0.99964	1.00535	0.96195	0.98074	0.95707	0.98031
869.051	0.99079	1.02175	0.9901	0.97123	0.97583	0.94945
868.515	1.01685	0.99869	0.98509	0.98457	0.98293	0.96828
867.978	1.00167	1.00659	0.98344	1.00147	0.95952	0.95672
867.441	0.96724	1.02279	0.97925	1.01154	0.97711	0.95345
867.039	0.96653	0.99156	0.96936	0.98688	0.97532	0.94875
866.502	1.01111	1.00412	0.98913	0.99781	0.98445	0.9841
865.965	0.98792	1.01816	0.98804	0.97568	0.98023	0.97146
865.562	0.98718	1.02011	0.9835	0.97777	0.99195	0.96567
865.024	0.99838	0.99279	0.99479	1.00006	0.98625	0.93513
864.487	0.98345	0.98909	0.97643	0.99659	1.01544	0.96197
863.949	0.99392	1.0054	0.9729	0.99278	0.98441	0.9784
863.546	0.98914	0.96559	0.96396	0.96355	0.99022	0.93669
863.008	1.00451	0.98835	0.98706	0.98327	1.00204	0.97382
862.47	0.96965	0.99114	0.99432	0.97861	0.98627	0.94656
862.067	0.98085	0.99526	1.00909	1.00565	0.9899	1.0068
861.528	0.98162	0.99513	0.98381	0.99239	0.97337	0.95399
860.99	0.97038	0.98098	0.97626	0.97702	0.94748	0.93049
860.452	0.98084	0.9882	0.95792	0.94954	0.98545	0.95017
860.048	0.98914	1.00601	0.99265	0.97813	0.99813	0.9625
859.509	0.99952	0.9998	0.96711	0.96289	0.99303	0.9676
858.97	0.98802	0.99645	0.99761	0.96924	0.9774	0.9844
858.566	1.00615	1.00708	0.99667	0.98129	0.99018	0.961
858.027	0.99451	1.01975	0.9897	0.99078	0.99156	0.97354
857.488	0.98746	0.99732	0.98588	0.97898	0.99937	0.9626
856.948	1.00273	1.04082	0.98928	1.00023	0.97332	0.9762
856.544	0.98443	0.98655	0.97554	0.95522	0.94818	0.97026
856.004	0.98551	0.98333	0.98515	0.95653	0.95679	0.93972
855.465	0.99816	1.00105	0.98308	0.97396	0.98969	0.96387
855.06	0.98764	1.01493	0.98504	0.98212	0.98548	0.96708
854.52	0.9987	1.01138	0.98396	0.98189	0.98154	0.97231
853.98	0.99336	1.00262	0.99325	1.03343	1.01439	0.99133
853.44	1.01262	0.9919	0.99211	0.99998	1.00822	0.983
853.035	0.98284	0.97641	0.97103	0.9916	0.95752	0.95637
852.494	0.99685	1.02427	0.98937	0.99729	0.97944	0.98543
851.954	1.01082	1.01486	0.99711	0.99734	0.99466	0.95639
851.548	0.99327	0.99789	0.9715	0.96563	0.97762	0.96456
851.007	0.9842	1.00028	0.99275	0.98349	0.97442	0.94395
850.466	1.00141	0.99927	0.99846	0.99148	0.98894	0.98034
850.061	1.00006	1.00766	0.99112	0.9794	0.99799	0.96505
849.52	0.99338	0.99908	1.00155	0.99725	0.96714	0.99217
848.978	1.01761	1.0022	0.98318	1.01663	0.99815	1.00145
848.437	0.98185	0.99916	0.98721	0.99524	0.98058	0.97111
848.031	0.97532	1.01822	0.97161	0.99071	0.98875	0.97819
847.489	0.99357	1.00198	0.98169	0.97424	0.97488	0.96701
846.947	1.00727	1.00652	1.00118	0.9895	0.97924	0.93285
846.541	0.98894	0.98992	0.99126	0.9939	0.98003	0.9639
845.999	0.9736	0.99221	0.96489	0.98578	0.96596	0.97666
845.457	1.00226	1.01648	1.01003	0.97963	0.99934	0.96025
845.05	0.99179	0.99983	0.9756	0.98746	0.99512	0.94565
844.508	0.99408	0.98075	0.95333	1.00443	0.9899	0.97118
843.966	1.01105	1.00825	0.98993	0.98936	0.99839	0.97013
843.559	1.00223	1.00152	0.99102	0.97799	0.9982	0.96057
843.016	0.9942	0.99917	0.96771	0.99703	0.98855	0.96334
842.473	0.99604	0.99901	0.97321	0.9803	0.9798	0.97129
842.066	0.99881	1.0018	0.97427	0.99078	0.98193	0.95786
841.523	0.99484	0.99116	0.98115	1.00334	0.98404	0.97706
840.98	1.00924	1.00998	1.00577	1.00508	0.99334	0.98971
840.436	0.97909	0.99209	0.97447	0.98796	0.99931	0.95494
840.029	0.99476	1.005	0.99594	0.99314	0.97959	0.97097
839.485	0.99205	0.99841	0.97591	0.99105	0.97907	0.96305
838.942	1.00025	1.00697	0.9995	0.99289	0.99758	0.96781
838.534	0.98889	0.99585	0.98168	1.00308	1.00466	0.97763
837.99	1.0126	1.01591	0.98856	0.99567	1.00542	0.97303
837.446	0.99858	1.01033	0.98776	0.99776	0.9886	0.9824
837.038	1.00536	1.00972	0.99229	1.00156	1.00149	0.98297
836.494	0.9985	1.00711	0.99489	0.98486	0.991	0.99065
835.949	1.01337	1.00168	0.98798	0.98578	0.98361	0.96965
835.541	1.00019	1.01094	0.98233	0.98955	0.98696	0.97595
834.996	0.99659	1.0034	0.98313	0.99548	0.98664	0.97336
834.451	0.99494	1.00377	0.9925	0.98782	0.98856	0.98298
834.043	1.0043	1.00148	0.99587	1.0003	0.99367	0.97706
833.498	0.99125	0.99254	0.993	0.98946	0.99769	0.97658
832.953	0.9816	0.98776	0.97198	0.96899	0.98222	0.97131
832.544	0.99935	1.01334	0.98451	1.00243	0.98877	0.97807
831.999	0.99777	1.00087	0.98998	0.99446	0.98708	0.98335
831.453	1.00248	1.00315	0.98452	0.99432	0.99039	0.9747
831.044	0.9973	1.00915	0.98065	0.9909	1.00829	0.97573
830.498	0.99536	1.00295	0.98201	0.98726	0.99262	0.96316
829.953	1.00193	1.0048	0.97793	0.98503	0.9968	0.96403
829.543	1.002	1.00288	0.98203	0.99356	0.99396	0.98307
828.997	0.99314	1.00849	0.98058	0.98614	0.99196	0.97904
828.451	0.99925	1.01314	0.99166	0.97835	0.98895	0.97429
828.041	0.99166	1.01087	0.98208	0.99453	0.98596	0.97029
827.495	0.99685	1.00737	0.97859	0.99121	0.97812	0.97485
826.949	0.99709	1.00811	0.98801	0.99163	0.9827	0.98151
826.539	0.99843	1.00385	0.98376	0.99709	0.98901	0.96711
825.992	0.99761	1.00735	0.98316	0.9886	1.00008	0.9777
825.445	1.00069	1.00238	0.9912	0.99491	1.00501	0.97667
825.035	0.99791	1.00766	0.98802	0.99026	0.9984	0.97746
824.488	1.00507	1.00367	0.98423	0.98592	0.98572	0.97323
823.941	0.99818	1.0058	0.98606	0.99474	0.99236	0.97484
823.53	0.99979	0.99986	0.9826	0.99129	0.98825	0.9773
822.983	1.00212	1.00798	0.99522	0.98664	0.99686	0.97431
822.435	1.00242	1.01955	0.98922	0.98998	0.99731	0.97785
822.024	1.00128	1.00046	0.98189	0.98974	1.00013	0.97992
821.477	1.00844	0.99961	0.98296	0.99239	0.98989	0.97715
821.066	0.99822	1.0037	0.98823	0.99168	1.00768	0.9744
820.518	1.00181	0.99775	0.97877	0.97472	0.98295	0.97947
819.97	1.00318	0.99963	0.97542	0.98125	0.98469	0.98035
819.559	1.00712	1.00432	0.97618	0.99353	1.00156	0.97805
819.01	0.98553	1.01068	0.98431	0.99152	0.98784	0.97617
818.462	1.01522	0.99779	0.98232	0.98211	0.96818	0.95968
818.05	0.98589	1.03037	0.98295	0.9813	0.97733	0.97723
817.502	1.00656	0.99395	0.99418	0.9759	1.00309	0.97946
816.953	1.00311	1.00792	0.99317	0.98947	1.02625	0.97703
816.541	0.99587	1.01843	0.98083	0.97737	0.97921	0.97038
815.992	1.00165	1.02078	0.9865	0.9834	0.98889	0.96577
815.443	0.99475	1.00947	0.96851	0.97835	0.98639	0.95224
815.031	1.00335	0.99732	0.98014	1.0039	0.98924	0.97337
814.482	0.99858	1.01636	0.97637	0.97815	0.99758	0.96679
813.932	0.993	1.01083	0.98541	1.01222	1.00611	0.97445
813.52	1.0109	0.99477	0.97325	0.99308	0.98239	0.96415
812.97	0.98764	1.01878	0.97717	1.00447	1.00379	0.98825
812.558	1.00188	0.99586	0.99009	1.0011	1.00312	0.98202
812.008	0.98972	1.0152	0.9855	0.9812	1.00418	0.97767
811.458	0.98908	1.01006	0.99182	0.97885	0.98322	0.97204
811.045	1.00407	1.01266	0.98196	0.99473	1.00549	0.99539
810.495	0.9889	1.01202	0.99101	0.99312	0.99216	0.97544
809.945	1.01335	1.0012	0.98902	1.00131	0.99436	0.99222
809.532	1.00871	1.01046	0.99436	0.98512	0.98392	0.97586
808.981	1.01079	1.01207	0.98638	0.99817	0.98369	0.97868
808.568	1.01109	0.98884	1.00136	0.98678	0.99221	0.96229
808.017	1.00358	1.01434	0.98042	0.97992	1.00091	0.98171
807.466	1.01182	1.02343	0.98986	0.97897	0.99219	0.99435
807.053	0.99858	1.01408	1.00008	0.98562	0.98915	0.98007
806.502	1.0009	1.00522	0.9834	0.98829	0.98839	0.99153
805.951	1.00101	1.00806	0.97445	0.99475	0.9828	0.97592
805.537	0.9972	0.98844	0.97865	0.99093	0.99503	0.96501
804.986	0.9989	1.00781	0.9812	0.98042	0.99865	0.97639
804.434	1.00233	1.01237	0.97904	0.99032	0.99252	0.97113
804.02	1.00823	1.01412	0.97613	0.98455	0.96424	0.97366
803.468	0.99904	1.00083	0.99269	0.99274	1.00112	0.98734
803.054	1.00782	0.98928	1.00412	0.99554	1.00907	1.00131
802.502	0.98739	1.00047	0.982	0.9955	0.97855	0.96648
801.95	0.97624	1.00434	0.97856	0.98373	0.98883	0.98833
801.536	0.98721	1.003	0.98633	0.97789	1.00077	0.97716
800.983	0.9901	0.99972	0.99917	0.98576	0.98631	0.98976
800.569	1.0142	1.01234	0.9969	0.99958	1.006	0.99976
800.016	1.01025	1.02071	0.99032	0.99707	0.99892	0.98471
799.464	1.0091	1.01518	0.98905	0.98739	1.01211	0.97009
799.049	0.99497	0.99272	1.00004	0.98544	0.98723	0.9752
798.496	1.01309	1.0121	0.99117	1.00444	1.02429	0.99256
797.943	1.00953	1.0053	0.99784	0.99089	1.01333	0.96393
797.528	0.99395	1.01267	0.98166	0.99302	0.98643	0.98381
796.975	0.99734	1.00372	0.98737	0.99218	1.0057	0.9879
796.56	0.99499	1.00324	0.98301	0.98559	1.00914	0.97257
796.006	1.00627	1.00657	0.98454	0.98681	0.99757	0.97867
795.453	0.99556	1.00754	0.99509	0.99811	1.01757	0.98483
795.037	0.99017	1.00535	1.001	0.98802	1.00418	1.00305
794.483	0.99456	1.00037	1.01017	0.99766	1.00622	0.97868
794.068	0.99382	1.01096	0.98588	0.97879	1.00728	0.9769
793.514	1.01224	1.01418	0.99965	1.00522	0.99682	0.98425
792.96	0.98874	1.00026	0.97079	0.99022	0.9777	0.99455
792.544	1.00589	0.9915	0.98454	0.99394	0.99371	0.99073
791.989	1.01911	1.01558	0.99057	1.00195	1.00425	0.97483
791.435	1.01766	1.02997	0.98889	1.00131	1.00049	0.98953
791.019	1.00263	1.01046	1.00427	1.00742	1.00871	0.98084
790.464	0.99672	1.01383	0.98751	0.9923	1.0018	0.98799
790.048	1.01929	1.01646	1.0166	0.99494	1.00363	0.99003
789.493	0.99848	1.02386	0.99533	1.00065	1.00115	0.98235
788.938	0.99624	1.00251	0.98652	1.00236	0.99549	0.98176
788.522	1.00927	0.99765	1.00356	0.98566	0.99265	0.99153
787.966	0.98474	1.00564	0.98287	1.00113	0.97604	0.96909
787.55	0.99824	1.00422	1.00112	0.98549	1.00533	0.99262
786.994	1.01002	1.0159	1.00506	1.00073	1.01991	1.00356
786.439	0.98962	0.99623	0.98998	0.99117	0.99364	0.98261
786.022	0.98947	0.98427	0.99385	0.99409	1.01595	0.97167
785.466	1.00847	1.00409	0.9875	0.99492	1.0127	0.98019
785.049	1.01004	0.99646	1.00083	1.00597	1.00318	0.97206
784.493	0.99769	1.01438	1.00129	1.00282	1.00666	1.00062
783.937	1.01677	1.00448	1.00464	1.00334	1.00502	0.97775
783.52	1.00932	1.03105	0.98405	1.0115	0.98714	0.97977
782.963	1.00499	1.00977	0.98002	0.98753	0.99139	0.99046
782.546	0.99733	0.99984	0.99449	1.0022	0.97651	0.98054
781.989	1.00624	1.01476	0.99025	0.99582	1.00102	0.98539
781.433	1.0069	1.01935	0.99983	0.99619	1.006	1.00508
781.015	0.99368	0.99738	0.99639	0.9969	0.99885	1.00674
780.458	0.99331	1.00365	0.98471	1.00348	0.98316	0.97548
780.04	1.01824	1.01186	1.00165	0.99324	1.00166	0.99392
779.483	1.00685	0.99937	0.99559	0.99813	0.99787	0.97213
779.065	0.99659	0.99423	0.98411	0.99222	1.01227	1.00072
778.508	0.99197	1.00136	0.96412	0.9938	1.00938	0.98584
777.951	1.00854	1.00629	0.99427	1.00475	1.01108	0.97934
777.532	1.00547	0.99938	0.99533	1.00715	1.01342	0.98702
776.975	1.02681	1.01765	0.98816	1.00426	0.99612	0.99096
776.556	0.98792	1.0006	0.98658	0.97626	0.98316	0.98479
775.998	0.9896	1.00522	0.9893	0.99612	1.00081	0.9896
775.44	1.00567	1.01727	1.00837	1.00137	0.99475	0.98313
775.022	0.98404	0.99991	0.98084	0.98043	0.99276	0.98233
774.464	1.00765	0.99669	0.99501	1.00871	1.00958	0.97395
774.045	1.01165	1.00248	0.99272	0.99205	1.02106	0.99177
773.486	1.00372	1.0087	0.99403	1.0133	0.98934	0.98432
773.068	1.00765	1.00808	0.99871	1.00645	1.00526	0.99364
772.509	1.01578	1.01554	0.99309	1.00938	1.01013	0.99717
771.95	1.00826	1.00913	0.99696	0.99755	0.97843	0.96501
771.531	1.01056	1.0009	0.97429	0.99598	0.98865	1.00637
770.972	1.01352	1.02045	1.0151	1.01528	1.01523	0.99049
770.553	1.00891	0.99283	0.99781	0.98639	0.981	0.97521
769.994	1.00298	1.0099	0.98355	1.01581	1.00942	0.99002
769.434	1.01121	1.00615	0.98715	1.01888	1.00656	0.98278
769.015	0.99588	1.00115	0.98608	0.99976	1.00808	0.9801
768.455	0.9995	1.00555	0.99674	0.98904	1.00829	0.98381
768.036	1.00797	1.00806	0.9991	1.00305	1.001	0.99917
767.476	1.01329	1.0006	0.98942	1.00018	1.01311	0.98718
767.056	1.01304	1.00981	1.00219	1.00114	0.99824	0.98983
766.496	1.00557	0.99999	1.00618	1.00021	1.00042	0.99515
765.936	1.0132	1.01263	0.99655	1.01105	1.019	1.00501
765.516	1.00428	1.00346	0.99344	0.99187	0.99651	0.99376
764.956	1.00203	0.99954	0.98736	0.99418	1.00338	0.99432
764.536	1.0002	1.00819	0.99425	0.99044	0.99293	0.99027
763.975	1.01346	1.00413	1.00021	1.00091	1.01019	0.98474
763.555	1.0073	1.01025	0.99244	1.00093	1.00676	0.98495
762.994	1.00203	1.00252	0.99574	1.00444	1.00742	0.99338
762.433	1.00359	1.01754	0.99887	1.00573	0.99742	0.98947
762.013	1.00147	1.00116	0.99287	1.00082	1.0064	0.98886
761.452	1.01272	1.0072	0.98858	1.00273	1.00745	0.98605
761.031	1.0143	1.00381	0.99575	0.99565	1.01117	0.98243
760.47	1.00789	1.00469	0.99977	0.99626	0.99991	0.99876
760.049	1.00705	1.00887	0.98992	0.99866	1.00726	0.98892
759.487	1.00779	1.00048	0.99065	1.01053	0.98789	0.99012
759.066	1.00394	1.00754	0.98941	1.01068	1.00169	0.97873
758.505	1.01412	1.01366	0.99896	1.01514	1.01928	1.00155
757.943	1.00939	1.00523	0.99984	1.00872	1.00078	0.99705
757.522	1.01113	1.00999	0.99652	1.0048	1.0102	0.9917
756.96	1.01576	1.00209	0.98641	1.00168	1.00495	0.99949
756.538	1.0011	1.00814	1.00011	0.99544	1.01665	0.99692
755.976	1.01392	1.01317	0.99802	1.00137	1.01967	0.98489
755.555	1.01107	1.00133	0.99868	1.00984	0.99251	0.99161
754.992	1.0095	1.00604	0.99884	1.00925	1.00872	0.99688
754.43	0.99692	1.01227	0.99742	1.00451	1.00266	0.98876
754.008	1.00939	0.9979	0.99292	1.00132	1.00863	0.99409
753.445	1.00357	1.00889	0.99408	1.00433	1.00687	0.98812
753.023	1.0052	1.00809	0.99815	0.99665	0.99458	0.98779
752.461	1.01237	1.00719	0.99524	0.99903	1.0099	0.98762
752.038	1.00731	0.9993	0.98752	1.00508	1.01555	0.99573
751.475	1.00967	1.00188	0.9892	0.99949	0.99903	0.99125
751.053	1.00836	1.01281	0.9995	0.99224	1.00993	0.99604
750.49	0.99763	1.00799	1.00155	0.99741	1.00262	0.99867
750.067	1	1	1	1	1	1
749.504	1.00472	1.01665	0.99694	0.99787	1.00045	0.97942
748.94	1.01516	1.00959	0.99062	1.00588	1.00678	1.00551
748.517	1.00485	1.01379	0.99921	1.00134	1.00845	0.99996
747.954	1.00372	1.01522	0.99987	1.00746	1.01048	0.9987
747.531	1.01426	1.01014	1.0014	1.0019	1.00483	0.99095
746.967	1.00873	1.0114	0.99865	0.99575	1.00478	0.99546
746.544	1.00548	0.99396	0.98653	1.00055	1.006	0.98966
745.98	1.01003	0.99918	0.99471	1.00133	1.01069	0.99287
745.557	1.01176	1.00873	0.99444	0.9955	1.00901	0.99015
744.992	1.0125	1.00701	0.99585	1.00162	1.0081	0.99935
744.569	1.00729	1.00665	0.99332	0.99937	1.00724	0.98417
744.004	1.02199	1.00655	0.99817	1.01046	1.00459	1.01183
743.44	1.01461	1.01209	0.99432	1.00784	1.01269	0.99812
743.016	1.01333	1.006	0.98967	1.00655	1.01696	1.0002
742.451	1.01141	1.00556	0.9984	1.00349	1.00439	0.99084
742.027	1.0051	1.01343	0.98854	1.00321	1.01342	0.98871
741.462	1.00644	1.00129	0.9974	1.00549	1.00238	0.98804
741.038	1.00895	1.00655	0.99364	1.00056	1.00827	0.99802
740.473	1.00468	1.00346	1.00346	0.99629	0.99674	0.99723
740.049	1.01093	1.00453	0.99707	1.00313	1.00849	0.9994
739.484	1.0062	1.00156	0.99611	0.99698	1.00272	0.99428
739.059	1.00759	1.00767	1.00082	0.99901	1.01191	1.0019
738.494	1.00485	1.00794	0.99821	1.00263	1.01062	0.99054
738.069	1.01017	1.00741	0.99905	1.00619	1.00837	1.00025
737.504	1.01025	1.01024	1.00439	0.99983	1.01234	0.9984
736.938	1.00109	1.01219	1.00259	1.00109	1.01333	0.99679
736.513	1.00915	1.00794	1.0014	1.0023	1.00478	0.99609
735.947	1.00754	1.00697	1.00882	1.00874	1.00796	0.99518
735.522	1.00658	1.00429	1.00301	1.00154	1.01093	0.99746
734.956	1.00982	1.00282	0.99727	0.99754	1.01708	1.00056
734.531	1.00961	1.006	0.99916	1.00084	1.01652	0.99713
733.964	1.01067	1.00912	1.00065	1.00667	1.01575	1.00061
733.539	1.01129	1.00508	0.99831	1.00228	1.01162	0.99614
732.973	1.01223	1.01113	0.99898	1.00594	1.0146	1.00065
732.547	1.00775	1.0071	0.99613	1.00415	1.0201	1.00794
731.98	1.0155	1.00643	1.00101	1.00675	1.0172	1.00001
731.555	1.0162	1.0112	1.00783	1.00508	1.01701	1.00223
730.988	1.01328	1.00376	1.0008	1.00561	1.00897	0.99522
730.562	1.01124	1.00842	1.00198	1.00315	1.01482	0.99173
729.995	1.01342	1.01329	1.00381	1.00566	1.01085	1.00153
729.57	1.00758	1.01134	1.00733	1.00907	1.006	0.99963
729.002	1.00762	1.01333	1.00029	1.00591	1.00375	0.99327
728.434	1.00909	1.01357	1.00602	1.0135	1.00872	1.01018
728.008	1.01527	1.01164	1.00609	1.01295	1.01514	0.9982
727.441	1.00789	1.0114	1.00676	1.00442	1.00581	1.00266
727.015	1.01319	1.00664	1.00543	1.00424	1.01367	1.00052
726.447	1.00745	1.01539	0.99874	1.00195	1.01449	0.99882
726.02	1.01341	1.00954	1.00021	1.00033	1.00758	1.00231
725.452	1.01245	1.01171	1.00305	1.00914	1.00717	1.00385
725.026	1.00725	1.01428	1.00602	1.00555	1.01166	0.99968
724.457	1.00838	1.01287	1.00041	1.00397	1.00757	1.00609
724.031	1.01389	1.0073	1.00452	1.00171	1.01768	1.00297
723.462	1.01079	1.01679	1.00517	1.01246	1.01662	1.00464
723.036	1.01481	1.01749	1.00492	1.00703	1.01381	1.00736
722.467	1.01105	1.00346	1.00246	1.00452	1.01078	0.9969
722.04	1.0096	1.0069	1.00114	1.00646	1.00791	1.00588
721.471	1.0173	1.01295	1.00117	1.014	1.02115	1.00269
721.044	1.01321	1.0083	1.0104	1.00455	1.01132	1.00302
720.475	1.01015	1.00668	1.00416	1.00461	1.01311	0.99929
720.048	1.01165	1.00474	0.99642	1.00342	1.01412	0.99772
719.479	1.01152	1.01381	1.01172	1.00808	1.00579	1.00065
719.051	1.01446	1.02065	1.00462	1.01428	1.01216	1.00063
718.482	1.01639	1.01436	1.00283	1.0046	1.01895	1.00435
718.054	1.01391	1.00817	0.99711	1.00453	1.02192	0.9986
717.485	1.00843	1.00988	1.00414	1.01285	1.01392	0.99835
717.057	1.01406	1.00686	1.00376	1.0134	1.01512	0.99733
716.487	1.01851	1.00906	1.01036	1.0113	1.01906	1.0069
716.06	1.00879	1.00551	0.99991	1.00647	1.01403	1.00298
715.489	1.02338	1.01692	1.00296	1.01527	1.02512	1.00604
715.062	1.01271	1.01102	1.00502	1.00293	1.01273	1.00284
714.491	1.01817	1.00712	1.00936	1.0133	1.01911	1.00956
714.063	1.01132	1.01138	1.007	1.00763	1.01515	1.00098
713.493	1.01013	1.00459	1.00428	1.01506	1.01265	1.00598
713.065	1.01762	1.01719	1.00555	1.01594	1.01416	1.00301
712.494	1.01112	1.01501	1.00526	1.01611	1.02046	1.00564
712.066	1.01367	1.00621	1.00295	1.00893	1.01021	1.00689
711.495	1.01847	1.02007	1.01071	1.00877	1.01461	1.00396
711.067	1.01125	1.01539	1.0051	1.01109	1.01312	1.00653
710.495	1.01701	1.02849	1.01104	1.0128	1.0228	1.02347
710.067	1.01191	1.01256	0.99864	1.01142	1.01207	1.00762
709.496	1.01261	1.01741	1.00238	1.01508	1.01116	0.99871
709.067	1.02142	1.01898	1.00327	1.015	1.02947	1.00621
708.495	1.01232	1.02012	1.01462	1.01702	1.02432	1.00882
708.067	1.01226	1.0168	1.00473	1.01729	1.02608	1.01212
707.495	1.02283	1.01856	1.01049	1.01384	1.02143	1.0027
707.066	1.01486	1.01716	1.01119	1.01699	1.03068	1.00726
706.494	1.01347	1.02614	1.00158	1.00824	1.0172	1.00613
706.065	1.01879	1.01388	1.00479	1.0101	1.025	1.01617
705.493	1.01218	1.01791	1.00258	0.99823	1.0088	1.0006
705.064	1.01034	1.01501	1.01334	1.01626	1.01546	1.00963
704.492	1.013	1.01279	1.00292	1.00768	1.01463	1.0058
704.062	1.01371	1.01871	1.01216	1.00634	1.01323	1.00521
703.49	1.02131	1.01301	1.00938	1.00807	1.02474	1.01429
703.06	1.01996	1.01849	1.00679	1.02342	1.021	1.01058
702.488	1.01194	1.01523	1.01314	1.0111	1.01569	1.0051
702.058	1.01715	1.01754	1.01237	1.01912	1.01072	1.01167
701.485	1.0142	1.01035	1.00519	1.00576	1.02237	1.00644
701.055	1.01819	1.02075	1.00114	1.0093	1.0203	1.0123
700.482	1.01584	1.02117	1.00617	1.00997	1.01538	1.00638
700.052	1.01408	1.01478	1.00251	1.0065	1.02055	1.01118
699.479	1.01555	1.01285	1.01131	1.00379	1.01737	1.01161
699.049	1.01905	1.02033	1.00843	1.00999	1.01577	1.01205
698.476	1.01539	1.02027	1.01135	1.01685	1.01847	1.01466
698.046	1.01659	1.00896	1.00129	1.01104	1.01279	1.00628
697.472	1.02906	1.02112	1.00187	1.01684	1.02231	1.01491
697.042	1.02015	1.03049	1.00863	1.02031	1.02076	1.01309
696.468	1.01536	1.01523	1.01325	1.01151	1.01473	1.00463
696.037	1.01934	1.02179	1.00762	1.01146	1.01772	1.00414
695.463	1.02763	1.02395	1.01083	1.01944	1.02915	1.01723
695.033	1.01649	1.0154	1.01712	1.01839	1.02252	1.01531
694.458	1.01204	1.01377	1.00484	1.00861	1.01856	1.00314
694.028	1.0118	1.01468	1.0097	1.00851	1.01852	1.00373
693.453	1.01644	1.0184	1.02104	1.01796	1.03005	1.02012
693.023	1.01994	1.01458	1.0115	1.01718	1.02034	1.01108
692.448	1.01704	1.02633	1.01982	1.02241	1.01843	1.0166
692.017	1.01778	1.02101	1.01697	1.01099	1.02044	1.0193
691.442	1.02187	1.01511	1.01761	1.01552	1.02576	1.01116
691.011	1.01641	1.0122	1.018	1.01228	1.02724	1.01459
690.436	1.02092	1.01844	1.00891	1.01617	1.02776	1.01833
690.005	1.02026	1.02793	1.01846	1.01725	1.023	1.02304
689.43	1.01359	1.01745	1.01	1.0106	1.00837	1.00432
688.998	1.01818	1.01604	1.01161	1.01838	1.01913	1.00192
688.567	1.01401	1.01542	1.00124	1.02231	1.03183	1.00673
687.991	1.02033	1.02556	1.01705	1.01424	1.03192	1.01532
687.56	1.02335	1.01682	1.01928	1.03168	1.0195	1.01736
686.984	1.01947	1.03163	1.0129	1.01441	1.02977	1.02653
686.552	1.01685	1.019	1.01146	1.02093	1.03212	1.01372
685.977	1.02239	1.01592	1.01902	1.01181	1.01849	1.01467
685.545	1.01886	1.02276	1.01091	1.01559	1.01544	1.00836
684.969	1.01342	1.02948	1.00994	1.01761	1.0209	1.02218
684.537	1.01857	1.02516	1.01177	1.03124	1.02228	1.02114
683.961	1.01628	1.0247	1.01537	1.01707	1.02627	1.01439
683.528	1.02046	1.01429	1.01686	1.0132	1.02599	1.0209
682.952	1.01516	1.02518	1.01501	1.02	1.01981	1.01722
682.52	1.01423	1.01654	1.00845	1.01609	1.03208	1.01089
681.943	1.0169	1.02178	1.0141	1.02048	1.01981	1.01542
681.511	1.02901	1.01309	1.01101	1.01864	1.02536	1.0148
680.934	1.01927	1.02358	1.01159	1.01345	1.02155	1.01682
680.502	1.02186	1.02657	1.01269	1.01688	1.02306	1.02651
680.069	1.01214	1.02462	1.00944	1.01446	1.02096	1.01509
679.492	1.01051	1.02344	1.00868	1.02487	1.02013	1.01157
679.059	1.01098	1.01847	1.01392	1.00643	1.02042	1.01908
678.482	1.01983	1.02577	1.01326	1.01442	1.02542	1.01139
678.049	1.01922	1.02037	1.01304	1.01807	1.0257	1.01939
677.472	1.01519	1.01615	1.00897	1.01784	1.01685	1.0147
677.039	1.01444	1.02284	1.00918	1.01546	1.02105	1.01218
676.461	1.01724	1.01797	1.01089	1.02287	1.0226	1.0121
676.028	1.02198	1.01692	1.01806	1.02187	1.03021	1.01891
675.45	1.01588	1.02423	1.01	1.01655	1.0261	1.01663
675.017	1.02158	1.02353	1.01505	1.0182	1.03139	1.03005
674.439	1.01609	1.01789	1.0189	1.01498	1.02056	1.01673
674.006	1.01693	1.01623	1.01819	1.01097	1.01769	1.01597
673.572	1.01723	1.01868	1.0122	1.02066	1.03759	1.01886
672.994	1.02264	1.02224	1.01715	1.01376	1.02425	1.01818
672.56	1.01326	1.00668	1.00778	1.01833	1.02217	1.00737
671.982	1.01231	1.02663	1.01245	1.02632	1.0221	1.02188
671.548	1.01036	1.02429	1.01667	1.01773	1.01973	1.016
670.97	1.01817	1.02741	1.01301	1.03376	1.0306	1.01932
670.536	1.0143	1.00859	1.00945	1.01227	1.02455	1.01099
669.957	1.02433	1.02172	1.02088	1.01918	1.0288	1.02376
669.523	1.01527	1.01127	1.02125	1.02054	1.02842	1.01926
668.944	1.01825	1.01995	1.01298	1.02114	1.03104	1.01563
668.51	1.01169	1.02141	1.02247	1.02106	1.03013	1.0246
667.931	1.01116	1.01496	1.0148	1.0248	1.03434	1.01458
667.497	1.01915	1.01459	1.01363	1.0219	1.0278	1.01269
667.062	1.02039	1.0294	1.0169	1.02704	1.03779	1.02414
666.483	1.01331	1.02025	1.01291	1.02094	1.03168	1.02255
666.048	1.01328	1.01444	1.01271	1.01501	1.03802	1.01595
665.469	1.02818	1.03372	1.0253	1.02916	1.0408	1.02197
665.034	1.01608	1.027	1.01917	1.02131	1.0276	1.01906
664.455	1.01486	1.02558	1.02095	1.03255	1.02929	1.0205
664.02	1.01592	1.02524	1.01638	1.02805	1.03515	1.00999
663.44	1.01733	1.02643	1.02164	1.02737	1.03992	1.02945
663.005	1.0139	1.01699	1.0127	1.02384	1.03191	1.02341
662.57	1.02686	1.02215	1.02113	1.02028	1.02593	1.02805
661.99	1.02299	1.02701	1.02211	1.02924	1.03935	1.02762
661.555	1.01762	1.02418	1.02097	1.02373	1.03123	1.02747
660.975	1.02382	1.02438	1.02215	1.02651	1.03865	1.02748
660.539	1.02479	1.02563	1.02387	1.0212	1.03184	1.02065
659.959	1.02122	1.02047	1.02327	1.0283	1.03328	1.02399
659.524	1.02172	1.02452	1.01906	1.02924	1.03894	1.02608
658.943	1.0172	1.02948	1.01837	1.02062	1.03052	1.02688
658.507	1.0191	1.01902	1.02299	1.0256	1.02933	1.02922
658.072	1.01664	1.02492	1.01541	1.02835	1.03186	1.02445
657.491	1.0119	1.02442	1.02361	1.02786	1.03068	1.03116
657.055	1.01962	1.02488	1.02415	1.0241	1.02305	1.02322
656.474	1.02133	1.02437	1.01673	1.0206	1.0375	1.02704
656.038	1.02538	1.02867	1.0208	1.02866	1.034	1.02102
655.457	1.01477	1.02226	1.0145	1.02221	1.02979	1.0406
655.021	1.02509	1.03167	1.02625	1.02538	1.0422	1.02473
654.44	1.02336	1.02642	1.02536	1.03012	1.0382	1.02935
654.004	1.01868	1.02398	1.0208	1.02106	1.03024	1.02374
653.567	1.02028	1.02897	1.02765	1.02357	1.0341	1.03263
652.986	1.02476	1.03092	1.02163	1.02367	1.03832	1.03312
652.549	1.02505	1.02276	1.01426	1.0232	1.031	1.02751
651.968	1.01769	1.02549	1.01455	1.02537	1.0257	1.02803
651.531	1.02664	1.02304	1.02082	1.0237	1.02956	1.03328
650.949	1.01788	1.02613	1.0205	1.02228	1.0251	1.03119
650.513	1.01731	1.02286	1.02519	1.02445	1.03065	1.03306
649.93	1.01638	1.02721	1.01927	1.02881	1.03101	1.03024
649.494	1.02576	1.03575	1.02338	1.01215	1.04268	1.03545
649.057	1.01559	1.02991	1.02832	1.02834	1.04486	1.03167
648.474	1.01671	1.03127	1.025	1.02874	1.04055	1.03082
648.038	1.02561	1.03271	1.02266	1.02618	1.04059	1.03821
647.455	1.02847	1.03328	1.02752	1.02775	1.0312	1.03199
647.018	1.01867	1.02531	1.03316	1.02735	1.04119	1.03141
646.435	1.02082	1.02666	1.02119	1.01522	1.03331	1.02072
645.998	1.01503	1.0276	1.02498	1.01893	1.02534	1.03091
645.561	1.0149	1.02046	1.01526	1.01661	1.03591	1.0301
644.978	1.02054	1.0255	1.02573	1.02871	1.03161	1.03478
644.54	1.02055	1.0257	1.02253	1.02299	1.03201	1.03336
643.957	1.02689	1.02904	1.03008	1.03138	1.04758	1.0316
643.52	1.02322	1.02469	1.02676	1.01902	1.03352	1.03158
642.936	1.01968	1.02819	1.02792	1.03432	1.03558	1.03289
642.499	1.02816	1.02829	1.02051	1.02656	1.04262	1.0386
642.061	1.02209	1.0281	1.02702	1.02846	1.04051	1.02905
641.478	1.02583	1.04046	1.03233	1.02728	1.04688	1.03867
641.04	1.02697	1.02518	1.02699	1.03039	1.04194	1.03886
640.456	1.02257	1.02702	1.0212	1.02179	1.04552	1.03418
640.018	1.02587	1.02614	1.02139	1.02458	1.03406	1.03184
639.434	1.02344	1.03777	1.02442	1.02783	1.03477	1.04071
638.996	1.0195	1.02801	1.02368	1.02319	1.04003	1.02862
638.558	1.01739	1.0257	1.02577	1.02432	1.04432	1.0232
637.974	1.02607	1.03228	1.02297	1.03398	1.0364	1.03229
637.536	1.02728	1.02367	1.02646	1.03016	1.03595	1.04045
636.951	1.02941	1.03291	1.02655	1.03111	1.04839	1.03496
636.513	1.0189	1.02623	1.0259	1.02134	1.03105	1.02962
635.928	1.02185	1.03026	1.02767	1.0272	1.04157	1.03073
635.49	1.02724	1.02986	1.03334	1.0321	1.04359	1.03598
635.051	1.02422	1.0306	1.02384	1.03076	1.03988	1.04235
634.466	1.02473	1.03096	1.02621	1.02802	1.04164	1.03483
634.028	1.02132	1.03253	1.02093	1.02788	1.03924	1.03461
633.443	1.01912	1.0295	1.01869	1.02659	1.04022	1.0321
633.004	1.02273	1.03454	1.02405	1.02616	1.0355	1.0383
632.565	1.02691	1.0349	1.02401	1.03477	1.04302	1.03956
631.98	1.02112	1.0373	1.02628	1.03074	1.03929	1.03231
631.541	1.03038	1.03359	1.03115	1.02556	1.04729	1.04148
630.956	1.01591	1.02021	1.02171	1.03504	1.03857	1.03609
630.516	1.02555	1.0301	1.02565	1.02788	1.03615	1.03567
629.931	1.02508	1.02918	1.02685	1.02999	1.04509	1.03274
629.492	1.02027	1.03258	1.02552	1.02509	1.04877	1.0302
629.052	1.02879	1.03812	1.02668	1.02777	1.04567	1.03494
628.467	1.02681	1.03496	1.02699	1.04137	1.043	1.03931
628.027	1.02846	1.03575	1.03074	1.02893	1.05118	1.03428
627.441	1.02053	1.03372	1.02426	1.03231	1.042	1.03425
627.002	1.02788	1.03414	1.03256	1.03342	1.0446	1.0391
626.562	1.02605	1.03252	1.03067	1.03259	1.04486	1.04356
625.976	1.0288	1.0332	1.03385	1.03546	1.0485	1.04323
625.536	1.02636	1.03069	1.03487	1.03361	1.04518	1.03462
624.95	1.02221	1.03667	1.02377	1.03558	1.03784	1.03682
624.51	1.0264	1.03102	1.02885	1.03184	1.04716	1.03867
624.07	1.02743	1.03363	1.03237	1.02953	1.05255	1.0394
623.483	1.02892	1.03356	1.03587	1.0302	1.0465	1.03423
623.043	1.02666	1.02696	1.03358	1.03664	1.05005	1.04833
622.457	1.02811	1.03538	1.03279	1.03456	1.05011	1.05274
622.016	1.02643	1.03468	1.02375	1.03387	1.04143	1.0435
621.429	1.02147	1.03225	1.03757	1.02306	1.04399	1.03742
620.989	1.02769	1.02987	1.02869	1.03185	1.04613	1.03895
620.549	1.02739	1.02845	1.03063	1.03096	1.04399	1.0397
619.962	1.0286	1.03829	1.0306	1.03414	1.04961	1.04037
619.521	1.02883	1.02971	1.03121	1.04014	1.04266	1.04345
618.934	1.02239	1.03283	1.03323	1.03428	1.04552	1.04214
618.493	1.02804	1.03594	1.03115	1.02768	1.04993	1.0491
618.053	1.02585	1.03526	1.03228	1.03149	1.04868	1.04525
617.465	1.02635	1.03354	1.03219	1.03696	1.04328	1.04115
617.024	1.02795	1.03774	1.03561	1.03307	1.04751	1.04132
616.436	1.02498	1.02936	1.03367	1.02984	1.04284	1.03953
615.996	1.02603	1.03853	1.03313	1.03327	1.0527	1.03943
615.555	1.02784	1.0329	1.0323	1.03591	1.04558	1.04808
614.967	1.02678	1.03414	1.03874	1.0349	1.04416	1.04188
614.526	1.0251	1.03823	1.03313	1.03486	1.04739	1.04555
613.937	1.0315	1.04167	1.03447	1.03379	1.05323	1.04374
613.496	1.02234	1.03277	1.03146	1.03061	1.03799	1.04086
613.055	1.02668	1.03875	1.03984	1.03576	1.05461	1.04765
612.467	1.02876	1.03425	1.03609	1.03863	1.05003	1.04579
612.025	1.02736	1.03653	1.03682	1.03783	1.04991	1.04507
611.437	1.02509	1.03453	1.03242	1.03221	1.04746	1.03729
610.995	1.02955	1.04015	1.04179	1.03358	1.05427	1.05442
610.554	1.02917	1.03971	1.03677	1.03727	1.04794	1.04409
609.965	1.02544	1.03375	1.03573	1.03043	1.04774	1.04924
609.523	1.0315	1.04124	1.04024	1.03617	1.05245	1.05003
608.934	1.0293	1.03675	1.03706	1.03829	1.04862	1.04926
608.492	1.02578	1.03752	1.03566	1.03698	1.04728	1.04421
608.05	1.02996	1.04124	1.03488	1.03615	1.05267	1.05401
607.461	1.03031	1.03897	1.03808	1.03627	1.04897	1.05159
607.019	1.03114	1.03878	1.04031	1.03537	1.0534	1.04904
606.43	1.0328	1.04043	1.03577	1.03816	1.05345	1.04973
605.988	1.03172	1.03934	1.043	1.03922	1.05268	1.04971
605.546	1.03274	1.0443	1.03917	1.04405	1.05684	1.05188
604.956	1.03066	1.04174	1.04034	1.04206	1.05428	1.04971
604.514	1.02748	1.03859	1.03827	1.03794	1.05552	1.05298
604.072	1.03136	1.04	1.04015	1.03603	1.05329	1.05472
603.482	1.03152	1.04215	1.03753	1.04189	1.05042	1.05182
603.039	1.03007	1.03604	1.03586	1.03885	1.04924	1.05399
602.449	1.03521	1.04037	1.03955	1.03908	1.05151	1.05113
602.007	1.03222	1.03524	1.03733	1.03944	1.05809	1.05037
601.564	1.02822	1.04129	1.03863	1.03763	1.05019	1.04957
600.974	1.0321	1.03453	1.04147	1.03417	1.05719	1.04832
600.531	1.03017	1.03603	1.04145	1.04334	1.05453	1.05347
599.941	1.02751	1.04608	1.03919	1.03935	1.05911	1.05213
599.498	1.02988	1.04427	1.04031	1.03866	1.0536	1.05319
599.055	1.03351	1.04092	1.04269	1.03746	1.0488	1.05671
598.464	1.02927	1.03852	1.04065	1.04211	1.05711	1.05354
598.021	1.03136	1.04061	1.04311	1.03496	1.05642	1.05082
597.431	1.03236	1.04148	1.04092	1.04003	1.05282	1.05557
596.987	1.03138	1.04191	1.04097	1.04245	1.05575	1.05565
596.544	1.03305	1.03976	1.04271	1.04046	1.0574	1.05565
595.953	1.0323	1.04458	1.04123	1.04558	1.05653	1.05618
595.51	1.02937	1.04474	1.04049	1.04277	1.05744	1.05775
595.067	1.03126	1.03827	1.04185	1.04079	1.05534	1.05494
594.475	1.02998	1.04159	1.04181	1.04307	1.05817	1.05041
594.032	1.03239	1.04893	1.04078	1.04364	1.06207	1.05732
593.44	1.03539	1.04317	1.04272	1.04274	1.05385	1.05607
592.997	1.03257	1.04806	1.04751	1.04142	1.05654	1.0542
592.553	1.03016	1.04212	1.03824	1.0425	1.05616	1.0528
591.961	1.0314	1.04004	1.045	1.0406	1.05466	1.05731
591.518	1.03179	1.0387	1.04273	1.03682	1.05704	1.05506
591.074	1.03256	1.04394	1.04539	1.04437	1.06295	1.05974
590.482	1.03512	1.04158	1.03995	1.04054	1.05902	1.05379
590.038	1.03232	1.04545	1.04918	1.04225	1.05588	1.06193
589.446	1.03187	1.04392	1.04053	1.04274	1.05786	1.05592
589.002	1.03515	1.04499	1.04253	1.04129	1.05485	1.05352
588.558	1.03605	1.047	1.03841	1.04703	1.061	1.0649
587.966	1.03538	1.04172	1.04659	1.04437	1.05858	1.06063
587.521	1.03221	1.04928	1.04244	1.05008	1.06306	1.06352
586.929	1.03267	1.04063	1.04016	1.04332	1.05751	1.05825
586.485	1.03089	1.03784	1.03726	1.04244	1.05573	1.05045
586.04	1.03396	1.04613	1.04627	1.04743	1.05284	1.06316
585.448	1.03223	1.04077	1.04259	1.04337	1.0579	1.05453
585.003	1.03507	1.0468	1.04428	1.05122	1.05808	1.05886
584.558	1.03464	1.04391	1.0425	1.04397	1.0541	1.06025
583.966	1.02985	1.0486	1.048	1.04804	1.05826	1.06016
583.521	1.03254	1.03918	1.04491	1.04445	1.06095	1.06058
582.928	1.03659	1.04772	1.04556	1.04734	1.06046	1.0592
582.483	1.03503	1.04131	1.0452	1.05118	1.0567	1.05626
582.038	1.03799	1.04484	1.04896	1.04722	1.06172	1.06047
581.445	1.03962	1.05023	1.04559	1.05016	1.06409	1.06196
581	1.03364	1.04801	1.04341	1.04638	1.06284	1.05857
580.555	1.03727	1.0502	1.04536	1.05277	1.0636	1.06616
579.961	1.03235	1.0449	1.04779	1.04856	1.05981	1.05968
579.516	1.03952	1.04741	1.04671	1.04845	1.06201	1.06689
579.071	1.03077	1.04175	1.04548	1.04502	1.0623	1.06
578.477	1.0373	1.04734	1.04365	1.05085	1.0678	1.05993
578.032	1.03596	1.04605	1.04773	1.04978	1.0594	1.06046
577.438	1.03026	1.04764	1.04459	1.04913	1.06461	1.06353
576.993	1.03522	1.04886	1.04664	1.05074	1.06294	1.06261
576.547	1.03429	1.04491	1.04288	1.05035	1.06637	1.06221
575.953	1.03903	1.04852	1.04896	1.05456	1.06577	1.06456
575.508	1.03499	1.05089	1.04476	1.04842	1.06413	1.06626
575.062	1.03583	1.04944	1.05194	1.04956	1.06884	1.06455
574.468	1.04032	1.04864	1.04544	1.05146	1.0644	1.06763
574.022	1.03734	1.04986	1.04981	1.05039	1.06871	1.06502
573.427	1.03467	1.04903	1.04539	1.04677	1.06445	1.06441
572.982	1.03836	1.05479	1.04769	1.05177	1.06722	1.06306
572.536	1.03389	1.05065	1.05242	1.05132	1.06444	1.06434
571.941	1.03807	1.04916	1.04904	1.05115	1.06387	1.06527
571.495	1.03571	1.05234	1.0471	1.05354	1.0671	1.06651
571.049	1.03834	1.05091	1.05075	1.05106	1.06961	1.0619
570.454	1.0351	1.04713	1.04948	1.05143	1.06879	1.07122
570.008	1.03754	1.05348	1.0475	1.05352	1.06884	1.06392
569.562	1.03663	1.05219	1.05094	1.0522	1.07156	1.07092
568.966	1.03996	1.0498	1.0519	1.05187	1.07153	1.06996
568.52	1.03908	1.04986	1.05133	1.05353	1.07142	1.0683
568.074	1.03408	1.05123	1.04627	1.04989	1.06527	1.0698
567.478	1.03304	1.05386	1.05362	1.06027	1.07181	1.06788
567.032	1.03571	1.05382	1.05229	1.0532	1.07314	1.06784
566.436	1.03697	1.05188	1.04874	1.05302	1.06857	1.06923
565.99	1.03566	1.0515	1.04816	1.05413	1.06969	1.07099
565.543	1.03466	1.05063	1.05178	1.05241	1.07094	1.06889
564.947	1.03548	1.05303	1.04902	1.05423	1.07432	1.0675
564.5	1.03607	1.05098	1.05199	1.0549	1.06612	1.07276
564.054	1.03503	1.05334	1.05067	1.0557	1.07024	1.06735
563.458	1.03638	1.04862	1.05287	1.05341	1.06703	1.07115
563.011	1.03742	1.05457	1.05237	1.05408	1.0698	1.0716
562.564	1.03782	1.04816	1.05421	1.05611	1.07285	1.07369
561.968	1.03571	1.05438	1.05361	1.05669	1.07181	1.0706
561.52	1.03916	1.05242	1.05063	1.05733	1.07057	1.07398
561.073	1.03684	1.05425	1.05206	1.05636	1.06735	1.07194
560.477	1.0391	1.05406	1.05395	1.05812	1.0742	1.07269
560.03	1.03689	1.05441	1.04745	1.05393	1.07274	1.07548
559.433	1.0362	1.0542	1.05735	1.05987	1.07464	1.07314
558.986	1.0386	1.05914	1.05104	1.05745	1.07589	1.07893
558.538	1.03703	1.05579	1.05579	1.05805	1.06931	1.07547
557.941	1.0379	1.05455	1.05436	1.06034	1.07084	1.07656
557.494	1.04085	1.05392	1.05512	1.05888	1.07433	1.07645
557.046	1.03863	1.05635	1.05125	1.05877	1.07775	1.07645
556.449	1.03537	1.0523	1.05036	1.05433	1.07141	1.0743
556.002	1.03862	1.05533	1.05617	1.05939	1.07701	1.07493
555.554	1.03958	1.05518	1.05565	1.05375	1.07471	1.07521
554.957	1.03783	1.05602	1.04972	1.05763	1.07507	1.07677
554.509	1.03856	1.05626	1.05562	1.05869	1.07279	1.08081
554.061	1.04006	1.05597	1.05472	1.05675	1.07309	1.07671
553.463	1.03864	1.05722	1.05536	1.05989	1.0756	1.08015
553.015	1.0405	1.0586	1.05231	1.05926	1.07606	1.07854
552.567	1.03564	1.05794	1.05357	1.05873	1.07555	1.07849
551.97	1.03643	1.05752	1.05489	1.06117	1.07855	1.08111
551.521	1.04011	1.05465	1.05497	1.05866	1.07749	1.08343
551.073	1.03933	1.05889	1.05445	1.0602	1.07668	1.082
550.475	1.03729	1.05897	1.05642	1.05805	1.08005	1.07784
550.027	1.03852	1.06003	1.05591	1.06357	1.07914	1.07878
549.429	1.04083	1.06108	1.05517	1.06095	1.07832	1.08311
548.981	1.03916	1.06203	1.05547	1.06032	1.07704	1.08259
548.532	1.04077	1.05818	1.05724	1.06237	1.08132	1.08504
547.934	1.03861	1.06046	1.05496	1.06283	1.07802	1.08408
547.485	1.03959	1.05971	1.0559	1.06278	1.08084	1.08444
547.037	1.04066	1.06075	1.0564	1.06215	1.08164	1.08504
546.438	1.04117	1.06045	1.05607	1.06086	1.08106	1.08285
545.989	1.03998	1.06232	1.05651	1.06092	1.07906	1.08562
545.541	1.04078	1.06046	1.05769	1.06254	1.07991	1.0839
544.942	1.04243	1.06	1.05567	1.06193	1.08164	1.08385
544.493	1.04003	1.06195	1.05876	1.06156	1.08114	1.08525
544.044	1.03863	1.05937	1.05605	1.06197	1.08043	1.08587
543.445	1.0394	1.06111	1.05734	1.0636	1.08313	1.08614
542.996	1.03997	1.06297	1.05805	1.0614	1.08143	1.08693
542.547	1.04024	1.06173	1.05919	1.06358	1.08153	1.088
541.948	1.04074	1.06248	1.05791	1.06372	1.08213	1.08715
541.499	1.04022	1.06164	1.05905	1.0641	1.08336	1.08833
541.049	1.04164	1.0635	1.05799	1.06368	1.0813	1.08701
540.45	1.04059	1.0617	1.05692	1.06534	1.08455	1.08744
540.001	1.04073	1.06336	1.06061	1.0663	1.08199	1.08868
539.551	1.04125	1.06408	1.05849	1.06693	1.08151	1.08976
538.952	1.03961	1.06228	1.0602	1.0663	1.08282	1.09118
538.502	1.03901	1.06114	1.05839	1.06183	1.0812	1.0903
538.053	1.03954	1.06307	1.05923	1.06303	1.0831	1.08994
537.453	1.04043	1.06326	1.05982	1.06525	1.0839	1.08798
537.003	1.03998	1.06337	1.06022	1.06543	1.08542	1.09029
536.554	1.04087	1.06392	1.06028	1.06519	1.08579	1.09007
535.954	1.0408	1.06315	1.06145	1.06652	1.08568	1.09212
535.504	1.04095	1.06334	1.06009	1.06658	1.08554	1.09083
535.054	1.04082	1.06441	1.06217	1.06698	1.08627	1.09184
534.454	1.04211	1.06523	1.06073	1.0662	1.08617	1.09194
534.004	1.04241	1.06551	1.0623	1.06729	1.08654	1.09166
533.554	1.04304	1.06658	1.06323	1.06736	1.086	1.09391
532.953	1.04199	1.0644	1.06097	1.06583	1.08593	1.09201
532.503	1.04121	1.06617	1.06298	1.06668	1.08736	1.09337
532.053	1.04258	1.06662	1.06401	1.06838	1.08907	1.09352
531.453	1.04314	1.06536	1.06271	1.06746	1.08594	1.09368
531.002	1.04243	1.06714	1.06417	1.06644	1.08778	1.09393
530.552	1.04243	1.06648	1.06402	1.06777	1.08918	1.09282
529.951	1.04407	1.06634	1.06413	1.06758	1.08855	1.0952
529.501	1.04368	1.06639	1.06537	1.0673	1.08868	1.09536
529.05	1.04409	1.06628	1.06597	1.06905	1.09075	1.09479
528.449	1.04407	1.06721	1.06617	1.06864	1.08925	1.09492
527.999	1.04347	1.06629	1.06565	1.06786	1.08867	1.09477
527.548	1.04344	1.06865	1.06738	1.0679	1.09086	1.09681
526.947	1.04459	1.0683	1.06937	1.06848	1.09064	1.096
526.496	1.04547	1.06845	1.06555	1.06903	1.08987	1.09669
526.045	1.0438	1.06848	1.06719	1.06936	1.08831	1.09592
525.444	1.04638	1.06878	1.06786	1.06952	1.09067	1.09806
524.993	1.04421	1.06895	1.06813	1.07018	1.09175	1.09885
524.542	1.04506	1.06778	1.06856	1.07155	1.09328	1.09808
523.94	1.0466	1.06942	1.07081	1.07234	1.09329	1.0993
523.489	1.04646	1.06951	1.06831	1.07213	1.09372	1.09949
523.038	1.04375	1.06941	1.06942	1.07149	1.09161	1.0977
522.437	1.04645	1.06956	1.06734	1.0726	1.09143	1.09871
521.985	1.04525	1.06878	1.06977	1.07058	1.09319	1.10065
521.534	1.04595	1.07471	1.07218	1.07319	1.0939	1.10257
520.932	1.04563	1.07131	1.07084	1.07236	1.09505	1.09999
520.481	1.04609	1.07111	1.06931	1.07294	1.09515	1.10041
520.029	1.04692	1.07344	1.07242	1.07306	1.09562	1.10218
519.427	1.04548	1.07153	1.07091	1.07429	1.09747	1.10248
518.976	1.04761	1.07181	1.07031	1.07261	1.09689	1.10257
518.524	1.04675	1.07377	1.07145	1.0751	1.09888	1.10249
518.072	1.04531	1.07154	1.0709	1.07267	1.09437	1.1001
517.47	1.04769	1.07401	1.07254	1.07448	1.09921	1.1037
517.018	1.0475	1.07221	1.07055	1.07473	1.09371	1.10333
516.566	1.04744	1.07447	1.07193	1.07246	1.09641	1.10621
515.964	1.0491	1.07591	1.07174	1.07686	1.09988	1.10489
515.512	1.04846	1.07339	1.07344	1.07716	1.10127	1.10619
515.06	1.04774	1.07315	1.07139	1.07472	1.09671	1.10338
514.457	1.04905	1.07342	1.07127	1.07644	1.09957	1.10843
514.005	1.04928	1.07384	1.07454	1.07589	1.10242	1.10944
513.553	1.04948	1.07421	1.07386	1.0768	1.1026	1.10741
512.95	1.04953	1.07501	1.07337	1.07923	1.09771	1.10392
512.498	1.04902	1.07631	1.07458	1.07751	1.09868	1.11177
512.046	1.05128	1.07651	1.0745	1.07775	1.1012	1.10828
511.443	1.05077	1.07574	1.07383	1.07588	1.10044	1.10741
510.99	1.04877	1.07452	1.07422	1.07961	1.10099	1.1076
510.538	1.04827	1.07919	1.0717	1.07753	1.10513	1.11066
509.935	1.052	1.07669	1.07312	1.0762	1.10453	1.1088
509.482	1.05016	1.07759	1.07457	1.07621	1.09939	1.11096
509.03	1.04961	1.07711	1.0794	1.07831	1.10136	1.11368
508.426	1.05059	1.07752	1.07666	1.07895	1.10258	1.11035
507.973	1.05021	1.07706	1.07665	1.08012	1.10543	1.11354
507.521	1.05241	1.0773	1.07955	1.08029	1.10423	1.11802
507.068	1.05209	1.08015	1.07736	1.07913	1.10278	1.11474
506.464	1.0512	1.07882	1.07827	1.08083	1.10408	1.11435
506.011	1.04974	1.0784	1.07781	1.08041	1.10755	1.11499
505.558	1.05294	1.08019	1.07899	1.08052	1.10493	1.11861
504.954	1.05267	1.07937	1.07603	1.08104	1.10456	1.1166
504.502	1.05292	1.08038	1.08009	1.08215	1.10653	1.11515
504.048	1.05175	1.07895	1.07808	1.07995	1.10506	1.11624
503.444	1.05154	1.08172	1.07676	1.07993	1.10788	1.11614
502.991	1.05089	1.07989	1.08235	1.08037	1.10357	1.11797
502.538	1.05209	1.08042	1.08198	1.08467	1.10756	1.11827
501.934	1.05567	1.08304	1.08195	1.07995	1.10957	1.11944
501.48	1.05431	1.08475	1.08271	1.08651	1.10557	1.12165
501.027	1.05546	1.08391	1.08261	1.08363	1.11214	1.12098
500.574	1.05357	1.07975	1.08127	1.08331	1.10931	1.12274
499.969	1.05303	1.08649	1.08363	1.08652	1.10931	1.12181
499.516	1.05113	1.08397	1.08287	1.08528	1.10683	1.12094
499.062	1.05311	1.08399	1.08404	1.0864	1.10878	1.12381
498.457	1.05435	1.08198	1.08294	1.08295	1.10979	1.12201
498.004	1.05506	1.08606	1.08403	1.08644	1.11186	1.12261
497.55	1.05463	1.08293	1.08371	1.08754	1.1117	1.12352
496.945	1.05357	1.08346	1.08198	1.08452	1.10983	1.12396
496.491	1.05411	1.08626	1.08244	1.08492	1.11162	1.12301
496.038	1.05682	1.08586	1.08386	1.08813	1.11172	1.12238
495.432	1.05177	1.0852	1.08434	1.08571	1.1106	1.12441
494.978	1.05548	1.08771	1.08411	1.08862	1.11182	1.12454
494.525	1.05578	1.08712	1.0863	1.08711	1.11087	1.12539
494.071	1.05484	1.08649	1.08361	1.0859	1.11297	1.12513
493.465	1.05576	1.08626	1.08528	1.08537	1.11231	1.1264
493.011	1.05538	1.087	1.08488	1.08604	1.11204	1.12896
492.557	1.05607	1.08742	1.08516	1.08738	1.11402	1.1287
491.951	1.05602	1.08796	1.08452	1.088	1.11563	1.12783
491.497	1.05598	1.08736	1.08545	1.08765	1.1139	1.12753
491.043	1.05744	1.08933	1.08542	1.08899	1.11445	1.1303
490.437	1.05844	1.09051	1.08561	1.08835	1.11597	1.12963
489.983	1.05768	1.08979	1.08476	1.08874	1.11717	1.12866
489.528	1.05799	1.08981	1.08518	1.08867	1.11681	1.13108
489.074	1.05778	1.08849	1.08669	1.08918	1.11707	1.12995
488.468	1.05728	1.09038	1.08737	1.09003	1.11722	1.13215
488.013	1.05668	1.09075	1.08793	1.09039	1.11739	1.13309
487.559	1.05982	1.0909	1.08779	1.09163	1.11993	1.13316
486.952	1.05822	1.09198	1.08807	1.09049	1.11875	1.13284
486.498	1.05887	1.09235	1.0879	1.09117	1.1193	1.13365
486.043	1.05687	1.09169	1.08787	1.09046	1.11963	1.13499
485.437	1.05766	1.09336	1.08875	1.09191	1.12028	1.13646
484.982	1.05644	1.09112	1.08807	1.08998	1.1193	1.13456
484.527	1.05739	1.09242	1.08821	1.09131	1.12002	1.13533
484.072	1.05881	1.09352	1.09009	1.09272	1.12255	1.13625
483.465	1.05914	1.09329	1.09091	1.09327	1.12193	1.13623
483.01	1.05859	1.09574	1.09017	1.09301	1.12196	1.13721
482.555	1.05913	1.09461	1.09113	1.09364	1.12318	1.13709
481.948	1.06022	1.09522	1.09284	1.09334	1.12477	1.13887
481.493	1.05752	1.09388	1.0913	1.09256	1.1239	1.13852
481.038	1.06211	1.09636	1.09392	1.09416	1.12462	1.1403
480.431	1.06191	1.09538	1.09254	1.09587	1.12527	1.14099
479.976	1.06035	1.09509	1.09351	1.09375	1.12444	1.13898
479.52	1.06119	1.0981	1.09377	1.09419	1.12699	1.1406
479.065	1.06245	1.09688	1.09483	1.0941	1.1243	1.14284
478.458	1.06251	1.09599	1.09427	1.09457	1.12682	1.14029
478.002	1.0608	1.09997	1.09645	1.0951	1.12597	1.14176
477.547	1.06274	1.09603	1.09508	1.09651	1.12806	1.14053
476.939	1.06144	1.09772	1.09759	1.09862	1.12739	1.14389
476.484	1.06276	1.09605	1.09675	1.09713	1.12756	1.14426
476.028	1.0631	1.10055	1.09661	1.0973	1.12511	1.14448
475.572	1.06166	1.09946	1.09503	1.0976	1.12879	1.143
474.965	1.06413	1.1007	1.09857	1.09974	1.12858	1.14734
474.509	1.06399	1.09957	1.09848	1.09957	1.12988	1.14768
474.053	1.06143	1.09782	1.09726	1.09859	1.12663	1.1461
473.445	1.0641	1.10106	1.09811	1.1	1.13089	1.14848
472.989	1.06279	1.10081	1.09954	1.09967	1.13202	1.15013
472.533	1.06337	1.10067	1.09803	1.1005	1.13327	1.14897
471.925	1.06425	1.10204	1.09966	1.09977	1.13119	1.14701
471.469	1.06709	1.10174	1.09976	1.09933	1.13086	1.14956
471.013	1.06575	1.10121	1.10052	1.1034	1.13118	1.15024
470.557	1.06545	1.10124	1.10029	1.10165	1.13246	1.14979
469.949	1.06605	1.10329	1.10058	1.103	1.13249	1.15182
469.492	1.06494	1.10233	1.10028	1.10366	1.13076	1.15041
469.036	1.06583	1.10339	1.10185	1.10128	1.13393	1.15189
468.428	1.06523	1.1028	1.10063	1.10492	1.13416	1.15319
467.971	1.0673	1.10426	1.10063	1.10448	1.13458	1.15315
467.515	1.06598	1.10495	1.10313	1.10805	1.13325	1.15444
467.058	1.06692	1.10469	1.10159	1.10468	1.13376	1.1586
466.45	1.06702	1.10393	1.10274	1.10603	1.13548	1.15422
465.993	1.06479	1.10524	1.10227	1.10602	1.13626	1.15478
465.536	1.06637	1.10523	1.10493	1.10511	1.13545	1.15689
464.928	1.06841	1.10567	1.10522	1.10922	1.13801	1.15793
464.471	1.0662	1.10747	1.10641	1.10868	1.13828	1.15868
464.014	1.06621	1.10281	1.10545	1.11014	1.1382	1.15924
463.557	1.0655	1.10452	1.1064	1.10982	1.13731	1.15923
462.948	1.06796	1.10602	1.10538	1.10933	1.13787	1.15961
462.491	1.06892	1.10629	1.10661	1.11087	1.14025	1.16102
462.035	1.06814	1.10716	1.10734	1.10974	1.14025	1.16161
461.425	1.06726	1.10795	1.10696	1.11148	1.13933	1.16152
460.968	1.06775	1.10742	1.10707	1.10993	1.1394	1.1614
460.511	1.06779	1.1065	1.10747	1.11148	1.14028	1.16237
460.054	1.06746	1.10836	1.10791	1.1114	1.13996	1.16317
459.445	1.07021	1.10833	1.10845	1.11342	1.14174	1.16442
458.987	1.06951	1.10777	1.10979	1.11208	1.14241	1.16511
458.53	1.0691	1.10998	1.10907	1.11345	1.14349	1.16641
458.073	1.07056	1.10879	1.11025	1.11355	1.14441	1.16777
457.463	1.06992	1.10989	1.11085	1.11418	1.14533	1.16764
457.006	1.06845	1.10921	1.10941	1.11211	1.14427	1.16677
456.549	1.06878	1.10864	1.1106	1.11378	1.14583	1.16875
455.939	1.07105	1.10845	1.10917	1.11473	1.14534	1.17024
455.481	1.07097	1.11114	1.11131	1.11549	1.1439	1.17124
455.024	1.07106	1.11203	1.11124	1.11603	1.14588	1.16934
454.566	1.07078	1.10967	1.1097	1.11485	1.14293	1.16969
453.956	1.0708	1.11105	1.111	1.11754	1.14694	1.17293
453.498	1.07156	1.11117	1.11238	1.11538	1.148	1.17082
453.041	1.07041	1.11182	1.11275	1.11696	1.14829	1.17287
452.43	1.07297	1.11316	1.11372	1.1179	1.14948	1.17344
451.973	1.07156	1.11274	1.11427	1.11737	1.14873	1.17409
451.515	1.07192	1.11345	1.1158	1.11853	1.1484	1.17284
451.057	1.07146	1.11279	1.11433	1.12054	1.15155	1.17522
450.446	1.07317	1.11342	1.11369	1.12087	1.15126	1.17547
449.988	1.07163	1.11405	1.11446	1.12159	1.15165	1.17783
449.53	1.07219	1.11306	1.11542	1.12119	1.15236	1.17697
449.072	1.07216	1.1146	1.1171	1.12318	1.15299	1.17741
448.462	1.07248	1.11615	1.11641	1.12255	1.1553	1.17864
448.003	1.07378	1.11476	1.1172	1.12351	1.1547	1.18074
447.545	1.07324	1.11511	1.11705	1.12497	1.15599	1.18041
446.934	1.07427	1.11609	1.11971	1.12321	1.15628	1.18186
446.476	1.07194	1.11796	1.11876	1.12495	1.15523	1.18202
446.018	1.0749	1.11646	1.11798	1.12619	1.15637	1.18335
445.559	1.07496	1.11879	1.12058	1.12804	1.15953	1.18343
444.948	1.07435	1.11841	1.11981	1.12592	1.15743	1.1837
444.49	1.07454	1.11984	1.11902	1.12544	1.15789	1.18426
444.031	1.07651	1.12086	1.12307	1.12836	1.16123	1.18509
443.573	1.07512	1.11975	1.12127	1.12902	1.15891	1.18547
442.962	1.07555	1.12141	1.12097	1.12905	1.15837	1.18642
442.503	1.0766	1.1205	1.12308	1.12793	1.16139	1.18783
442.044	1.07618	1.12046	1.1218	1.12961	1.16292	1.18636
441.433	1.07573	1.12016	1.12337	1.12969	1.16153	1.18824
440.974	1.07678	1.11975	1.12297	1.12905	1.16232	1.18813
440.515	1.07736	1.12079	1.12451	1.12996	1.16377	1.19061
440.057	1.07658	1.12166	1.12389	1.13093	1.16501	1.19102
439.445	1.07576	1.12143	1.1243	1.13148	1.16517	1.19104
438.986	1.07657	1.12371	1.12618	1.13371	1.16498	1.19182
438.527	1.07698	1.12313	1.12462	1.1313	1.16642	1.19099
438.068	1.07852	1.12219	1.12772	1.13365	1.16845	1.19272
437.456	1.07819	1.12366	1.12592	1.13498	1.168	1.19293
436.997	1.07678	1.12369	1.12752	1.13448	1.16654	1.19422
436.538	1.07746	1.12264	1.12646	1.13541	1.16836	1.19428
435.926	1.07997	1.12391	1.12674	1.13614	1.16849	1.19697
435.467	1.08017	1.12431	1.1288	1.13807	1.17183	1.19712
435.007	1.0786	1.1248	1.12929	1.13689	1.17046	1.19501
434.548	1.07792	1.12647	1.13044	1.13828	1.17096	1.19992
433.936	1.07783	1.12572	1.12958	1.13728	1.17309	1.19836
433.477	1.078	1.12698	1.13003	1.13716	1.17346	1.20031
433.017	1.07877	1.1271	1.13094	1.13891	1.17291	1.19942
432.558	1.07888	1.12807	1.12968	1.13767	1.17281	1.19902
431.945	1.08075	1.12848	1.13142	1.13766	1.17441	1.20147
431.486	1.07984	1.12785	1.13334	1.13902	1.17502	1.20045
431.026	1.08067	1.12834	1.13287	1.14136	1.17765	1.20107
430.567	1.0819	1.12908	1.13387	1.14116	1.17731	1.20361
429.954	1.0823	1.13144	1.13483	1.14228	1.17821	1.20676
429.494	1.08055	1.12929	1.13355	1.14108	1.1775	1.20451
429.034	1.08022	1.13086	1.13363	1.14176	1.17775	1.20308
428.575	1.08136	1.13181	1.13637	1.14372	1.17885	1.20607
427.962	1.08166	1.13082	1.1361	1.14317	1.17865	1.20692
427.502	1.08052	1.13123	1.13452	1.14421	1.18086	1.20881
427.042	1.08257	1.13179	1.13629	1.14499	1.17978	1.20895
426.429	1.08296	1.13312	1.13794	1.14563	1.18159	1.21034
425.969	1.08297	1.13326	1.13869	1.14608	1.18284	1.21145
425.509	1.08204	1.13244	1.13889	1.14544	1.18119	1.2112
425.049	1.08322	1.13378	1.13842	1.14597	1.18463	1.21027
424.436	1.08318	1.13429	1.13936	1.14732	1.18346	1.2138
423.975	1.08365	1.13472	1.13892	1.14771	1.18477	1.21351
423.515	1.08411	1.13575	1.14122	1.14747	1.18636	1.21541
423.055	1.08265	1.13562	1.14084	1.14922	1.18586	1.21513
422.442	1.08313	1.13534	1.14066	1.14883	1.18716	1.21499
421.981	1.08296	1.13703	1.14176	1.15068	1.18879	1.21623
421.521	1.083	1.1366	1.14227	1.15115	1.18812	1.21804
421.061	1.08415	1.13867	1.14248	1.15084	1.18947	1.21851
420.447	1.0841	1.13782	1.14284	1.15145	1.1905	1.219
419.986	1.08315	1.13811	1.1443	1.15052	1.1897	1.21984
419.526	1.08455	1.13802	1.1432	1.15138	1.19111	1.22074
419.065	1.0838	1.14037	1.14464	1.15226	1.19092	1.22136
418.451	1.084	1.14033	1.14459	1.15243	1.19157	1.22128
417.991	1.08357	1.14067	1.14578	1.15434	1.1925	1.22225
417.53	1.08454	1.1402	1.1443	1.15387	1.19212	1.22302
417.07	1.08443	1.14055	1.14632	1.1547	1.19378	1.22362
416.455	1.08362	1.14286	1.14785	1.1541	1.19457	1.22396
415.995	1.08393	1.14232	1.14564	1.15426	1.19395	1.22487
415.534	1.08487	1.14162	1.14537	1.15392	1.19475	1.22687
415.073	1.08559	1.14413	1.1483	1.15752	1.19506	1.22899
414.459	1.08496	1.14202	1.14633	1.15505	1.19565	1.22867
413.998	1.08603	1.14272	1.14638	1.15592	1.19646	1.23002
413.537	1.08536	1.14297	1.14984	1.15772	1.20109	1.22955
413.076	1.08566	1.145	1.14874	1.15565	1.20009	1.23206
412.461	1.0873	1.14675	1.15078	1.16003	1.2015	1.2324
412	1.08774	1.14583	1.15111	1.15853	1.20071	1.23391
411.539	1.08708	1.1456	1.15103	1.16003	1.19926	1.23253
410.924	1.08643	1.14665	1.15104	1.1595	1.20205	1.23464
410.463	1.08648	1.14749	1.152	1.15954	1.20326	1.23375
410.002	1.08797	1.14815	1.15398	1.16166	1.20386	1.23593
409.541	1.08639	1.14876	1.15235	1.1595	1.20403	1.23724
408.926	1.08701	1.14644	1.15315	1.16199	1.2051	1.23828
408.464	1.08803	1.14896	1.15384	1.1623	1.20846	1.23844
408.003	1.08727	1.14744	1.15314	1.16275	1.2053	1.24073
407.542	1.08814	1.1491	1.15556	1.16159	1.20694	1.24222
406.926	1.08752	1.14971	1.1551	1.16301	1.20712	1.23914
406.465	1.08719	1.15015	1.15692	1.165	1.20833	1.24314
406.004	1.08859	1.15095	1.15647	1.16341	1.20889	1.24445
405.542	1.08852	1.15101	1.15677	1.16397	1.20917	1.24445
404.927	1.08977	1.15315	1.15639	1.16813	1.21406	1.24595
404.465	1.0889	1.1525	1.15694	1.16594	1.21037	1.24762
404.003	1.08834	1.15258	1.15825	1.16561	1.21266	1.24657
403.542	1.08994	1.1549	1.15615	1.16838	1.21386	1.24863
402.926	1.08964	1.15592	1.15888	1.16932	1.2158	1.25253
402.464	1.09036	1.15505	1.16153	1.17026	1.21618	1.25117
402.002	1.09171	1.15603	1.16059	1.16841	1.21493	1.25301
401.541	1.08874	1.1562	1.15976	1.16992	1.21648	1.25254
400.925	1.08907	1.15671	1.16107	1.16937	1.21739	1.25538
400.463	1.08991	1.15807	1.16096	1.17136	1.21764	1.2541
400.001	1.09046	1.15714	1.16108	1.17106	1.2195	1.25532
399.539	1.09012	1.15842	1.16288	1.17187	1.21841	1.25652
399.077	1.08948	1.15835	1.16163	1.17239	1.21833	1.25544
398.461	1.09002	1.15942	1.16346	1.17386	1.22199	1.25897
397.999	1.09157	1.15957	1.16274	1.17505	1.2219	1.25931
397.537	1.09048	1.16014	1.1654	1.17641	1.22316	1.26194
397.074	1.09033	1.15964	1.16549	1.17592	1.22277	1.26152
396.458	1.09178	1.16164	1.16465	1.17703	1.22571	1.25967
395.996	1.09089	1.16093	1.16614	1.17649	1.22465	1.26537
395.534	1.09165	1.16205	1.16886	1.17794	1.22608	1.26689
395.071	1.09099	1.16252	1.16606	1.17698	1.22711	1.26617
394.455	1.09218	1.1655	1.16746	1.17969	1.2293	1.26652
393.992	1.09111	1.16283	1.1666	1.18053	1.22803	1.26602
393.53	1.09362	1.16568	1.16677	1.18141	1.22977	1.26974
393.067	1.09196	1.16558	1.16852	1.17942	1.22958	1.26847
392.451	1.093	1.16697	1.16952	1.18262	1.23149	1.27109
391.988	1.09392	1.16679	1.16894	1.18289	1.23135	1.27288
391.526	1.0935	1.16794	1.16944	1.18332	1.23208	1.27225
391.063	1.09339	1.16797	1.16936	1.18275	1.23259	1.27191
390.446	1.0958	1.17152	1.17306	1.18649	1.2361	1.27514
389.983	1.09398	1.16955	1.17166	1.18549	1.23648	1.27673
389.521	1.09421	1.1712	1.17131	1.18469	1.23518	1.27508
389.058	1.0945	1.16989	1.17135	1.18651	1.23415	1.27747
388.441	1.09407	1.16993	1.17477	1.18741	1.23889	1.27854
387.978	1.09488	1.17156	1.1737	1.18565	1.2351	1.27958
387.515	1.09575	1.17071	1.17638	1.18935	1.2392	1.27946
387.052	1.0946	1.17063	1.17617	1.18826	1.23987	1.28026
386.435	1.0955	1.17228	1.17615	1.18971	1.24091	1.28235
385.972	1.09596	1.17235	1.17661	1.19106	1.2413	1.28214
385.509	1.09542	1.17355	1.17697	1.19157	1.24293	1.284
385.046	1.09644	1.17258	1.17781	1.19199	1.24287	1.28537
384.429	1.09651	1.17601	1.18019	1.19562	1.24917	1.28737
383.965	1.09644	1.17427	1.17878	1.19472	1.2479	1.28725
383.502	1.09692	1.17631	1.18053	1.19746	1.24413	1.28899
383.039	1.09696	1.17555	1.18253	1.19842	1.24939	1.29089
382.576	1.09992	1.17727	1.18062	1.19693	1.24872	1.28958
381.958	1.096	1.17543	1.18007	1.19944	1.24903	1.29308
381.495	1.09658	1.17742	1.18356	1.20263	1.25385	1.29332
381.032	1.09858	1.1798	1.18275	1.20022	1.25063	1.2928
380.568	1.09971	1.17961	1.18299	1.20239	1.25177	1.29569
379.95	1.09888	1.18034	1.18469	1.20024	1.24894	1.29255
379.487	1.09809	1.17919	1.18636	1.20293	1.25238	1.29632
379.023	1.09658	1.18	1.18372	1.20175	1.25421	1.30065
378.56	1.09938	1.18019	1.18515	1.20201	1.25397	1.29684
377.942	1.09912	1.17945	1.18684	1.20431	1.25488	1.30008
377.478	1.10106	1.17982	1.18578	1.20672	1.25879	1.30052
377.015	1.10207	1.18294	1.18722	1.20643	1.2582	1.30473
376.551	1.10162	1.18427	1.18938	1.20829	1.2609	1.30455
375.933	1.0988	1.18519	1.18958	1.20994	1.26028	1.30364
375.469	1.10081	1.18552	1.19135	1.20946	1.26381	1.30733
375.005	1.10494	1.18611	1.19237	1.21235	1.26307	1.3067
374.541	1.10305	1.18731	1.19216	1.2121	1.26459	1.30771
373.923	1.1025	1.18651	1.19464	1.21195	1.26546	1.30651
373.459	1.09989	1.18584	1.1916	1.21092	1.26676	1.30861
372.995	1.10054	1.18525	1.19514	1.20854	1.26522	1.30908
372.531	1.10486	1.18624	1.19505	1.21224	1.27153	1.31113
372.067	1.09899	1.18938	1.19474	1.21388	1.26842	1.30948
371.449	1.10292	1.19009	1.19666	1.21536	1.26839	1.31289
370.985	1.1055	1.19058	1.19649	1.21638	1.27094	1.31566
370.52	1.10178	1.19039	1.19996	1.21843	1.27108	1.31948
370.056	1.10434	1.19163	1.19872	1.2185	1.27548	1.32012
369.437	1.10671	1.1912	1.19872	1.21925	1.27926	1.32336
368.973	1.10381	1.19343	1.2006	1.22105	1.27654	1.32545
368.509	1.10458	1.19359	1.19919	1.21978	1.27494	1.32463
368.045	1.10571	1.19425	1.19976	1.21931	1.27903	1.32819
367.426	1.10387	1.19539	1.20043	1.22175	1.27618	1.32552
366.961	1.10464	1.19166	1.19923	1.22046	1.27849	1.32707
366.497	1.10552	1.19238	1.20155	1.22408	1.2752	1.32735
366.033	1.10797	1.19231	1.20079	1.22468	1.27978	1.32931
365.568	1.10738	1.19341	1.2025	1.22608	1.28356	1.33107
364.949	1.1063	1.19367	1.20519	1.22648	1.28176	1.33312
364.485	1.10481	1.19339	1.203	1.22512	1.28005	1.33143
364.02	1.10889	1.19864	1.20629	1.228	1.28613	1.33634
363.555	1.10664	1.19868	1.20555	1.22782	1.28814	1.33607
362.936	1.10719	1.19898	1.20786	1.22994	1.28831	1.33829
362.471	1.10665	1.19848	1.20835	1.23159	1.28746	1.33773
362.007	1.10794	1.19896	1.20897	1.23405	1.29125	1.33991
361.542	1.10895	1.20015	1.20973	1.23383	1.29091	1.33991
361.077	1.10797	1.20224	1.2087	1.23187	1.28973	1.34402
360.458	1.10975	1.20105	1.20844	1.23662	1.29262	1.34425
359.993	1.11076	1.20186	1.21263	1.23718	1.29526	1.34683
359.528	1.1088	1.20335	1.21137	1.2367	1.29488	1.34659
359.063	1.10971	1.20218	1.21282	1.2357	1.29595	1.34854
358.443	1.10955	1.20313	1.21166	1.23851	1.29707	1.34932
357.978	1.11071	1.20429	1.21524	1.24114	1.29754	1.35064
357.513	1.11008	1.20534	1.2148	1.24112	1.29942	1.35053
357.048	1.11053	1.20774	1.21353	1.24042	1.29903	1.35191
356.428	1.10985	1.20613	1.21508	1.24151	1.30213	1.35512
355.963	1.1121	1.20613	1.21813	1.24399	1.30399	1.35743
355.498	1.11446	1.20954	1.21931	1.24281	1.30487	1.36023
355.033	1.11232	1.20966	1.22109	1.24563	1.30686	1.35974
354.568	1.11344	1.21179	1.22056	1.24949	1.30811	1.36277
353.948	1.11284	1.21076	1.22209	1.24741	1.3044	1.36375
353.482	1.11031	1.21077	1.21973	1.24758	1.30826	1.363
353.017	1.11317	1.21195	1.22198	1.24721	1.3097	1.36511
352.552	1.11365	1.21366	1.22122	1.24774	1.30572	1.36405
351.932	1.11376	1.21409	1.22261	1.2498	1.31184	1.36494
351.466	1.10994	1.21291	1.22151	1.2493	1.31145	1.36743
351.001	1.1143	1.21417	1.22409	1.2548	1.3155	1.37231
350.535	1.11361	1.21598	1.22275	1.2519	1.31229	1.37084
350.07	1.11362	1.2176	1.2263	1.25565	1.3211	1.37553
349.449	1.11492	1.21809	1.22697	1.25426	1.32004	1.37737
348.984	1.11601	1.21876	1.22723	1.25432	1.32127	1.37586
348.518	1.11472	1.21651	1.22786	1.25555	1.32181	1.37562
348.053	1.1171	1.2178	1.23027	1.2574	1.31962	1.38119
347.432	1.11592	1.2217	1.23004	1.26097	1.32384	1.38301
346.966	1.1152	1.21931	1.22966	1.26032	1.32543	1.38299
346.5	1.11653	1.22025	1.22991	1.26152	1.32202	1.38345
346.035	1.11435	1.22139	1.23047	1.26435	1.32867	1.38385
345.569	1.11804	1.22389	1.23314	1.26492	1.32919	1.38834
344.948	1.11659	1.22448	1.23319	1.26357	1.32996	1.38834
344.482	1.11759	1.22317	1.23341	1.26334	1.32832	1.39123
344.016	1.1155	1.22579	1.23313	1.26708	1.33384	1.39153
343.55	1.11757	1.22734	1.23575	1.26964	1.33465	1.39535
342.929	1.1184	1.225	1.23564	1.26772	1.33358	1.39333
342.463	1.12053	1.22783	1.23997	1.26945	1.33389	1.39748
341.997	1.12108	1.22706	1.23746	1.26969	1.33732	1.40001
341.531	1.11767	1.22584	1.23865	1.27015	1.33816	1.40217
341.065	1.12216	1.22783	1.23978	1.27457	1.33941	1.40231
340.444	1.12104	1.22906	1.24121	1.27665	1.34462	1.40598
339.978	1.12038	1.22914	1.24221	1.27696	1.3438	1.40519
339.512	1.1213	1.2314	1.24221	1.2763	1.34406	1.40823
339.046	1.12259	1.23097	1.2432	1.28025	1.34745	1.40783
338.424	1.12377	1.23261	1.24614	1.27953	1.34612	1.4124
337.958	1.12235	1.23353	1.24629	1.2804	1.34977	1.41449
337.491	1.1205	1.23219	1.24714	1.28082	1.34731	1.41435
337.025	1.12269	1.2365	1.24787	1.28335	1.35286	1.41687
336.559	1.12338	1.23451	1.24874	1.28346	1.35377	1.41726
335.937	1.12227	1.23555	1.24976	1.28479	1.35494	1.4209
335.471	1.12258	1.23831	1.25049	1.28488	1.35962	1.4224
335.004	1.12351	1.23698	1.24946	1.28886	1.35523	1.42182
334.538	1.12499	1.23742	1.25146	1.28811	1.35902	1.42465
334.071	1.12286	1.23905	1.25121	1.28817	1.35752	1.42711
333.449	1.12256	1.2375	1.25337	1.29181	1.36188	1.42786
332.983	1.12447	1.24097	1.25312	1.29159	1.36225	1.42921
332.516	1.12598	1.24143	1.25712	1.29215	1.36532	1.4319
332.05	1.12742	1.2425	1.25653	1.29632	1.36752	1.43472
331.428	1.12707	1.24379	1.25777	1.29533	1.36878	1.43746
330.961	1.12635	1.24419	1.25998	1.29914	1.36848	1.43676
330.494	1.12846	1.24485	1.25828	1.29762	1.37185	1.44159
330.027	1.12758	1.24525	1.25896	1.29873	1.37382	1.44124
329.561	1.12716	1.24357	1.26189	1.29918	1.37569	1.44515
328.938	1.12686	1.24621	1.26301	1.30077	1.37502	1.44535
328.472	1.12511	1.24746	1.26219	1.30328	1.37667	1.4459
328.005	1.12602	1.24747	1.26521	1.30414	1.37887	1.44813
327.538	1.12825	1.24766	1.26457	1.30543	1.37919	1.44862
327.071	1.12898	1.2493	1.26714	1.30704	1.38503	1.44968
326.448	1.12968	1.24985	1.26765	1.30951	1.38511	1.45574
325.981	1.12683	1.24879	1.26576	1.31034	1.38356	1.45578
325.514	1.12897	1.25379	1.26905	1.31053	1.38795	1.45957
325.047	1.12863	1.25182	1.27092	1.31315	1.38789	1.45845
324.425	1.13124	1.25383	1.2718	1.3144	1.39122	1.46263
323.958	1.13132	1.25355	1.27236	1.31455	1.39068	1.46318
323.49	1.1311	1.25419	1.27313	1.31693	1.39133	1.46596
323.023	1.13078	1.2556	1.2725	1.31758	1.39338	1.46829
322.556	1.13123	1.25719	1.27594	1.31846	1.3974	1.47248
321.933	1.12948	1.25711	1.27574	1.32083	1.39895	1.47304
321.466	1.13102	1.25805	1.2758	1.32037	1.398	1.47617
320.999	1.13137	1.2581	1.27858	1.32311	1.40012	1.47603
320.531	1.13089	1.25876	1.27883	1.3241	1.40171	1.4793
320.064	1.1309	1.261	1.28045	1.32626	1.40375	1.48122
319.441	1.13279	1.26045	1.28271	1.32846	1.40614	1.48276
318.974	1.13185	1.26061	1.28234	1.3286	1.40544	1.48375
318.506	1.13179	1.26162	1.28261	1.32881	1.40877	1.48613
318.039	1.13485	1.26184	1.2856	1.33153	1.41063	1.48829
317.571	1.13311	1.26351	1.28569	1.33146	1.41294	1.48947
316.948	1.13337	1.26517	1.28626	1.33414	1.41274	1.49376
316.48	1.13365	1.26591	1.28793	1.33597	1.41494	1.49756
316.013	1.13427	1.2667	1.28971	1.33568	1.4179	1.49846
315.545	1.13562	1.26666	1.29147	1.33813	1.42014	1.49979
315.078	1.13479	1.2669	1.29199	1.33815	1.42014	1.50103
314.454	1.13512	1.27023	1.292	1.34002	1.42239	1.50443
313.987	1.13367	1.26926	1.29169	1.34134	1.42401	1.50446
313.519	1.13386	1.26817	1.29303	1.3417	1.42557	1.51049
313.051	1.13594	1.27177	1.29523	1.34288	1.42838	1.51261
312.427	1.1374	1.27169	1.29679	1.34467	1.43018	1.51229
311.96	1.1372	1.27169	1.29813	1.34693	1.43358	1.51471
311.492	1.1358	1.27393	1.29877	1.3495	1.43368	1.51665
311.024	1.13731	1.27356	1.29951	1.34809	1.43383	1.51875
310.556	1.13726	1.27357	1.29986	1.35095	1.43656	1.52091
309.932	1.13833	1.27599	1.30073	1.353	1.438	1.52443
309.464	1.13874	1.27661	1.30319	1.35584	1.43942	1.52723
308.996	1.13749	1.27581	1.30331	1.35596	1.44099	1.52768
308.528	1.13893	1.27803	1.30351	1.35771	1.44454	1.53038
308.06	1.14041	1.27989	1.30621	1.35786	1.44687	1.53307
307.436	1.13981	1.27832	1.30623	1.36093	1.44916	1.53452
306.968	1.13802	1.28066	1.30815	1.36349	1.4499	1.54012
306.5	1.14037	1.28261	1.30777	1.36472	1.45252	1.54289
306.032	1.14055	1.28272	1.30991	1.36409	1.45381	1.54384
305.564	1.141	1.28408	1.31131	1.36712	1.45736	1.54652
304.94	1.13949	1.28404	1.31152	1.3692	1.45713	1.549
304.471	1.13863	1.28439	1.3131	1.36914	1.45921	1.55152
304.003	1.14055	1.28565	1.3136	1.37015	1.46071	1.55411
303.535	1.14003	1.28608	1.3129	1.37273	1.46383	1.55602
303.067	1.14042	1.28651	1.31476	1.37522	1.46501	1.55759
302.442	1.14144	1.2865	1.31593	1.37575	1.46668	1.56086
301.974	1.14181	1.28886	1.31782	1.37909	1.47063	1.56407
301.505	1.14135	1.28853	1.31859	1.37855	1.47081	1.56523
301.037	1.14108	1.2892	1.31916	1.38035	1.47197	1.56833
300.568	1.14139	1.28912	1.31952	1.38277	1.47379	1.56949
299.944	1.14249	1.29072	1.32169	1.38475	1.47668	1.57183
299.475	1.14237	1.29098	1.32226	1.38566	1.47915	1.57542
299.007	1.14177	1.29187	1.32266	1.3872	1.47986	1.57686
298.538	1.14264	1.29322	1.32338	1.38911	1.48226	1.58024
298.07	1.14364	1.29479	1.32595	1.39121	1.48448	1.58349
297.445	1.14336	1.29535	1.32855	1.39304	1.48696	1.58614
296.976	1.14279	1.29599	1.32823	1.39392	1.48828	1.58968
296.508	1.142	1.29636	1.32913	1.39471	1.48892	1.59035
296.039	1.14207	1.29587	1.33038	1.39666	1.49102	1.59365
295.57	1.14183	1.29687	1.33182	1.39822	1.49243	1.59619
294.945	1.14125	1.29716	1.33296	1.39966	1.4949	1.59722
294.476	1.14209	1.29869	1.33429	1.40179	1.49773	1.6012
294.008	1.14291	1.2993	1.33477	1.40243	1.4986	1.60397
293.539	1.14219	1.30037	1.33562	1.4042	1.50024	1.60579
293.07	1.14341	1.30143	1.33676	1.40578	1.50342	1.60934
292.445	1.14288	1.3018	1.33768	1.40587	1.50525	1.60998
291.976	1.1418	1.30081	1.33931	1.40824	1.50677	1.61159
291.507	1.14102	1.30171	1.34117	1.4084	1.50963	1.61601
291.038	1.14168	1.30353	1.34152	1.41225	1.51068	1.61859
290.569	1.14333	1.30414	1.34289	1.41324	1.51259	1.62019
289.944	1.14381	1.30433	1.34468	1.41451	1.51472	1.62101
289.475	1.14419	1.30457	1.34502	1.4164	1.51701	1.62367
289.006	1.14367	1.30615	1.34503	1.41726	1.51945	1.62696
288.536	1.14351	1.30709	1.34718	1.41864	1.52021	1.62958
288.067	1.14236	1.30646	1.34738	1.41867	1.52134	1.63139
287.442	1.14345	1.30713	1.34896	1.42031	1.52388	1.63493
286.973	1.14308	1.30729	1.34968	1.42216	1.52553	1.63658
286.503	1.14229	1.30815	1.35021	1.42358	1.52754	1.6381
286.034	1.14257	1.30835	1.35092	1.42408	1.52991	1.6403
285.565	1.14237	1.30875	1.35216	1.42617	1.53135	1.643
284.939	1.14197	1.30912	1.35223	1.42605	1.53318	1.64492
284.47	1.14255	1.30992	1.35297	1.42764	1.53436	1.64627
284.001	1.14143	1.31128	1.35311	1.42798	1.53597	1.64779
283.531	1.14207	1.31055	1.35412	1.42961	1.5372	1.65169
283.062	1.14292	1.31118	1.35376	1.43087	1.53847	1.65038
282.436	1.14225	1.3122	1.35604	1.43281	1.54056	1.65348
281.967	1.14227	1.31171	1.3564	1.43526	1.54273	1.65615
281.497	1.14192	1.3117	1.35635	1.43628	1.54373	1.65742
281.028	1.14168	1.31345	1.35698	1.43717	1.54607	1.66011
280.558	1.1418	1.3127	1.35796	1.43795	1.54711	1.66302
279.932	1.14134	1.31413	1.35809	1.43838	1.54683	1.66492
279.463	1.14138	1.31416	1.35928	1.43834	1.55039	1.66644
278.993	1.14089	1.31391	1.359	1.44061	1.55133	1.66646
278.523	1.1392	1.31478	1.35887	1.44144	1.5518	1.66729
278.054	1.13956	1.3152	1.36019	1.44333	1.55522	1.67059
277.427	1.14049	1.31488	1.36083	1.4428	1.55446	1.67266
276.958	1.13832	1.31465	1.3616	1.44418	1.55742	1.67439
276.488	1.13891	1.31485	1.36195	1.44594	1.55785	1.67633
276.018	1.13871	1.31573	1.36179	1.44609	1.5596	1.67693
275.549	1.13953	1.31646	1.36298	1.44659	1.56026	1.67957
274.922	1.13759	1.31563	1.36039	1.44634	1.55996	1.67971
274.452	1.13886	1.31586	1.36302	1.44735	1.56188	1.68199
273.983	1.13843	1.31655	1.36454	1.44901	1.56312	1.68257
273.513	1.13794	1.3154	1.36262	1.44895	1.56374	1.68189
273.043	1.13661	1.31575	1.36389	1.44957	1.56517	1.68366
272.573	1.13647	1.31613	1.36311	1.44997	1.56445	1.68427
271.946	1.13692	1.31585	1.36361	1.4535	1.56736	1.68569
271.476	1.13798	1.31611	1.36372	1.45286	1.56632	1.68618
271.006	1.13711	1.31602	1.36437	1.4511	1.56734	1.68787
270.536	1.13563	1.3149	1.3632	1.45245	1.56789	1.68737
270.066	1.13444	1.31418	1.36294	1.4532	1.56705	1.68709
269.439	1.13431	1.31432	1.36434	1.45174	1.56812	1.68879
268.969	1.13484	1.31369	1.36365	1.45278	1.56721	1.6897
268.499	1.13415	1.31393	1.36337	1.45231	1.56771	1.68915
268.029	1.13363	1.31449	1.36299	1.45296	1.56921	1.69028
267.559	1.13361	1.31455	1.36298	1.45294	1.56975	1.68974
266.932	1.1332	1.3145	1.36262	1.45205	1.57043	1.69036
266.462	1.13257	1.31374	1.36232	1.45309	1.56769	1.68885
265.992	1.13254	1.31312	1.36296	1.45338	1.5689	1.68947
265.521	1.13076	1.31204	1.36086	1.45241	1.56701	1.68706
265.051	1.1303	1.31034	1.3607	1.45073	1.56698	1.68638
264.424	1.13004	1.3101	1.36093	1.45004	1.56627	1.685
263.954	1.13008	1.31009	1.36069	1.4498	1.56395	1.68541
263.483	1.12946	1.30882	1.36112	1.44938	1.56442	1.6834
263.013	1.12855	1.30929	1.35999	1.44859	1.56391	1.68237
262.542	1.1284	1.30809	1.35946	1.44735	1.56225	1.68045
262.072	1.12631	1.306	1.35755	1.44592	1.56004	1.67787
261.445	1.12548	1.30523	1.35708	1.44488	1.55894	1.67626
260.974	1.12463	1.30446	1.3562	1.44371	1.55705	1.6735
260.504	1.12432	1.30351	1.35526	1.44283	1.55466	1.67205
260.033	1.12502	1.30422	1.35476	1.44215	1.55433	1.67166
259.563	1.12327	1.30128	1.35153	1.43851	1.5501	1.66496
258.935	1.12279	1.29996	1.35131	1.43773	1.54882	1.66172
258.465	1.12129	1.29797	1.34836	1.43485	1.54481	1.65751
257.994	1.11912	1.29625	1.34618	1.43195	1.54048	1.65381
257.523	1.11867	1.29464	1.34473	1.42969	1.53806	1.64932
257.053	1.11582	1.29086	1.34094	1.42625	1.53162	1.64304
256.425	1.11566	1.29056	1.33912	1.42361	1.52944	1.63749
255.954	1.11495	1.2894	1.33745	1.42123	1.52665	1.6349
255.484	1.11318	1.28757	1.33453	1.41611	1.52059	1.62778
255.013	1.1129	1.28682	1.3337	1.41507	1.52061	1.6257
254.542	1.10927	1.28313	1.33017	1.40995	1.5128	1.61643
254.071	1.10795	1.28033	1.3276	1.40603	1.50913	1.61057
253.443	1.10427	1.27646	1.32439	1.40176	1.50204	1.60387
252.972	1.10397	1.27504	1.32193	1.39961	1.49855	1.59819
252.502	1.10416	1.27428	1.32091	1.39805	1.49579	1.59466
252.031	1.10189	1.27117	1.31658	1.3926	1.48958	1.58489
251.56	1.10018	1.26766	1.31385	1.38812	1.48427	1.57813
250.932	1.09737	1.26477	1.30994	1.38318	1.47701	1.56928
250.461	1.09558	1.26136	1.30606	1.37733	1.47133	1.56245
249.99	1.09415	1.2614	1.30382	1.37562	1.46857	1.5585
249.522	1.09204	1.25717	1.30005	1.37018	1.46114	1.54955
249.053	1.09097	1.25469	1.29674	1.36566	1.45574	1.54257
248.429	1.08863	1.25194	1.29303	1.36127	1.44892	1.53543
247.961	1.08683	1.24905	1.28925	1.35725	1.44385	1.52671
247.492	1.08677	1.24693	1.28766	1.35563	1.44063	1.52272
247.024	1.08638	1.24657	1.2851	1.3509	1.4347	1.51557
246.556	1.08297	1.24236	1.27948	1.34539	1.42715	1.50724
245.931	1.07964	1.23814	1.27496	1.33916	1.41944	1.49655
245.463	1.07655	1.23452	1.27052	1.33335	1.41279	1.4869
244.994	1.07639	1.23332	1.26872	1.33136	1.41025	1.48339
244.526	1.07329	1.22828	1.2636	1.32386	1.39974	1.47203
244.058	1.07072	1.2251	1.25985	1.31892	1.39427	1.46492
243.433	1.06955	1.22281	1.25681	1.31523	1.38976	1.45747
242.964	1.06927	1.22075	1.25299	1.30978	1.38405	1.44999
242.496	1.06661	1.21802	1.25071	1.3069	1.37991	1.44403
242.027	1.0656	1.2142	1.24659	1.30173	1.37207	1.43568
241.559	1.06419	1.21159	1.24388	1.297	1.36573	1.42957
240.934	1.06152	1.20831	1.23826	1.29138	1.3597	1.41978
240.465	1.05934	1.20639	1.23498	1.28705	1.35242	1.41251
239.997	1.05852	1.20172	1.23044	1.28289	1.34686	1.40608
239.528	1.05685	1.19911	1.22583	1.27605	1.34019	1.39576
239.059	1.05525	1.19713	1.22402	1.27389	1.33659	1.39249
238.434	1.05102	1.19199	1.21847	1.2674	1.32815	1.38147
237.966	1.04862	1.19034	1.21559	1.26299	1.32268	1.3741
237.497	1.04712	1.18632	1.21142	1.25783	1.31644	1.3672
237.028	1.0462	1.18558	1.20777	1.25306	1.3118	1.35983
236.559	1.04465	1.18278	1.20391	1.25021	1.30599	1.3528
235.934	1.04142	1.17889	1.199	1.24403	1.29852	1.34296
235.465	1.0407	1.17748	1.1955	1.23832	1.29265	1.33774
234.997	1.04041	1.17691	1.19343	1.23744	1.28904	1.33328
234.528	1.03827	1.17453	1.18828	1.23068	1.28298	1.32544
234.059	1.03632	1.17137	1.18702	1.2281	1.27831	1.32033
233.434	1.03366	1.16965	1.18188	1.22499	1.27183	1.31215
232.965	1.03114	1.1661	1.1769	1.21678	1.26302	1.30158
232.496	1.02992	1.16448	1.17495	1.21539	1.26156	1.29789
232.027	1.02789	1.16028	1.17045	1.20829	1.2524	1.28863
231.558	1.02408	1.15833	1.16662	1.20402	1.24474	1.28274
230.932	1.02087	1.15301	1.16261	1.19886	1.23856	1.27215
230.463	1.01932	1.15182	1.15847	1.19605	1.23422	1.26615
229.994	1.02122	1.15147	1.15867	1.19517	1.23282	1.26272
229.525	1.01885	1.14716	1.15332	1.18993	1.22334	1.25708
229.056	1.02037	1.1486	1.15289	1.19178	1.22301	1.25231
228.43	1.01469	1.14594	1.14846	1.18405	1.21445	1.24478
227.961	1.01313	1.14187	1.14403	1.17966	1.20837	1.23607
227.492	1.01155	1.1396	1.14097	1.17736	1.20297	1.23145
227.023	1.00974	1.13555	1.13635	1.17295	1.19558	1.22286
226.554	1.007	1.13306	1.13348	1.17044	1.19081	1.21763
225.928	1.00433	1.13086	1.1291	1.16689	1.18498	1.21112
225.459	1.00207	1.12813	1.12592	1.16469	1.1803	1.20374
224.989	1.00119	1.12489	1.12396	1.16283	1.17606	1.20013
224.52	0.99949	1.12087	1.11882	1.1597	1.1681	1.19256
224.051	0.99837	1.11915	1.11685	1.15767	1.16498	1.18842
223.425	0.9952	1.11483	1.11251	1.15498	1.15697	1.18064
222.956	0.99308	1.11128	1.10942	1.15309	1.15241	1.17372
222.486	0.99081	1.10895	1.10688	1.15182	1.14797	1.16888
222.017	0.98768	1.10471	1.1022	1.14899	1.14104	1.16071
221.547	0.9853	1.10118	1.0989	1.14737	1.13473	1.1549
221.078	0.98431	1.10061	1.09693	1.14742	1.13286	1.15368
220.452	0.98063	1.09434	1.09215	1.145	1.12461	1.14318
219.983	0.98006	1.0949	1.09135	1.14665	1.12161	1.14089
219.513	0.97674	1.08978	1.0862	1.14668	1.11318	1.13264
219.044	0.97291	1.0872	1.08257	1.1423	1.10556	1.12589
218.574	0.97375	1.08542	1.08231	1.14702	1.1061	1.12529
217.948	0.97004	1.08082	1.07778	1.14886	1.09851	1.11394
217.478	0.96827	1.08207	1.07648	1.15239	1.09584	1.11391
217.009	0.96481	1.0774	1.0722	1.15311	1.09085	1.1072
216.539	0.96344	1.07268	1.0689	1.15266	1.08435	1.10189
216.069	0.96331	1.07419	1.06971	1.15678	1.07763	1.09687
215.443	0.95979	1.07044	1.06418	1.16182	1.07127	1.08986
214.974	0.95802	1.06533	1.06234	1.16169	1.06937	1.0847
214.504	0.95885	1.06345	1.06163	1.17125	1.06363	1.07949
214.034	0.9594	1.06342	1.06299	1.177	1.06331	1.07887
213.564	0.95295	1.06201	1.06098	1.17701	1.0584	1.07526
212.938	0.94916	1.05879	1.05557	1.18809	1.05096	1.06521
212.468	0.95007	1.05914	1.05507	1.18988	1.04913	1.06635
211.998	0.9486	1.05511	1.05355	1.1955	1.04118	1.06139
211.529	0.94885	1.05474	1.05161	1.20534	1.0412	1.05701
211.059	0.94941	1.05495	1.05173	1.2127	1.0395	1.04912
210.432	0.94485	1.04593	1.04486	1.21052	1.02827	1.04978
209.962	0.94433	1.04736	1.04857	1.22895	1.02998	1.04359
209.493	0.94334	1.04388	1.04747	1.23313	1.02505	1.04109
209.023	0.94286	1.04175	1.05153	1.24483	1.02168	1.03765
208.553	0.93283	1.03652	1.0467	1.24649	1.01631	1.04135
207.926	0.9346	1.03656	1.04065	1.26682	1.01091	1.02749
207.456	0.92717	1.02299	1.03456	1.26101	1.00314	1.01454
206.986	0.91445	1.02168	1.03533	1.2645	1.00095	1.01259
206.516	0.92693	1.01518	1.04258	1.28345	0.99565	1.00255
206.046	0.93227	1.01802	1.04276	1.29684	1.01305	1.00509
205.576	0.94059	1.02549	1.04582	1.30094	1.01302	1.00919
204.949	0.90807	0.99746	1.0272	1.30082	0.96314	1.00218
204.479	0.91896	1.01014	1.03379	1.32293	0.99492	0.99536
204.009	0.91462	1.00427	1.03142	1.34287	1.01688	1.00739
203.539	0.93758	1.03668	1.04836	1.3634	1.02978	1.04601
203.069	0.93678	1.02767	1.06141	1.39042	1.05262	1.01967
202.442	0.92392	1.03523	1.08319	1.42234	1.06008	1.0358
201.972	0.95192	1.04425	1.10133	1.46957	1.0885	1.03746
201.501	0.93209	0.99622	1.06633	1.37989	1.08349	1.00588
201.031	0.93457	1.05066	1.0927	1.40024	1.10408	1.08281
200.561	0.92789	1.05265	1.15137	1.45044	1.0542	1.10745
199.933	0.89847	0.99094	1.1298	1.37774	0.96368	0.9836

## Sheet: Fig1E
Nanosheet Thickness	Nanosheet Length	Nanosheet Thickness	Nanosheet Length	Nanosheet Thickness	Nanosheet Length	Nanosheet Thickness	Nanosheet Length	Nanosheet Thickness	Nanosheet Length	Nanosheet Thickness	Nanosheet Length
nm	nm	nm	nm	nm	nm	nm	nm	nm	nm	nm	nm
0.5 to 1 k	0.5 to 1 k	1 to 1.5 k	1 to 1.5 k	1.5 to 2 k	1.5 to 2 k	2 to 3 k	2 to 3 k	3 to 4 k	3 to 4 k	4 to 6 k	4 to 6 k
13.079	3859	27.0789	1742	4.97368	1121	5.89474	691	0.73684	237	2.94737	303
17.5	521	8.47368	1112	12.3421	738	4.60526	857	1.65789	145	6.63158	396
22.4737	1426	10.1316	1184.15	11.2368	685	6.81579	774	2.21053	722	4.78947	546
24.3158	2566	10.1316	1001	13.079	1412	3.86842	724	3.68421	330	2.57895	681
22.8421	1311	8.47368	1818	14.3684	928	6.44737	694	3.5	469	2.39474	522
19.8947	1587	22.8421	1188	12.3421	1061	4.42105	1052	3.86842	526	3.68421	517.466
22.4737	1962	21	1636	9.94737	987	6.81579	697	2.94737	145	3.13158	424
18.6053	2340	9.02632	2208	11.2368	582	5.15789	658	5.89474	628	3.31579	318
28	2205	7.18421	1839	11.2368	660	3.31579	623.401	9.21053	475	3.86842	694
28	1575	9.39474	2056	11.421	700	4.05263	651.451	6.26316	870	4.42105	463
21.9211	1659	23.3947	937	10.1316	611	4.42105	918	4.05263	720	4.60526	525
22.6579	2623	13.6316	588	6.26316	341	11.0526	736	4.42105	236.316	3.68421	383
15.8421	1014	11.7895	2535	5.71053	538.557	6.81579	509	3.5	1022	5.34211	592
11.9737	1653	11.2368	1603.97	5.34211	962	6.81579	927	5.34211	568	4.78947	539.275
27.2632	3518	14.5526	1632.67	7.36842	806	7	738	5.71053	331	3.5	557
35.5526	2087	10.5	2156	9.39474	809	5.52632	690.43	5.89474	442	2.57895	606
23.0263	996	30.2105	1121	9.94737	550	6.07895	556	6.07895	564	3.68421	557
17.5	1264	13.4474	1406	10.6842	1331	14	545.339	4.05263	882	3.86842	534.061
13.8158	1638	14	766	13.6316	1278	6.07895	1050	3.13158	320	3.13158	188
21.1842	2060	8.65789	986	13.079	773	3.68421	644	2.94737	529	2.94737	257
32.0526	1372	11.6053	1064.45	9.94737	920	6.81579	864	4.42105	397	2.94737	786
23.9474	866	10.1316	1709	9.57895	939	5.34211	922	8.10526	795	2.57895	522.251
10.8684	1013	9.21053	1300	10.1316	1961	8.10526	926	5.71053	181	3.86842	392
21	1403	7.55263	1664	9.02632	1478	4.97368	852	3.5	268	3.86842	563
41.0789	1831	12.1579	1310	9.39474	1162	3.13158	875	3.68421	367	2.76316	390
29.1053	1187.2	10.8684	2045.02	10.1316	607	4.78947	692	5.89474	633	7	287.474
42.5526	1184	11.0526	1244	12.1579	757	5.15789	518	6.44737	1088	3.5	486.412
35.7368	1527	7.36842	1163.02	14.3684	1856	4.23684	1073	5.34211	326	4.23684	385
23.2105	2725	9.94737	1718	16.2105	1321	6.07895	1083	4.42105	428	4.05263	395
15.1053	1308.44	10.8684	643.897	14.7368	952	4.78947	1007	4.42105	689	3.86842	419
22.2895	1049	12.8947	1046.82	10.1316	614	6.07895	734	6.07895	508	4.05263	348
16.9474	1638	20.8158	2258	5.52632	426	4.97368	795	4.78947	414	3.5	233
20.4474	1839	11.7895	2036	4.42105	346	5.52632	1125	4.60526	770	4.60526	676
23.3947	933	14.3684	1638.63	3.86842	573	7.55263	953	5.15789	796	1.65789	420
25.7895	540	7.55263	2690	4.78947	386	8.84211	515	3.13158	474	4.97368	435
25.6053	2947	14.5526	1325	2.57895	570	14.3684	516	4.23684	261	5.15789	532
47.1579	3350	11.6053	1615.99	0.73684	154	6.26316	356	3.68421	332	4.78947	343
27.8158	2085	11.0526	1766	1.84211	380	3.31579	605	3.31579	291.292	4.60526	508
20.0789	857	23.0263	1308.9	2.76316	273.263	4.78947	546	2.39474	84.8479	4.60526	499
15.4737	1557	18.6053	763	8.47368	761	5.34211	549	6.07895	650	1.65789	437
24.3158	1497	10.5	2237	11.6053	742	5.34211	868	8.84211	266	2.94737	629
6.63158	909	7.73684	1199.12	9.39474	395	6.07895	708	3.68421	237	3.86842	757
13.6316	553	11.7895	2935	5.89474	273	7	791	2.76316	596	2.57895	269
13.2632	625	9.02632	1531	4.23684	1178.9	4.42105	847	1.84211	184	3.5	552
12.1579	1004	11.421	1277.73	13.6316	691	6.26316	659	3.5	355	4.97368	538
14	1915	26.7105	2369	12.3421	1660	7.36842	737	5.71053	389	3.5	389
14.1842	1054	14	1112	11.0526	1287	7	446	5.52632	439.552	4.05263	353
20.0789	1655	13.6316	1791.68	11.2368	948	7.73684	993	6.81579	554	3.68421	305.642
20.8158	1001	12.5263	1770	7.92105	1368	6.07895	813	5.71053	440.233	2.76316	509
15.6579	541.349	9.21053	1743.34	9.94737	808	4.60526	903	4.05263	883	4.23684	283
17.8684	1170	10.1316	2044	9.57895	1258	5.52632	941.297	3.86842	357	3.31579	721
14.1842	543	6.07895	1460	6.44737	887	7	855	3.5	348	2.57895	471
11.2368	1162.89	7.92105	2744	4.60526	664	5.71053	897	4.23684	366	1.84211	496
12.1579	460	12.5263	2718	9.94737	1052	5.71053	644	4.97368	329	0.92105	612
11.421	1620	15.1053	1814.87	10.1316	1196	5.52632	528	5.89474	502	5.89474	265.797
20.8158	1564	16.3947	2185	9.94737	1041	4.78947	985	7.36842	376	3.86842	616
21.3684	1886	12.5263	2860	13.8158	651	6.07895	965	5.34211	418	3.5	529
13.6316	1406	31.3158	2010	10.8684	992	7.92105	584	3.86842	215	4.23684	311
18.6053	1962	26.5263	2062	10.1316	1029	12.1579	864	3.31579	553	2.76316	527
27.0789	1057	14.3684	1127	11.9737	748	10.1316	599	4.23684	181	1.84211	304
16.5789	844	22.8421	1238.2	12.3421	1002	4.97368	706	3.86842	204	7	472
17.6842	1270	30.9474	1350.67	11.9737	761	6.81579	810	4.97368	420	4.60526	342
29.8421	1524	23.2105	462	15.8421	545	5.34211	922.859	4.97368	178	4.05263	767.003
24.1316	1102	14.3684	1196.96	13.8158	962	9.57895	705.819	5.52632	444	3.86842	633
17.5	1318	18.2368	1395.63	8.65789	1569	8.10526	731.519	2.39474	622	3.31579	620
24.1316	1335	8.28947	528	8.47368	1225	6.63158	644.728	6.07895	592	1.84211	470.234
26.8947	1915	15.4737	1352	10.5	1034	4.05263	974	4.23684	450	2.57895	544
23.0263	1156.16	10.5	1269	14.1842	790	4.42105	584	3.5	209.624	4.23684	304.028
12.7105	1383	20.0789	1519	11.6053	578	5.15789	443	5.89474	737	3.5	469
13.4474	629	13.8158	1656	3.86842	772	6.63158	736	7.36842	958	2.94737	585
24.3158	844.146	12.7105	1326	9.76316	753	7.92105	708	6.07895	403	1.84211	467
16.3947	448	10.8684	1859	14.1842	629	11.9737	768	6.07895	593	2.39474	831
10.8684	1523	13.8158	399	9.39474	427	6.26316	449.109	3.86842	233	2.94737	479.886
15.8421	911	8.10526	1158	9.21053	736	2.39474	970	2.94737	690	2.94737	383
12.3421	2523	10.1316	1228	14	549	3.86842	912	3.5	1291	3.86842	557.811
25.7895	1010	9.76316	1662	16.2105	789	6.63158	489	4.05263	472	4.97368	538
30.5789	1839	9.39474	1291	12.7105	582	8.28947	774	5.89474	951	2.57895	339
22.2895	987	9.02632	1162	6.44737	2158	6.26316	701.59	5.15789	474	1.47368	303
20.4474	1780	15.6579	293	19.1579	887	3.13158	806	4.78947	1268	2.39474	456
27.2632	2223	8.28947	1589	18.9737	625	5.89474	680	6.63158	526	3.86842	486
31.6842	2341	7.36842	1118.68	15.2895	2434	9.76316	786	3.13158	540	3.31579	849
25.7895	1171	10.8684	532	20.0789	1857	9.57895	580	4.60526	752	5.34211	542
11.2368	944	10.8684	690.66	31.8684	1297	4.42105	562	6.07895	342	2.21053	500
20.8158	930	5.34211	550	15.2895	738	6.81579	458	7	673.792	2.21053	556
14.5526	640.978	7.92105	622.893	17.3158	620	5.15789	1022	8.84211	893	4.60526	423
15.1053	607.443	5.71053	783	4.23684	675	5.34211	786	7	383	2.57895	399.474
11.7895	1552	7	329	5.71053	482	5.15789	813	6.44737	619	2.57895	896
14.5526	764	6.26316	624.545	2.21053	233	6.44737	788	6.07895	528	5.15789	858
11.421	846	7.55263	834.864	3.68421	435	6.63158	581	9.02632	1043	4.60526	596
22.6579	1961	17.6842	734	5.52632	828	6.26316	580.96	7.92105	637	4.05263	577.044
25.6053	1461	11.9737	1474.23	7.18421	872	5.15789	440	4.05263	376	4.23684	341
18.7895	1381	6.26316	1021	9.76316	1015	6.81579	939	3.68421	628	2.76316	308
22.1053	1609.17	7.18421	1263	5.52632	770	7.36842	775	11.0526	450	2.76316	403
28.7368	1136	12.7105	1263	4.42105	650	5.52632	589	9.94737	453	3.86842	231
19.1579	1020	12.5263	1401	8.47368	993	7.18421	658	3.68421	539	2.76316	623
24.1316	2019	20.0789	1146.34	9.21053	864	8.47368	1146	2.57895	377	2.76316	476
21.1842	778	9.21053	853	5.89474	494	5.15789	1121	6.81579	768	2.76316	232
9.21053	923	8.10526	856.915	4.97368	441	3.86842	513	10.3158	392	0.92105	350
10.8684	852	11.9737	1229	5.89474	1179	5.89474	1004	6.44737	409	3.13158	351
22.6579	1325	6.07895	1707	10.8684	578	5.71053	470	6.63158	783	3.68421	260
34.4474	1716	6.81579	680	7.18421	631	5.34211	685	6.26316	613	4.23684	582
23.9474	1806	6.26316	796	6.63158	1169	8.28947	652	7.55263	390	5.34211	538
15.4737	548.812	7.36842	1006	5.71053	599	11.2368	658	5.89474	264	1.84211	319
10.1316	467	10.6842	1822.96	7	1051	7.18421	897.685	6.44737	420	3.5	373
12.7105	1098	6.07895	1002.03	8.10526	433	5.34211	579.552	5.15789	487	3.68421	432
13.6316	2168	10.3158	590	6.63158	456	10.5	658.544	4.42105	336	3.86842	463
21.7368	1483	8.10526	935.7	6.63158	579	9.21053	807.118	3.86842	795	2.94737	277
21.7368	2736	8.47368	1306	7.36842	509.84	5.15789	635	7.18421	457	1.84211	456
33.3421	1157.45	13.2632	322.225	8.10526	1699.91	5.15789	1121	4.23684	259	2.76316	289
24.3158	1319	7.73684	1557	9.94737	656	2.02632	1140	5.34211	704	2.39474	436
15.4737	1304	8.47368	460	9.57895	869	5.52632	648.021	5.71053	411	4.23684	436
17.8684	2168	8.65789	1978	5.89474	432	6.81579	651	5.89474	301	5.71053	168
26.7105	2098	9.76316	942.157	6.63158	952	4.23684	823	6.07895	1062	1.65789	287
25.0526	2159.89	7.73684	1410	1.28947	431	5.15789	617	6.81579	673	2.39474	229.674
25.4211	2160.8	8.47368	1494.89	6.26316	692	3.86842	440.822	11.0526	396	1.65789	376
12.8947	2246	5.15789	1067	12.3421	862	2.02632	559	10.1316	622	1.84211	319
27.2632	2763	7.36842	1440	12.5263	708	4.97368	754	9.76316	492	2.02632	410.218
24.3158	2747	8.47368	1595	6.07895	786	10.8684	867	8.28947	1758	3.31579	702
18.4211	999	6.07895	1897	5.71053	554	5.15789	662	7.36842	446	2.21053	583
22.1053	1968	9.76316	517.066	9.76316	616	6.26316	661	8.10526	426	1.47368	425
16.9474	921	11.7895	1969	12.1579	644	7.92105	1035	6.07895	892.205	1.10526	285
22.1053	1567	12.8947	629	9.39474	622	9.02632	500.513	7.92105	419	2.94737	613
18.6053	917.581	6.44737	1193	9.94737	456	4.97368	1039	6.81579	595	2.76316	356
33.5263	1724	11.9737	672	10.3158	804.014	2.39474	1419.87	8.84211	387	2.21053	361
22.4737	1539	14.7368	1840	11.421	534	6.81579	1101	7.55263	524	4.97368	678
17.6842	1291.42	3.13158	1654	9.76316	1223	4.78947	942.185	3.68421	565	3.86842	197
16.7632	1715	8.84211	1747	11.9737	911	5.89474	817	3.5	302	2.76316	405
15.4737	1022	8.10526	1537	8.28947	794	7.55263	557	5.15789	641	1.28947	224
10.1316	916	10.5	1274	9.76316	791	4.60526	940	5.89474	203	1.65789	282
17.3158	1262.83	7.36842	1320	9.57895	478	8.28947	589	2.94737	206	2.39474	296
17.3158	1384	9.39474	1206	6.44737	748	6.63158	508.894	2.57895	743	2.57895	960
8.65789	1699	8.28947	763.78	4.05263	638	6.81579	573	4.97368	300	2.21053	373
12.1579	889.428	8.65789	791	5.71053	618	3.86842	776	4.97368	411.421	2.02632	685
7.55263	1381	11.0526	1449	8.65789	956	4.78947	927	9.02632	674	1.10526	345
11.421	1711	8.47368	743.72	7.18421	675	3.5	599.149	12.7105	1085	2.94737	511
7.18421	1099	6.81579	456.4	8.10526	762	6.07895	1036	8.10526	297.297	2.39474	382
6.44737	462	6.26316	976.34	7.92105	687	5.34211	970.537	2.02632	591	2.39474	317
16.5789	1172.15	8.47368	396.88	7.55263	443	5.15789	621	4.42105	726	1.65789	563
9.39474	1773	8.65789	989.42	7.36842	503	6.26316	1074	1.28947	414.73	3.31579	241
17.5	2074	7.55263	935.137	6.26316	302	10.1316	1193	3.68421	288	3.13158	559
14	2166	16.3947	1439.29	4.97368	518	2.02632	968.523	3.13158	598	3.31579	680
20.6316	1403	11.2368	1156.95	7.55263	1270	5.34211	1171	3.13158	322	3.86842	207.43
19.1579	1217	6.44737	469.256	14.7368	1345	7.55263	540.929	3.13158	379	3.5	357
25.6053	2352	9.57895	350.292	17.8684	1100	9.39474	542	2.57895	321	3.13158	522
17.6842	919	8.65789	576.961	6.81579	1231	6.44737	309.927	2.94737	369.517	2.21053	298
7.73684	3632	7.36842	590.383	6.44737	705	7.55263	829.036	3.13158	533	4.23684	256
20.2632	688	8.65789	850.955	12.8947	704	6.07895	858	2.76316	690	2.94737	257
10.6842	2050.85	7.55263	521.813	24.8684	1134	2.39474	879	3.86842	282	2.57895	236.929
10.8684	2114			21.7368	838	8.28947	730	3.13158	211	3.31579	635
17.8684	1546			11.421	1373	5.15789	761	2.57895	421	2.39474	324.233
17.6842	2756			9.94737	829	5.15789	879.538	4.97368	515	0.92105	260.449
19.5263	2575			23.0263	936	5.52632	614.397	6.07895	508	2.02632	144
35.7368	1926			12.5263	981	4.78947	1090	7.92105	384	1.65789	428
28.3684	864			11.7895	1342	4.97368	714.873	7.73684	380	4.23684	519
12.5263	1052			13.079	925	8.10526	798	4.05263	836	2.57895	370
6.81579	1514			7.73684	679	9.57895	753	4.97368	379	3.13158	561
17.8684	2047			11.9737	928	9.21053	669	4.78947	703	1.84211	380
18.7895	1644			12.8947	741	5.71053	793.984	3.13158	235	2.39474	405
21	1007			13.6316	704	5.15789	349.359	2.57895	381	2.21053	579
				4.60526	1633	6.26316	732	4.78947	370	2.76316	225
				7.92105	931	4.78947	951	5.15789	585	3.31579	474
				8.84211	949			2.76316	314
				7.55263	710			3.31579	411
				7.92105	1143			4.42105	441
				12.5263	621			2.94737	201
				11.421	661			2.57895	402
				6.81579	556			3.13158	414
				5.71053	914			2.94737	370
				4.42105	1164			2.94737	622
				5.15789	1104			4.05263	663
				4.97368	424			2.02632	384
				5.71053	392			4.78947	421
				8.10526	849			4.23684	496
				9.21053	802			3.31579	331
				8.65789	901.031			1.65789	408
				6.07895	886			3.68421	1040
				6.07895	379			4.05263	316
				5.15789	745			3.68421	796
				9.57895	1189			3.5	320
				14.1842	850			3.13158	971
				8.65789	691			3.13158	490
				6.44737	321			3.68421	382
				9.94737	740			3.31579	350
				12.8947	518			4.05263	794
								3.5	664
								3.68421	567
								3.31579	607
								3.31579	252
								3.5	693
								4.05263	510
								5.34211	657
								4.60526	246.677
								4.05263	256
								3.13158	245
								4.60526	315
								5.71053	294

## Sheet: Fig1F&G
rpm	Mean nanosheet length	std dev	mean nanosheet thickness	std dev
	nm	nm	nm	nm
			--	--
1000	1500.58	667.1	19.7476	7.28355
1500	1304.75	575.091	11.5555	5.52042
2000	834.986	363.565	9.56393	4.01063
3000	761.907	199.556	6.22082	2.11313
4000	504.222	242.704	4.92481	1.83221
6000	451.98	158.188	3.24142	1.16365

## Sheet: Fig2B
Wavenumber	Intensity		Wavenumber	Intensity		Wavenumber	Intensity		Wavenumber	Intensity		Wavenumber	Intensity		Wavenumber	Intensity
cm\+(-1)			cm\+(-1)			cm\+(-1)			cm\+(-1)			cm\+(-1)			cm\+(-1)
	0.5 to 1 k			1 to 1.5 k			1.5 to 2 k			2 to 3 k			3 to 4 k			4 to 6 k
3200.77	27.5053		3200.77	21.8333		3200.77	16.7552		3200.77	11.9885		3200.77	6.80133		3200.77	1.73175
3199.47	26.5512		3199.47	21.1975		3199.47	16.2037		3199.47	11.2948		3199.47	6.3018		3199.47	1.19704
3198.17	26.5946		3198.17	21.3303		3198.17	16.2854		3198.17	11.2663		3198.17	6.32577		3198.17	1.16232
3196.88	26.4705		3196.88	21.2562		3196.88	16.3135		3196.88	11.395		3196.88	6.38604		3196.88	1.11727
3195.57	26.543		3195.57	21.2067		3195.57	16.2251		3195.57	11.3142		3195.57	6.32526		3195.57	1.1998
3194.27	26.5646		3194.27	21.2212		3194.27	16.2186		3194.27	11.3623		3194.27	6.33408		3194.27	1.21336
3192.97	26.4479		3192.97	21.285		3192.97	16.2341		3192.97	11.3137		3192.97	6.2945		3192.97	1.0925
3191.67	26.3457		3191.67	21.334		3191.67	16.1866		3191.67	11.3013		3191.67	6.28821		3191.67	1.18877
3190.37	26.4764		3190.37	21.2107		3190.37	16.2777		3190.37	11.3414		3190.37	6.33936		3190.37	1.18855
3189.07	26.5561		3189.07	21.2892		3189.07	16.1988		3189.07	11.3532		3189.07	6.25749		3189.07	1.13665
3187.77	26.4031		3187.77	21.1266		3187.77	16.2583		3187.77	11.3328		3187.77	6.32675		3187.77	1.20187
3186.46	26.2866		3186.46	21.2936		3186.46	16.2926		3186.46	11.2721		3186.46	6.23585		3186.46	1.23262
3185.16	26.3372		3185.16	21.2835		3185.16	16.283		3185.16	11.3242		3185.16	6.31416		3185.16	1.21173
3183.86	26.366		3183.86	21.239		3183.86	16.2481		3183.86	11.4045		3183.86	6.37734		3183.86	1.20117
3182.56	26.5982		3182.56	21.3322		3182.56	16.2133		3182.56	11.3277		3182.56	6.31366		3182.56	1.30418
3181.25	26.4454		3181.25	21.1501		3181.25	16.3325		3181.25	11.3436		3181.25	6.26811		3181.25	1.30737
3179.95	26.4814		3179.95	21.2432		3179.95	16.3385		3179.95	11.3554		3179.95	6.36145		3179.95	1.30367
3178.65	26.5392		3178.65	21.2774		3178.65	16.2786		3178.65	11.4355		3178.65	6.34912		3178.65	1.27247
3177.34	26.4155		3177.34	21.1936		3177.34	16.2092		3177.34	11.3187		3177.34	6.33981		3177.34	1.19314
3176.04	26.5241		3176.04	21.2229		3176.04	16.3095		3176.04	11.2782		3176.04	6.3486		3176.04	1.25823
3174.73	26.5456		3174.73	21.203		3174.73	16.3501		3174.73	11.3583		3174.73	6.37247		3174.73	1.27518
3173.43	26.6396		3173.43	21.3108		3173.43	16.2964		3173.43	11.3541		3173.43	6.34507		3173.43	1.23713
3172.12	26.516		3172.12	21.2712		3172.12	16.2554		3172.12	11.3619		3172.12	6.39908		3172.12	1.22315
3170.82	26.5229		3170.82	21.3937		3170.82	16.3273		3170.82	11.3214		3170.82	6.39278		3170.82	1.18513
3169.51	26.5371		3169.51	21.3542		3169.51	16.3553		3169.51	11.4657		3169.51	6.31113		3169.51	1.1746
3168.21	26.4643		3168.21	21.3098		3168.21	16.2892		3168.21	11.3972		3168.21	6.25965		3168.21	1.26365
3166.9	26.551		3166.9	21.2654		3166.9	16.2983		3166.9	11.4571		3166.9	6.32871		3166.9	1.17758
3165.59	26.5942		3165.59	21.3681		3165.59	16.2699		3165.59	11.4408		3165.59	6.3887		3165.59	1.21854
3164.29	26.4563		3164.29	21.2796		3164.29	16.2696		3164.29	11.3161		3164.29	6.28603		3164.29	1.20458
3162.98	26.427		3162.98	21.3676		3162.98	16.2945		3162.98	11.3801		3162.98	6.31289		3162.98	1.24895
3161.67	26.5354		3161.67	21.3085		3161.67	16.2347		3161.67	11.456		3161.67	6.30661		3161.67	1.20755
3160.37	26.5423		3160.37	21.4014		3160.37	16.272		3160.37	11.2953		3160.37	6.34248		3160.37	1.12157
3159.06	26.3755		3159.06	21.3962		3159.06	16.2561		3159.06	11.3673		3159.06	6.35125		3159.06	1.1968
3157.75	26.4983		3157.75	21.4547		3157.75	16.2997		3157.75	11.387		3157.75	6.38409		3157.75	1.14857
3156.44	26.5052		3156.44	21.2585		3156.44	16.2181		3156.44	11.3267		3156.44	6.21837		3156.44	1.1792
3155.13	26.4832		3155.13	21.2436		3155.13	16.2366		3155.13	11.3504		3155.13	6.3625		3155.13	1.18582
3153.83	26.2804		3153.83	21.3853		3153.83	16.2207		3153.83	11.3702		3153.83	6.33518		3153.83	1.30553
3152.52	26.4899		3152.52	21.2872		3152.52	16.2173		3152.52	11.2818		3152.52	6.26276		3152.52	1.25046
3151.21	26.4028		3151.21	21.2674		3151.21	16.3704		3151.21	11.3216		3151.21	6.31062		3151.21	1.23994
3149.9	26.4098		3149.9	21.3062		3149.9	16.2169		3149.9	11.3134		3149.9	6.28031		3149.9	1.23628
3148.59	26.5107		3148.59	21.1641		3148.59	16.3011		3148.59	11.3571		3148.59	6.34317		3148.59	1.19496
3147.28	26.5393		3147.28	21.2226		3147.28	16.2227		3147.28	11.4129		3147.28	6.25578		3147.28	1.20842
3145.97	26.4885		3145.97	21.2028		3145.97	16.2725		3145.97	11.3806		3145.97	6.30961		3145.97	1.24926
3144.66	26.5604		3144.66	21.3394		3144.66	16.2847		3144.66	11.3764		3144.66	6.30035		3144.66	1.20453
3143.35	26.5023		3143.35	21.2806		3143.35	16.3126		3143.35	11.3321		3143.35	6.32111		3143.35	1.17351
3142.04	26.4659		3142.04	21.251		3142.04	16.3155		3142.04	11.3918		3142.04	6.31185		3142.04	1.22459
3140.73	26.4512		3140.73	21.3729		3140.73	16.259		3140.73	11.3076		3140.73	6.32061		3140.73	1.2654
3139.42	26.5953		3139.42	21.2358		3139.42	16.2681		3139.42	11.3153		3139.42	6.32035		3139.42	1.24122
3138.1	26.494		3138.1	21.1916		3138.1	16.2117		3138.1	11.435		3138.1	6.28109		3138.1	1.17602
3136.79	26.3494		3136.79	21.2256		3136.79	16.2739		3136.79	11.2669		3136.79	6.33184		3136.79	1.15187
3135.48	26.4357		3135.48	21.3377		3135.48	16.2237		3135.48	11.3306		3135.48	6.30159		3135.48	1.1619
3134.17	26.4715		3134.17	21.2593		3134.17	16.2484		3134.17	11.3303		3134.17	6.33133		3134.17	1.21293
3132.86	26.5866		3132.86	21.3567		3132.86	16.245		3132.86	11.342		3132.86	6.25912		3132.86	1.22294
3131.54	26.5069		3131.54	21.3369		3131.54	16.2604		3131.54	11.4256		3131.54	6.28885		3131.54	1.29443
3130.23	26.4346		3130.23	21.3269		3130.23	16.2633		3130.23	11.3814		3130.23	6.3875		3130.23	1.19857
3128.92	26.3766		3128.92	21.2193		3128.92	16.3285		3128.92	11.465		3128.92	6.30633		3128.92	1.24272
3127.6	26.3331		3127.6	21.2776		3127.6	16.3439		3127.6	11.4248		3127.6	6.28212		3127.6	1.25955
3126.29	26.6715		3126.29	21.37		3126.29	16.3187		3126.29	11.3727		3126.29	6.3238		3126.29	1.29343
3124.98	26.5199		3124.98	21.2674		3124.98	16.2717		3124.98	11.3923		3124.98	6.34451		3124.98	1.28977
3123.66	26.426		3123.66	21.311		3123.66	16.2309		3123.66	11.428		3123.66	6.33826		3123.66	1.30999
3122.35	26.4041		3122.35	21.2961		3122.35	16.3086		3122.35	11.4636		3122.35	6.24521		3122.35	1.14261
3121.03	26.5478		3121.03	21.2471		3121.03	16.2896		3121.03	11.3198		3121.03	6.38264		3121.03	1.23787
3119.72	26.4252		3119.72	21.3248		3119.72	16.2707		3119.72	11.4032		3119.72	6.26268		3119.72	1.21036
3118.4	26.3745		3118.4	21.271		3118.4	16.3265		3118.4	11.3472		3118.4	6.2774		3118.4	1.2374
3117.09	26.4318		3117.09	21.2123		3117.09	16.3169		3117.09	11.4784		3117.09	6.40277		3117.09	1.20308
3115.77	26.3452		3115.77	21.251		3115.77	16.2949		3115.77	11.3028		3115.77	6.33671		3115.77	1.22329
3114.45	26.3162		3114.45	21.28		3114.45	16.2915		3114.45	11.4181		3114.45	6.19294		3114.45	1.22646
3113.14	26.4741		3113.14	21.2457		3113.14	16.2321		3113.14	11.3899		3113.14	6.26745		3113.14	1.24326
3111.82	26.4882		3111.82	21.2552		3111.82	16.1759		3111.82	11.2941		3111.82	6.28215		3111.82	1.20556
3110.5	26.452		3110.5	21.2501		3110.5	16.2783		3110.5	11.3456		3110.5	6.4074		3110.5	1.23937
3109.19	26.4302		3109.19	21.2693		3109.19	16.247		3109.19	11.2817		3109.19	6.31451		3109.19	1.22552
3107.87	26.4658		3107.87	21.2156		3107.87	16.3586		3107.87	11.4247		3107.87	6.40088		3107.87	1.27633
3106.55	26.4224		3106.55	21.3126		3106.55	16.2651		3106.55	11.3846		3106.55	6.31401		3106.55	1.23185
3105.23	26.4509		3105.23	21.2783		3105.23	16.3612		3105.23	11.3963		3105.23	6.3884		3105.23	1.19079
3103.92	26.5799		3103.92	21.3218		3103.92	16.2708		3103.92	11.4119		3103.92	6.36126		3103.92	1.23138
3102.6	26.3498		3102.6	21.3215		3102.6	16.283		3102.6	11.3162		3102.6	6.31026		3102.6	1.19713
3101.28	26.5362		3101.28	21.2678		3101.28	16.2579		3101.28	11.3358		3101.28	6.32493		3101.28	1.2717
3099.96	26.5359		3099.96	21.2433		3099.96	16.3074		3099.96	11.3872		3099.96	6.34556		3099.96	1.16607
3098.64	26.471		3098.64	21.3742		3098.64	16.3102		3098.64	11.3711		3098.64	6.36916		3098.64	1.22363
3097.32	26.4635		3097.32	21.3156		3097.32	16.341		3097.32	11.3748		3097.32	6.24364		3097.32	1.17921
3096	26.578		3096	21.2668		3096	16.2197		3096	11.3666		3096	6.37162		3096	1.21296
3094.68	26.6064		3094.68	21.2472		3094.68	16.3498		3094.68	11.3941		3094.68	6.27893		3094.68	1.22292
3093.36	26.4125		3093.36	21.2615		3093.36	16.2596		3093.36	11.2906		3093.36	6.35022		3093.36	1.17853
3092.04	26.4767		3092.04	21.2807		3092.04	16.2159		3092.04	11.3777		3092.04	6.34996		3092.04	1.21905
3090.72	26.3403		3090.72	21.2901		3090.72	16.2622		3090.72	11.298		3090.72	6.38248		3090.72	1.25956
3089.4	26.6123		3089.4	21.2802		3089.4	16.2402		3089.4	11.274		3089.4	6.3405		3089.4	1.17106
3088.08	26.4902		3088.08	21.183		3088.08	16.2617		3088.08	11.4404		3088.08	6.34025		3088.08	1.26246
3086.76	26.4255		3086.76	21.3912		3086.76	16.2708		3086.76	11.3806		3086.76	6.3251		3086.76	1.26222
3085.44	26.4109		3085.44	21.2455		3085.44	16.3108		3085.44	11.3446		3085.44	6.33377		3085.44	1.21448
3084.11	26.5037		3084.11	21.3131		3084.11	16.2145		3084.11	11.3603		3084.11	6.41389		3084.11	1.21764
3082.79	26.5678		3082.79	21.3128		3082.79	16.2205		3082.79	11.3877		3082.79	6.30648		3082.79	1.14958
3081.47	26.5389		3081.47	21.2012		3081.47	16.3565		3081.47	11.3954		3081.47	6.28242		3081.47	1.22395
3080.15	26.4885		3080.15	21.3898		3080.15	16.1983		3080.15	11.3832		3080.15	6.39522		3080.15	1.24405
3078.82	26.4381		3078.82	21.2443		3078.82	16.2507		3078.82	11.3196		3078.82	6.29977		3078.82	1.29465
3077.5	26.5237		3077.5	21.1763		3077.5	16.3093		3077.5	11.3669		3077.5	6.40955		3077.5	1.22663
3076.18	26.459		3076.18	21.3164		3076.18	16.2626		3076.18	11.4181		3076.18	6.24278		3076.18	1.21623
3074.85	26.5088		3074.85	21.2339		3074.85	16.2717		3074.85	11.402		3074.85	6.37036		3074.85	1.17535
3073.53	26.4299		3073.53	21.1998		3073.53	16.2621		3073.53	11.3225		3073.53	6.42062		3073.53	1.19883
3072.21	26.5368		3072.21	21.2431		3072.21	16.3114		3072.21	11.3381		3072.21	6.32823		3072.21	1.29679
3070.88	26.5079		3070.88	21.267		3070.88	16.3173		3070.88	11.5199		3070.88	6.38145		3070.88	1.28638
3069.56	26.5576		3069.56	21.2668		3069.56	16.2923		3069.56	11.3099		3069.56	6.41088		3069.56	1.26244
3068.23	26.4145		3068.23	21.2327		3068.23	16.221		3068.23	11.3413		3068.23	6.32152		3068.23	1.28588
3066.91	26.4928		3066.91	21.1503		3066.91	16.2362		3066.91	11.5032		3066.91	6.30048		3066.91	1.24504
3065.58	26.5425		3065.58	21.3434		3065.58	16.2638		3065.58	11.5266		3065.58	6.33585		3065.58	1.18729
3064.25	26.4779		3064.25	21.2706		3064.25	16.2048		3064.25	11.3721		3064.25	6.30592		3064.25	1.26147
3062.93	26.3706		3062.93	21.1979		3062.93	16.2911		3062.93	11.4707		3062.93	6.29083		3062.93	1.22741
3061.6	26.5844		3061.6	21.246		3061.6	16.3093		3061.6	11.3637		3061.6	6.29354		3061.6	1.30493
3060.28	26.42		3060.28	21.3375		3060.28	16.3245		3060.28	11.4267		3060.28	6.32592		3060.28	1.26411
3058.95	26.4411		3058.95	21.3228		3058.95	16.2348		3058.95	11.379		3058.95	6.35829		3058.95	1.15911
3057.62	26.4765		3057.62	21.2356		3057.62	16.3209		3057.62	11.4735		3057.62	6.30169		3057.62	1.27376
3056.29	26.5047		3056.29	21.192		3056.29	16.3022		3056.29	11.3666		3056.29	6.33108		3056.29	1.19582
3054.97	26.5543		3054.97	21.351		3054.97	16.2649		3054.97	11.3387		3054.97	6.31304		3054.97	1.31717
3053.64	26.5184		3053.64	21.2783		3053.64	16.1968		3053.64	11.5358		3053.64	6.26537		3053.64	1.1886
3052.31	26.3898		3052.31	21.3601		3052.31	16.2891		3052.31	11.3934		3052.31	6.33624		3052.31	1.17825
3050.98	26.3753		3050.98	21.2152		3050.98	16.3536		3050.98	11.3695		3050.98	6.32709		3050.98	1.1949
3049.65	26.4819		3049.65	21.1763		3049.65	16.1499		3049.65	11.3771		3049.65	6.43938		3049.65	1.35328
3048.33	26.4887		3048.33	21.34		3048.33	16.3037		3048.33	11.44		3048.33	6.39172		3048.33	1.25517
3047	26.4742		3047	21.3831		3047	16.2912		3047	11.4555		3047	6.38257		3047	1.27179
3045.67	26.4953		3045.67	21.2624		3045.67	16.3186		3045.67	11.3408		3045.67	6.31126		3045.67	1.24119
3044.34	26.3953		3044.34	21.3874		3044.34	16.2783		3044.34	11.3879		3044.34	6.33765		3044.34	1.19374
3043.01	26.3168		3043.01	21.3293		3043.01	16.2504		3043.01	11.4625		3043.01	6.34626		3043.01	1.2542
3041.68	26.5869		3041.68	21.2905		3041.68	16.3302		3041.68	11.4346		3041.68	6.34009		3041.68	1.24721
3040.35	26.487		3040.35	21.3288		3040.35	16.2684		3040.35	11.3831		3040.35	6.36349		3040.35	1.25708
3039.02	26.5792		3039.02	21.2901		3039.02	16.3266		3039.02	11.3907		3039.02	6.37505		3039.02	1.3276
3037.69	26.5007		3037.69	21.4919		3037.69	16.3294		3037.69	11.4456		3037.69	6.36592		3037.69	1.22628
3036.35	26.5075		3036.35	21.3232		3036.35	16.2768		3036.35	11.3626		3036.35	6.35974		3036.35	1.27993
3035.02	26.5285		3035.02	21.3182		3035.02	16.2305		3035.02	11.4687		3035.02	6.31219		3035.02	1.32683
3033.69	26.5709		3033.69	21.2265		3033.69	16.2825		3033.69	11.3779		3033.69	6.38285		3033.69	1.19189
3032.36	26.3929		3032.36	21.3946		3032.36	16.2423		3032.36	11.3933		3032.36	6.36191		3032.36	1.26236
3031.03	26.5987		3031.03	21.3751		3031.03	16.3343		3031.03	11.3734		3031.03	6.38232		3031.03	1.32606
3029.69	26.577		3029.69	21.2931		3029.69	16.3125		3029.69	11.3928		3029.69	6.34661		3029.69	1.20803
3028.36	26.5909		3028.36	21.389		3028.36	16.1924		3028.36	11.2981		3028.36	6.40245		3028.36	1.25489
3027.03	26.5907		3027.03	21.3599		3027.03	16.2721		3027.03	11.4316		3027.03	6.35495		3027.03	1.22774
3025.7	26.4767		3025.7	21.3164		3025.7	16.3425		3025.7	11.4942		3025.7	6.36649		3025.7	1.21405
3024.36	26.4836		3024.36	21.3017		3024.36	16.2777		3024.36	11.4664		3024.36	6.31016		3024.36	1.2239
3023.03	26.5755		3023.03	21.2342		3023.03	16.3389		3023.03	11.5054		3023.03	6.2804		3023.03	1.28418
3021.69	26.632		3021.69	21.3252		3021.69	16.354		3021.69	11.4226		3021.69	6.42764		3021.69	1.33771
3020.36	26.5607		3020.36	21.4066		3020.36	16.3353		3020.36	11.5166		3020.36	6.42441		3020.36	1.30048
3019.03	26.5108		3019.03	21.2815		3019.03	16.3105		3019.03	11.3474		3019.03	6.34453		3019.03	1.33719
3017.69	26.6027		3017.69	21.2813		3017.69	16.3133		3017.69	11.5043		3017.69	6.42976		3017.69	1.25295
3016.36	26.5031		3016.36	21.281		3016.36	16.2885		3016.36	11.3979		3016.36	6.37348		3016.36	1.29301
3015.02	26.4745		3015.02	21.2712		3015.02	16.322		3015.02	11.382		3015.02	6.35259		3015.02	1.2894
3013.68	26.8073		3013.68	21.3429		3013.68	16.3033		3013.68	11.4916		3013.68	6.43482		3013.68	1.36637
3012.35	26.6298		3012.35	21.381		3012.35	16.3123		3012.35	11.4403		3012.35	6.39036		3012.35	1.2889
3011.01	26.4878		3011.01	21.3567		3011.01	16.3856		3011.01	11.5185		3011.01	6.33708		3011.01	1.26852
3009.68	26.4733		3009.68	21.3517		3009.68	16.275		3009.68	11.4554		3009.68	6.4546		3009.68	1.27163
3008.34	26.5509		3008.34	21.4616		3008.34	16.2901		3008.34	11.4512		3008.34	6.40721		3008.34	1.34854
3007	26.6427		3007	21.3799		3007	16.2959		3007	11.5451		3007	6.35396		3007	1.2812
3005.67	26.5362		3005.67	21.4036		3005.67	16.3202		3005.67	11.4899		3005.67	6.4361		3005.67	1.234
3004.33	26.5925		3004.33	21.3171		3004.33	16.3812		3004.33	11.517		3004.33	6.42699		3004.33	1.26729
3002.99	26.6559		3002.99	21.269		3002.99	16.3442		3002.99	11.4423		3002.99	6.35611		3002.99	1.3676
3001.65	26.5777		3001.65	21.2831		3001.65	16.3439		3001.65	11.5047		3001.65	6.36467		3001.65	1.46117
3000.32	26.4713		3000.32	21.3834		3000.32	16.2702		3000.32	11.43		3000.32	6.39676		3000.32	1.35702
2998.98	26.662		2998.98	21.407		2998.98	16.2302		2998.98	11.6295		2998.98	6.38472		2998.98	1.39361
2997.64	26.598		2997.64	21.3685		2997.64	16.4288		2997.64	11.4686		2997.64	6.44618		2997.64	1.41678
2996.3	26.7532		2996.3	21.4112		2996.3	16.2909		2996.3	11.4957		2996.3	6.41945		2996.3	1.39307
2994.96	26.7317		2994.96	21.3536		2994.96	16.361		2994.96	11.605		2994.96	6.44562		2994.96	1.40954
2993.62	26.6536		2993.62	21.4537		2993.62	16.4249		2993.62	11.5029		2993.62	6.45416		2993.62	1.38583
2992.28	26.6816		2992.28	21.4582		2992.28	16.3574		2992.28	11.6083		2992.28	6.48031		2992.28	1.4023
2990.94	26.6671		2990.94	21.4149		2990.94	16.4519		2990.94	11.4632		2990.94	6.49177		2990.94	1.51579
2989.6	26.695		2989.6	21.3812		2989.6	16.4363		2989.6	11.5568		2989.6	6.45918		2989.6	1.47535
2988.26	26.8995		2988.26	21.4096		2988.26	16.3352		2988.26	11.5135		2988.26	6.5499		2988.26	1.5152
2986.92	26.5249		2986.92	21.438		2986.92	16.3746		2986.92	11.5328		2986.92	6.56133		2986.92	1.45137
2985.58	26.5882		2985.58	21.4425		2985.58	16.3652		2985.58	11.6146		2985.58	6.47007		2985.58	1.51462
2984.24	26.6796		2984.24	21.6046		2984.24	16.3924		2984.24	11.7002		2984.24	6.47272		2984.24	1.59121
2982.9	26.8204		2982.9	21.4467		2982.9	16.4532		2982.9	11.61		2982.9	6.66602		2982.9	1.43047
2981.55	26.7283		2981.55	21.4321		2981.55	16.3705		2981.55	11.6957		2981.55	6.48681		2981.55	1.61064
2980.21	26.9325		2980.21	21.47		2980.21	16.4496		2980.21	11.6367		2980.21	6.57155		2980.21	1.60365
2978.87	26.7488		2978.87	21.465		2978.87	16.4737		2978.87	11.7224		2978.87	6.53607		2978.87	1.55323
2977.53	26.826		2977.53	21.5887		2977.53	16.5162		2977.53	11.7103		2977.53	6.56508		2977.53	1.6097
2976.18	26.8891		2976.18	21.6647		2976.18	16.5403		2976.18	11.6436		2976.18	6.55598		2976.18	1.56598
2974.84	26.7196		2974.84	21.4546		2974.84	16.5186		2974.84	11.7057		2974.84	6.62892		2974.84	1.61575
2973.5	26.832		2973.5	21.5306		2973.5	16.4878		2973.5	11.7054		2973.5	6.56709		2973.5	1.57539
2972.15	26.9937		2972.15	21.5207		2972.15	16.4418		2972.15	11.7363		2972.15	6.67515		2972.15	1.66185
2970.81	26.789		2970.81	21.5538		2970.81	16.5299		2970.81	11.7984		2970.81	6.59284		2970.81	1.72158
2969.47	26.8803		2969.47	21.5535		2969.47	16.5449		2969.47	11.7824		2969.47	6.69792		2969.47	1.74126
2968.12	26.8658		2968.12	21.6294		2968.12	16.5598		2968.12	11.786		2968.12	6.64198		2968.12	1.81096
2966.78	27.0766		2966.78	21.6767		2966.78	16.5504		2966.78	11.6921		2966.78	6.63288		2966.78	1.77059
2965.43	26.8299		2965.43	21.6383		2965.43	16.5957		2965.43	11.8827		2965.43	6.66474		2965.43	1.61023
2964.09	26.914		2964.09	21.6047		2964.09	16.6441		2964.09	11.9603		2964.09	6.70537		2964.09	1.78657
2962.74	26.9066		2962.74	21.7186		2962.74	16.6712		2962.74	11.7028		2962.74	6.76938		2962.74	1.80955
2961.4	26.8429		2961.4	21.7183		2961.4	16.5065		2961.4	11.8349		2961.4	6.68717		2961.4	1.71924
2960.05	26.941		2960.05	21.637		2960.05	16.5245		2960.05	11.9163		2960.05	6.76285		2960.05	1.8788
2958.7	27.0742		2958.7	21.6891		2958.7	16.652		2958.7	11.9043		2958.7	6.73328		2958.7	1.76187
2957.36	27.0527		2957.36	21.7649		2957.36	16.6882		2957.36	11.9117		2957.36	6.65696		2957.36	1.81147
2956.01	27.0101		2956.01	21.7645		2956.01	16.6057		2956.01	12.0164		2956.01	6.80273		2956.01	1.81112
2954.66	26.9465		2954.66	21.7023		2954.66	16.5629		2954.66	11.9148		2954.66	6.76732		2954.66	1.82076
2953.32	26.9742		2953.32	21.645		2953.32	16.6416		2953.32	11.9184		2953.32	6.83707		2953.32	1.95685
2951.97	27.0511		2951.97	21.7397		2951.97	16.6686		2951.97	11.9569		2951.97	6.81044		2951.97	1.90323
2950.62	27.0507		2950.62	21.8344		2950.62	16.641		2950.62	12.0887		2950.62	6.76629		2950.62	1.833
2949.27	27.1486		2949.27	21.8008		2949.27	16.6862		2949.27	11.9444		2949.27	6.80389		2949.27	1.95571
2947.92	27.0359		2947.92	21.7482		2947.92	16.6434		2947.92	11.9752		2947.92	6.82105		2947.92	1.85889
2946.58	27.4285		2946.58	21.7716		2946.58	16.5398		2946.58	12.0448		2946.58	6.91115		2946.58	1.95162
2945.23	27.1895		2945.23	21.89		2945.23	16.6002		2945.23	11.8734		2945.23	6.83493		2945.23	1.918
2943.88	27.2171		2943.88	21.7329		2943.88	16.7244		2943.88	11.939		2943.88	6.74999		2943.88	1.86778
2942.53	27.0483		2942.53	21.7848		2942.53	16.6239		2942.53	11.9892		2942.53	6.85755		2942.53	1.81757
2941.18	27.076		2941.18	21.8557		2941.18	16.6235		2941.18	12.0937		2941.18	6.7289		2941.18	1.89363
2939.83	27.1457		2939.83	21.8316		2939.83	16.5565		2939.83	12.0777		2939.83	6.84516		2939.83	1.85008
2938.48	27.2294		2938.48	21.7363		2938.48	16.6472		2938.48	11.8832		2938.48	6.82732		2938.48	1.94603
2937.13	27.1589		2937.13	21.8166		2937.13	16.6135		2937.13	11.9799		2937.13	6.82114		2937.13	1.85932
2935.78	27.2426		2935.78	21.8163		2935.78	16.6556		2935.78	11.9872		2935.78	6.90527		2935.78	1.84568
2934.43	27.172		2934.43	21.8728		2934.43	16.6644		2934.43	11.8898		2934.43	6.83208		2934.43	2.00795
2933.08	27.0596		2933.08	21.863		2933.08	16.6641		2933.08	11.9166		2933.08	6.82007		2933.08	1.84496
2931.72	27.1082		2931.72	21.7726		2931.72	16.5759		2931.72	12.0365		2931.72	6.83136		2931.72	1.8811
2930.37	27.0727		2930.37	21.7248		2930.37	16.6968		2930.37	11.9392		2930.37	6.78152		2930.37	1.90727
2929.02	27.1424		2929.02	21.824		2929.02	16.7025		2929.02	11.9776		2929.02	6.83938		2929.02	1.78088
2927.67	27.1349		2927.67	21.8047		2927.67	16.5931		2927.67	11.9927		2927.67	6.87103		2927.67	1.81037
2926.32	27.1205		2926.32	21.8801		2926.32	16.6443		2926.32	11.8915		2926.32	6.84449		2926.32	1.90616
2924.96	27.2811		2924.96	21.7661		2924.96	16.7378		2924.96	11.9919		2924.96	6.87612		2924.96	1.80304
2923.61	27.0987		2923.61	21.69		2923.61	16.6527		2923.61	11.9528		2923.61	6.87867		2923.61	1.74635
2922.26	27.1123		2922.26	21.6708		2922.26	16.6222		2922.26	11.9137		2922.26	6.84341		2922.26	1.66981
2920.9	27.2028		2920.9	21.7462		2920.9	16.7187		2920.9	11.9404		2920.9	6.84014		2920.9	1.66286
2919.55	27.0905		2919.55	21.7221		2919.55	16.5882		2919.55	11.8935		2919.55	6.91245		2919.55	1.78839
2918.2	27.181		2918.2	21.788		2918.2	16.5728		2918.2	11.9125		2918.2	6.76097		2918.2	1.8642
2916.84	27.1875		2916.84	21.7026		2916.84	16.6269		2916.84	11.858		2916.84	6.84197		2916.84	1.78438
2915.49	27.0264		2915.49	21.6833		2915.49	16.6055		2915.49	11.904		2915.49	6.78062		2915.49	1.69797
2914.13	27.2076		2914.13	21.8154		2914.13	16.5326		2914.13	11.9269		2914.13	6.8035		2914.13	1.7539
2912.78	27.0047		2912.78	21.6685		2912.78	16.6713		2912.78	11.8762		2912.78	6.83219		2912.78	1.63776
2911.42	27.0671		2911.42	21.6162		2911.42	16.5592		2911.42	11.8952		2911.42	6.77377		2911.42	1.69367
2910.06	26.934		2910.06	21.5875		2910.06	16.5921		2910.06	11.9258		2910.06	6.77923		2910.06	1.65035
2908.71	27.1082		2908.71	21.6297		2908.71	16.5586		2908.71	11.9447		2908.71	6.71504		2908.71	1.59381
2907.35	26.9961		2907.35	21.7239		2907.35	16.5583		2907.35	11.8864		2907.35	6.77273		2907.35	1.73897
2906	26.9678		2906	21.6338		2906	16.6335		2906	11.8667		2906	6.74628		2906	1.7188
2904.64	26.9814		2904.64	21.6335		2904.64	16.5848		2904.64	11.9011		2904.64	6.70534		2904.64	1.64576
2903.28	27.0159		2903.28	21.7229		2903.28	16.503		2903.28	11.7732		2903.28	6.6992		2903.28	1.59588
2901.92	26.9388		2901.92	21.7461		2901.92	16.6174		2901.92	11.881		2901.92	6.72207		2901.92	1.64512
2900.57	26.8617		2900.57	21.6844		2900.57	16.59		2900.57	11.9927		2900.57	6.7797		2900.57	1.54241
2899.21	27.0844		2899.21	21.6369		2899.21	16.4479		2899.21	11.7143		2899.21	6.7127		2899.21	1.56853
2897.85	26.7843		2897.85	21.5564		2897.85	16.6135		2897.85	11.8182		2897.85	6.70368		2897.85	1.5286
2896.49	27.0627		2896.49	21.6882		2896.49	16.6523		2896.49	11.7484		2896.49	6.73811		2896.49	1.60753
2895.13	26.9926		2895.13	21.6501		2895.13	16.438		2895.13	11.8329		2895.13	6.69722		2895.13	1.66662
2893.78	26.9922		2893.78	21.7205		2893.78	16.5643		2893.78	11.8094		2893.78	6.77797		2893.78	1.6399
2892.42	26.9361		2892.42	21.6777		2892.42	16.5278		2892.42	11.7705		2892.42	6.78341		2892.42	1.69236
2891.06	26.887		2891.06	21.6491		2891.06	16.4944		2891.06	11.8241		2891.06	6.71359		2891.06	1.5535
2889.7	27.1442		2889.7	21.6253		2889.7	16.5604		2889.7	11.7968		2889.7	6.75088		2889.7	1.64223
2888.34	26.9698		2888.34	21.7427		2888.34	16.545		2888.34	11.6885		2888.34	6.62901		2888.34	1.61224
2886.98	26.9068		2886.98	21.7471		2886.98	16.5778		2886.98	11.8886		2886.98	6.70681		2886.98	1.61522
2885.62	26.9412		2885.62	21.6055		2885.62	16.6257		2885.62	11.7456		2885.62	6.74407		2885.62	1.51274
2884.26	26.8852		2884.26	21.657		2884.26	16.4719		2884.26	11.8185		2884.26	6.63674		2884.26	1.55199
2882.9	26.8083		2882.9	21.5907		2882.9	16.5197		2882.9	11.7604		2882.9	6.74628		2882.9	1.51215
2881.53	27.0861		2881.53	21.6234		2881.53	16.6307		2881.53	11.6676		2881.53	6.64188		2881.53	1.51185
2880.17	26.884		2880.17	21.6701		2880.17	16.5612		2880.17	11.6788		2880.17	6.7456		2880.17	1.64987
2878.81	27.0992		2878.81	21.6604		2878.81	16.579		2878.81	11.7516		2878.81	6.61812		2878.81	1.47175
2877.45	27.0571		2877.45	21.5707		2877.45	16.4494		2877.45	11.8783		2877.45	6.73625		2877.45	1.59985
2876.09	26.9872		2876.09	21.6268		2876.09	16.5303		2876.09	11.8163		2876.09	6.68392		2876.09	1.58966
2874.72	26.952		2874.72	21.6876		2874.72	16.536		2874.72	11.8237		2874.72	6.66916		2874.72	1.63542
2873.36	27.1184		2873.36	21.6074		2873.36	16.5988		2873.36	11.7426		2873.36	6.65151		2873.36	1.52982
2872	26.9582		2872	21.6493		2872	16.6466		2872	11.6691		2872	6.67717		2872	1.5065
2870.63	27.0065		2870.63	21.7383		2870.63	16.6312		2870.63	11.7073		2870.63	6.78651		2870.63	1.54238
2869.27	27.1032		2869.27	21.6205		2869.27	16.6279		2869.27	11.8107		2869.27	6.57263		2869.27	1.50591
2867.91	27.0057		2867.91	21.6202		2867.91	16.5585		2867.91	11.745		2867.91	6.65599		2867.91	1.65355
2866.54	27.1371		2866.54	21.7091		2866.54	16.6182		2866.54	11.7754		2866.54	6.79123		2866.54	1.52176
2865.18	26.7621		2865.18	21.7276		2865.18	16.6359		2865.18	11.7328		2865.18	6.6986		2865.18	1.54775
2863.81	26.949		2863.81	21.7413		2863.81	16.5126		2863.81	11.7978		2863.81	6.61754		2863.81	1.60002
2862.45	26.8931		2862.45	21.7081		2862.45	16.5423		2862.45	11.8512		2862.45	6.73829		2862.45	1.60956
2861.08	27.0869		2861.08	21.6937		2861.08	16.596		2861.08	11.9622		2861.08	6.7149		2861.08	1.56983
2859.72	27.038		2859.72	21.7074		2859.72	16.5387		2859.72	11.8735		2859.72	6.68287		2859.72	1.54326
2858.35	26.9613		2858.35	21.7024		2858.35	16.5684		2858.35	11.854		2858.35	6.71711		2858.35	1.61518
2856.99	27.0718		2856.99	21.7537		2856.99	16.616		2856.99	11.7193		2856.99	6.71101		2856.99	1.67723
2855.62	27.0091		2855.62	21.7299		2855.62	16.6037		2855.62	11.7612		2855.62	6.62716		2855.62	1.65721
2854.25	27.1264		2854.25	21.7389		2854.25	16.5645		2854.25	11.78		2854.25	6.72762		2854.25	1.64048
2852.89	27.036		2852.89	21.7011		2852.89	16.6481		2852.89	11.8525		2852.89	6.73304		2852.89	1.57783
2851.52	27.0633		2851.52	21.7289		2851.52	16.6867		2851.52	11.8598		2851.52	6.72695		2851.52	1.59393
2850.15	27.0352		2850.15	21.766		2850.15	16.5845		2850.15	11.8901		2850.15	6.75538		2850.15	1.59033
2848.78	26.9379		2848.78	21.6954		2848.78	16.5752		2848.78	11.8783		2848.78	6.88163		2848.78	1.65231
2847.42	27.1313		2847.42	21.77		2847.42	16.5569		2847.42	11.8856		2847.42	6.78346		2847.42	1.53071
2846.05	27.1793		2846.05	21.7696		2846.05	16.6075		2846.05	11.8545		2846.05	6.73998		2846.05	1.70082
2844.68	27.0958		2844.68	21.7787		2844.68	16.697		2844.68	12.0381		2844.68	6.74539		2844.68	1.59564
2843.31	27.2061		2843.31	21.8438		2843.31	16.7595		2843.31	11.873		2843.31	6.78817		2843.31	1.66413
2841.94	26.9844		2841.94	21.6984		2841.94	16.6455		2841.94	11.999		2841.94	6.75908		2841.94	1.70638
2840.57	27.1638		2840.57	21.7823		2840.57	16.5883		2840.57	11.968		2840.57	6.81046		2840.57	1.73551
2839.2	27.0597		2839.2	21.7258		2839.2	16.6987		2839.2	11.9676		2839.2	6.85608		2839.2	1.6697
2837.83	27.1007		2837.83	21.7816		2837.83	16.6565		2837.83	11.8638		2837.83	6.86146		2837.83	1.68246
2836.46	27.1832		2836.46	21.7719		2836.46	16.7279		2836.46	11.8635		2836.46	6.93864		2836.46	1.68868
2835.09	27.2449		2835.09	21.6968		2835.09	16.6857		2835.09	11.9817		2835.09	6.92103		2835.09	1.81923
2833.72	27.1202		2833.72	21.832		2833.72	16.6435		2833.72	12.0119		2833.72	6.74266		2833.72	1.62259
2832.35	27.1405		2832.35	21.9437		2832.35	16.7179		2832.35	11.8968		2832.35	6.85713		2832.35	1.66152
2830.98	27.2367		2830.98	21.8499		2830.98	16.6728		2830.98	11.9959		2830.98	6.88547		2830.98	1.67755
2829.61	27.1259		2829.61	21.915		2829.61	16.6814		2829.61	12.0452		2829.61	6.85928		2829.61	1.72626
2828.24	27.2842		2828.24	21.8866		2828.24	16.7408		2828.24	12.0104		2828.24	6.77859		2828.24	1.79457
2826.87	27.3527		2826.87	21.8675		2826.87	16.7315		2826.87	12.01		2826.87	6.85855		2826.87	1.62427
2825.49	27.3316		2825.49	21.9558		2825.49	16.767		2825.49	11.9332		2825.49	6.9098		2825.49	1.83635
2824.12	27.3587		2824.12	21.9695		2824.12	16.7786		2824.12	12.0015		2824.12	6.91803		2824.12	1.74125
2822.75	27.3996		2822.75	21.9178		2822.75	16.7185		2822.75	12.0393		2822.75	6.95778		2822.75	1.83563
2821.38	27.3302		2821.38	22.048		2821.38	16.7689		2821.38	12.0848		2821.38	6.86283		2821.38	1.72424
2820	27.2608		2820	21.9543		2820	16.7835		2820	12.0042		2820	6.88538		2820	1.76634
2818.63	27.5222		2818.63	21.898		2818.63	16.9113		2818.63	12		2818.63	7.01966		2818.63	1.75947
2817.25	27.4666		2817.25	21.9582		2817.25	16.9199		2817.25	12.0568		2817.25	6.88751		2817.25	1.7885
2815.88	27.5695		2815.88	21.9951		2815.88	16.845		2815.88	12.0908		2815.88	6.94728		2815.88	1.80773
2814.51	27.3968		2814.51	22.0879		2814.51	16.788		2814.51	12.0637		2814.51	7.00129		2814.51	1.84978
2813.13	27.4307		2813.13	22.0223		2813.13	16.7966		2813.13	11.9717		2813.13	6.97514		2813.13	1.76788
2811.76	27.6162		2811.76	22.1011		2811.76	16.8588		2811.76	12.1429		2811.76	7.00051		2811.76	1.78384
2810.38	27.4986		2810.38	22.1612		2810.38	16.8674		2810.38	12.0548		2810.38	7.07165		2810.38	1.80631
2809.01	27.5325		2809.01	21.9513		2809.01	16.9058		2809.01	12.2031		2809.01	6.93107		2809.01	1.91027
2807.63	27.6628		2807.63	22.03		2807.63	16.8994		2807.63	12.2141		2807.63	6.97931		2807.63	1.87079
2806.25	27.4352		2806.25	22.1739		2806.25	16.9169		2806.25	12.1488		2806.25	6.99894		2806.25	1.82154
2804.88	27.4967		2804.88	22.1456		2804.88	16.9046		2804.88	12.2284		2804.88	7.11006		2804.88	1.90915
2803.5	27.7094		2803.5	22.2103		2803.5	16.9816		2803.5	12.2546		2803.5	7.12394		2803.5	1.92181
2802.12	27.6332		2802.12	22.2378		2802.12	16.8652		2802.12	12.239		2802.12	7.04636		2802.12	1.95074
2800.75	27.6533		2800.75	22.228		2800.75	17.0106		2800.75	12.17		2800.75	7.10025		2800.75	1.91128
2799.37	27.7146		2799.37	22.3811		2799.37	16.9091		2799.37	12.2952		2799.37	7.08841		2799.37	2.00532
2797.99	27.6523		2797.99	22.2039		2797.99	17.0158		2797.99	12.2681		2797.99	7.23653		2797.99	2.07002
2796.62	27.8166		2796.62	22.2732		2796.62	17.1135		2796.62	12.3552		2796.62	7.23323		2796.62	2.01755
2795.24	27.9534		2795.24	22.31		2795.24	17.1338		2795.24	12.3889		2795.24	7.25849		2795.24	2.05945
2793.86	27.8636		2793.86	22.2259		2793.86	17.1096		2793.86	12.4417		2793.86	7.16956		2793.86	2.16639
2792.48	27.76		2792.48	22.2719		2792.48	17.1419		2792.48	12.331		2792.48	7.28615		2792.48	2.01636
2791.1	27.6565		2791.1	22.4015		2791.1	17.195		2791.1	12.5396		2791.1	7.35704		2791.1	2.12652
2789.72	27.8344		2789.72	22.3267		2789.72	17.15		2789.72	12.4669		2789.72	7.30808		2789.72	2.25289
2788.34	27.9025		2788.34	22.4934		2788.34	17.1882		2788.34	12.4968		2788.34	7.33615		2788.34	2.28495
2786.96	27.9843		2786.96	22.5858		2786.96	17.1996		2786.96	12.4659		2786.96	7.36706		2786.96	2.22601
2785.58	27.9974		2785.58	22.4739		2785.58	17.2348		2785.58	12.6098		2785.58	7.44073		2785.58	2.22232
2784.2	28.1957		2784.2	22.6544		2784.2	17.2106		2784.2	12.5523		2784.2	7.53433		2784.2	2.30959
2782.82	28.1265		2782.82	22.6399		2782.82	17.4119		2782.82	12.624		2782.82	7.48538		2782.82	2.27017
2781.44	28.2493		2781.44	22.6951		2781.44	17.3403		2781.44	12.669		2781.44	7.48774		2781.44	2.30544
2780.06	28.2829		2780.06	22.8012		2780.06	17.3428		2780.06	12.7558		2780.06	7.56703		2780.06	2.29849
2778.68	28.296		2778.68	22.6755		2778.68	17.3482		2778.68	12.8198		2778.68	7.64343		2778.68	2.47332
2777.3	28.4392		2777.3	22.8094		2777.3	17.3774		2777.3	12.8799		2777.3	7.71127		2777.3	2.53774
2775.92	28.4248		2775.92	22.8737		2775.92	17.5311		2775.92	12.868		2775.92	7.73636		2775.92	2.7676
2774.53	28.6638		2774.53	22.9288		2774.53	17.5957		2774.53	12.9091		2774.53	7.76145		2774.53	2.53674
2773.15	28.3618		2773.15	23.058		2773.15	17.6634		2773.15	13.0299		2773.15	7.73244		2773.15	2.72111
2771.77	28.5186		2771.77	23.0203		2771.77	17.6717		2771.77	13.0748		2771.77	7.72052		2771.77	2.74003
2770.38	28.6617		2770.38	23.1633		2770.38	17.7097		2770.38	13.2183		2770.38	7.97037		2770.38	2.85621
2769	28.8799		2769	23.4081		2769	17.7506		2769	13.2783		2769	7.97547		2769	3.08254
2767.62	29.0776		2767.62	23.2639		2767.62	17.833		2767.62	13.2322		2767.62	8.13984		2767.62	2.97175
2766.23	28.9878		2766.23	23.4623		2766.23	17.8768		2766.23	13.402		2766.23	8.16482		2766.23	3.20446
2764.85	29.2127		2764.85	23.3413		2764.85	17.9118		2764.85	13.3028		2764.85	8.2836		2764.85	3.36256
2763.47	29.3282		2763.47	23.6136		2763.47	18.1656		2763.47	13.5181		2763.47	8.3796		2763.47	3.54004
2762.08	29.5392		2762.08	23.7841		2762.08	18.2538		2762.08	13.7635		2762.08	8.48977		2762.08	3.70773
2760.7	29.6272		2760.7	23.8111		2760.7	18.3714		2760.7	13.9293		2760.7	8.53454		2760.7	3.90773
2759.31	29.8928		2759.31	23.9074		2759.31	18.3796		2759.31	14.1253		2759.31	8.74974		2759.31	4.05909
2757.93	30.0148		2757.93	24.2349		2757.93	18.5889		2757.93	14.1775		2757.93	8.84273		2757.93	4.26542
2756.54	30.3554		2756.54	24.4652		2756.54	18.7182		2756.54	14.468		2756.54	9.08618		2756.54	4.50078
2755.15	30.6821		2755.15	24.4782		2755.15	19.075		2755.15	14.7848		2755.15	9.27559		2755.15	4.93663
2753.77	30.8449		2753.77	24.7776		2753.77	19.1244		2753.77	15.007		2753.77	9.36559		2753.77	5.22675
2752.38	31.2465		2752.38	25.1509		2752.38	19.4279		2752.38	15.1951		2752.38	9.62014		2752.38	5.61701
2750.99	31.45		2750.99	25.0898		2750.99	19.7696		2750.99	15.5796		2750.99	9.81785		2750.99	5.98771
2749.61	31.8923		2749.61	25.7076		2749.61	20.0196		2749.61	16.0548		2749.61	10.2481		2749.61	6.57484
2748.22	32.4505		2748.22	26.0343		2748.22	20.3641		2748.22	16.4012		2748.22	10.5902		2748.22	6.80624
2746.83	33.0834		2746.83	26.3747		2746.83	20.5135		2746.83	16.7211		2746.83	10.8897		2746.83	7.4156
2745.44	33.1295		2745.44	26.9134		2745.44	21.0289		2745.44	17.1919		2745.44	11.1749		2745.44	7.63059
2744.06	34.028		2744.06	27.3089		2744.06	21.4437		2744.06	17.5531		2744.06	11.5422		2744.06	7.99731
2742.67	34.7966		2742.67	28.0086		2742.67	21.8171		2742.67	17.9745		2742.67	11.9093		2742.67	8.52211
2741.28	35.2854		2741.28	28.33		2741.28	22.1136		2741.28	18.6864		2741.28	12.3982		2741.28	9.38572
2739.89	36.1557		2739.89	29.2829		2739.89	22.5132		2739.89	18.9602		2739.89	12.765		2739.89	9.72927
2738.5	36.6509		2738.5	29.4885		2738.5	23.1869		2738.5	19.6377		2738.5	13.0637		2738.5	9.95328
2737.11	37.0641		2737.11	30.3394		2737.11	23.5006		2737.11	20.1338		2737.11	13.5718		2737.11	10.6612
2735.72	38.1515		2735.72	30.8306		2735.72	24.0884		2735.72	20.7919		2735.72	13.8958		2735.72	11.043
2734.33	38.5098		2734.33	31.1003		2734.33	24.5492		2734.33	21.2612		2734.33	14.378		2734.33	11.7053
2732.94	39.0313		2732.94	31.9135		2732.94	25.0746		2732.94	22.081		2732.94	14.9677		2732.94	11.9707
2731.55	40.5124		2731.55	32.6343		2731.55	25.3023		2731.55	22.4443		2731.55	15.3987		2731.55	12.6744
2730.16	40.9313		2730.16	33.1062		2730.16	25.8981		2730.16	22.913		2730.16	15.8832		2730.16	12.9653
2728.77	41.7379		2728.77	33.7022		2728.77	26.4994		2728.77	23.4569		2728.77	16.4185		2728.77	13.6782
2727.38	42.2516		2727.38	34.5879		2727.38	26.7356		2727.38	24.1437		2727.38	16.6227		2727.38	14.0332
2725.99	42.8331		2725.99	34.99		2725.99	27.2571		2725.99	24.7172		2725.99	17.3131		2725.99	14.2527
2724.59	43.7884		2724.59	35.415		2724.59	27.852		2724.59	24.8386		2724.59	17.5594		2724.59	14.5914
2723.2	45.0832		2723.2	36.2309		2723.2	28.2701		2723.2	25.3742		2723.2	18.2409		2723.2	14.7334
2721.81	45.1609		2721.81	36.5129		2721.81	28.9234		2721.81	25.8982		2721.81	18.552		2721.81	14.9977
2720.42	45.5918		2720.42	37.0339		2720.42	28.7413		2720.42	25.9591		2720.42	18.8148		2720.42	15.3521
2719.02	45.9819		2719.02	37.334		2719.02	29.1267		2719.02	26.1629		2719.02	18.8601		2719.02	15.2107
2717.63	46.6027		2717.63	37.657		2717.63	29.4443		2717.63	26.5172		2717.63	19.2895		2717.63	15.1144
2716.24	47.1554		2716.24	38.2694		2716.24	29.5649		2716.24	26.559		2716.24	19.3036		2716.24	15.1886
2714.84	47.1171		2714.84	38.5783		2714.84	29.6002		2714.84	26.8755		2714.84	19.7948		2714.84	14.8608
2713.45	47.812		2713.45	38.4414		2713.45	29.5738		2713.45	26.5036		2713.45	19.8568		2713.45	14.4816
2712.05	47.699		2712.05	38.7685		2712.05	29.7354		2712.05	26.335		2712.05	19.8228		2712.05	14.6684
2710.66	47.4705		2710.66	38.6637		2710.66	29.2275		2710.66	26.6851		2710.66	19.5096		2710.66	14.0483
2709.26	47.0726		2709.26	38.4764		2709.26	28.9017		2709.26	26.2384		2709.26	19.5772		2709.26	14.2866
2707.87	47.1089		2707.87	37.9035		2707.87	28.6935		2707.87	26.2539		2707.87	19.4362		2707.87	14.091
2706.47	46.5009		2706.47	37.9092		2706.47	28.6879		2706.47	25.8788		2706.47	19.2726		2706.47	13.9083
2705.08	46.4357		2705.08	37.1485		2705.08	28.3213		2705.08	25.7405		2705.08	19.7068		2705.08	13.7128
2703.68	46.3094		2703.68	37.0763		2703.68	28.5622		2703.68	25.6811		2703.68	19.2135		2703.68	13.5463
2702.28	45.8849		2702.28	37.3528		2702.28	27.8996		2702.28	25.4978		2702.28	19.2219		2702.28	13.4474
2700.89	45.4809		2700.89	36.6614		2700.89	27.7094		2700.89	25.1231		2700.89	19.2811		2700.89	13.6855
2699.49	45.3753		2699.49	36.5297		2699.49	27.6805		2699.49	25.3791		2699.49	19.3769		2699.49	13.4164
2698.09	45.0528		2698.09	35.7655		2698.09	27.3819		2698.09	25.256		2698.09	18.977		2698.09	13.0607
2696.7	44.7441		2696.7	36.0374		2696.7	27.4703		2696.7	24.8329		2696.7	19.039		2696.7	13.0678
2695.3	44.4152		2695.3	35.0994		2695.3	27.1602		2695.3	25.1337		2695.3	19.0447		2695.3	12.8535
2693.9	43.9035		2693.9	35.2064		2693.9	27.0787		2693.9	24.9095		2693.9	18.6		2693.9	12.6906
2692.5	43.9607		2692.5	35.3133		2692.5	26.9094		2692.5	24.6141		2692.5	18.7127		2692.5	12.6047
2691.1	43.8623		2691.1	34.5363		2691.1	26.8865		2691.1	24.6112		2691.1	18.7072		2691.1	12.7369
2689.7	44.1021		2689.7	34.5151		2689.7	26.6909		2689.7	24.4322		2689.7	18.6623		2689.7	12.1767
2688.3	43.4015		2688.3	34.2284		2688.3	26.674		2688.3	24.2495		2688.3	18.3981		2688.3	12.0942
2686.91	43.3032		2686.91	34.0929		2686.91	26.502		2686.91	24.3966		2686.91	18.5332		2686.91	11.8515
2685.51	42.9344		2685.51	33.7149		2685.51	26.2539		2685.51	23.9106		2685.51	18.21		2685.51	11.4295
2684.11	42.7416		2684.11	33.5978		2684.11	26.2195		2684.11	23.642		2684.11	17.7549		2684.11	11.3376
2682.71	42.3933		2682.71	33.714		2682.71	25.9804		2682.71	23.6206		2682.71	17.6934		2682.71	11.0952
2681.3	42.4913		2681.3	33.3134		2681.3	25.7004		2681.3	23.3708		2681.3	17.5504		2681.3	10.9649
2679.9	42.1229		2679.9	32.9313		2679.9	25.7246		2679.9	22.9453		2679.9	17.4637		2679.9	10.7227
2678.5	41.5453		2678.5	33.107		2678.5	25.5237		2678.5	23.0512		2678.5	17.1045		2678.5	10.5574
2677.1	42.0149		2677.1	32.8302		2677.1	25.1358		2677.1	22.3865		2677.1	16.8719		2677.1	9.81623
2675.7	41.0931		2675.7	32.6814		2675.7	24.9556		2675.7	22.1522		2675.7	16.6534		2675.7	9.91666
2674.3	40.6915		2674.3	32.1855		2674.3	24.5709		2674.3	21.9478		2674.3	16.5079		2674.3	9.3486
2672.9	40.1551		2672.9	31.7902		2672.9	24.5106		2672.9	21.5641		2672.9	16.2082		2672.9	9.19647
2671.49	39.8889		2671.49	31.4499		2671.49	24.2021		2671.49	21.0684		2671.49	15.8384		2671.49	8.91332
2670.09	39.4946		2670.09	31.5116		2670.09	23.8791		2670.09	21.0737		2670.09	15.6343		2670.09	8.47685
2668.69	38.898		2668.69	30.9432		2668.69	23.8131		2668.69	20.5484		2668.69	15.1414		2668.69	8.14282
2667.29	38.3152		2667.29	30.6672		2667.29	23.4261		2667.29	20.2101		2667.29	14.8843		2667.29	7.95909
2665.88	38.1709		2665.88	30.2863		2665.88	23.2756		2665.88	19.9914		2665.88	14.5487		2665.88	7.53584
2664.48	37.5952		2664.48	30.3254		2664.48	22.8276		2664.48	19.5376		2664.48	14.4011		2664.48	7.36189
2663.07	37.168		2663.07	29.9401		2663.07	22.5577		2663.07	18.8973		2663.07	14.3067		2663.07	7.02834
2661.67	37.2802		2661.67	29.5186		2661.67	22.4862		2661.67	18.7163		2661.67	13.7978		2661.67	6.84816
2660.26	36.7522		2660.26	28.7734		2660.26	22.1465		2660.26	18.6213		2660.26	13.3898		2660.26	6.51165
2658.86	36.1502		2658.86	28.8902		2658.86	21.8827		2658.86	18.0226		2658.86	13.2369		2658.86	6.40186
2657.45	35.7574		2657.45	28.4372		2657.45	21.5928		2657.45	17.7897		2657.45	12.8405		2657.45	5.96985
2656.05	35.432		2656.05	28.1439		2656.05	21.2623		2656.05	17.6949		2656.05	12.7438		2656.05	5.88892
2654.64	35.0731		2654.64	27.7914		2654.64	21.0687		2654.64	17.4249		2654.64	12.4791		2654.64	5.65811
2653.24	34.3103		2653.24	27.6851		2653.24	20.7821		2653.24	17.2855		2653.24	12.279		2653.24	5.54858
2651.83	34.47		2651.83	27.3056		2651.83	20.8101		2651.83	16.9373		2651.83	12.1656		2651.83	5.33706
2650.42	34.2394		2650.42	27.1584		2650.42	20.3867		2650.42	16.7124		2650.42	11.7138		2650.42	5.19257
2649.02	33.7262		2649.02	26.8701		2649.02	20.3769		2649.02	16.4092		2649.02	11.6705		2649.02	5.08637
2647.61	33.0518		2647.61	26.664		2647.61	20.2303		2647.61	16.3148		2647.61	11.342		2647.61	4.94517
2646.2	33.0502		2646.2	26.2303		2646.2	20.0605		2646.2	16.2279		2646.2	11.1115		2646.2	4.60651
2644.79	32.7999		2644.79	26.1472		2644.79	19.7831		2644.79	16.1969		2644.79	11.0125		2644.79	4.76804
2643.39	32.6101		2643.39	25.9185		2643.39	19.6367		2643.39	15.9946		2643.39	10.9554		2643.39	4.55055
2641.98	32.4204		2641.98	25.8809		2641.98	19.63		2641.98	15.7291		2641.98	10.781		2641.98	4.20262
2640.57	32.3383		2640.57	25.707		2640.57	19.632		2640.57	15.5605		2640.57	10.4977		2640.57	4.26545
2639.16	31.88		2639.16	25.5058		2639.16	19.3665		2639.16	15.4663		2639.16	10.3067		2639.16	4.16277
2637.75	31.9189		2637.75	25.3183		2637.75	19.3395		2637.75	15.1751		2637.75	10.261		2637.75	4.17786
2636.34	31.7295		2636.34	25.0492		2636.34	19.1875		2636.34	15.1517		2636.34	10.0896		2636.34	3.94798
2634.93	31.5066		2634.93	25.239		2634.93	19.0501		2634.93	15.0503		2634.93	10.0775		2634.93	3.81997
2633.52	31.606		2633.52	24.7246		2633.52	19.0029		2633.52	14.8745		2633.52	9.73597		2633.52	3.8542
2632.11	31.2422		2632.11	24.9235		2632.11	18.8307		2632.11	14.9628		2632.11	9.65412		2632.11	3.75487
2630.7	30.637		2630.7	24.5366		2630.7	18.7806		2630.7	14.75		2630.7	9.41607		2630.7	3.6683
2629.29	30.9445		2629.29	24.6628		2629.29	18.6753		2629.29	14.6301		2629.29	9.57697		2629.29	3.43875
2627.88	30.4604		2627.88	24.4712		2627.88	18.5904		2627.88	14.332		2627.88	9.45058		2627.88	3.38723
2626.47	30.5666		2626.47	24.2116		2626.47	18.5549		2626.47	14.4351		2626.47	9.26848		2626.47	3.35162
2625.06	30.4113		2625.06	24.1382		2625.06	18.3395		2625.06	14.1743		2625.06	9.11153		2625.06	3.31284
2623.65	30.189		2623.65	24.269		2623.65	18.333		2623.65	14.0955		2623.65	9.04662		2623.65	3.22327
2622.23	30.2483		2622.23	23.9597		2622.23	18.3208		2622.23	14.1392		2622.23	8.99009		2622.23	3.11785
2620.82	30.1668		2620.82	23.7639		2620.82	18.1142		2620.82	13.9751		2620.82	8.71351		2620.82	2.98391
2619.41	29.8978		2619.41	23.6906		2619.41	17.9832		2619.41	13.9112		2619.41	8.76291		2619.41	2.99284
2618	29.5485		2618	23.7443		2618	18		2618	13.7398		2618	8.55609		2618	2.88754
2616.58	29.6079		2616.58	23.4626		2616.58	18.0544		2616.58	13.6723		2616.58	8.51363		2616.58	2.906
2615.17	29.5802		2615.17	23.5978		2615.17	17.88		2615.17	13.5195		2615.17	8.52685		2615.17	2.58824
2613.75	29.2847		2613.75	23.5518		2613.75	17.8765		2613.75	13.6189		2613.75	8.387		2613.75	2.70189
2612.34	29.2236		2612.34	23.2567		2612.34	17.8962		2612.34	13.292		2612.34	8.33624		2612.34	2.64746
2610.93	29.1492		2610.93	23.2968		2610.93	17.7045		2610.93	13.3024		2610.93	8.17701		2610.93	2.60256
2609.51	28.9811		2609.51	23.2916		2609.51	17.649		2609.51	13.2573		2609.51	8.17082		2609.51	2.50379
2608.1	29.0137		2608.1	23.0873		2608.1	17.6745		2608.1	13.1196		2608.1	8.08677		2608.1	2.38288
2606.68	28.8792		2606.68	23.0957		2606.68	17.674		2606.68	13.1005		2606.68	8.01665		2606.68	2.40142
2605.27	28.7848		2605.27	22.8869		2605.27	17.4883		2605.27	12.9591		2605.27	7.98825		2605.27	2.38511
2603.85	28.5634		2603.85	22.8954		2603.85	17.5138		2603.85	12.9326		2603.85	7.96543		2603.85	2.27063
2602.43	28.6095		2602.43	22.8225		2602.43	17.4671		2602.43	13.0542		2602.43	7.77311		2602.43	2.25118
2601.02	28.435		2601.02	22.9576		2601.02	17.4608		2601.02	12.8389		2601.02	7.71144		2601.02	2.29506
2599.6	28.4677		2599.6	22.8304		2599.6	17.4748		2599.6	12.7384		2599.6	7.59981		2599.6	2.15851
2598.18	28.4136		2598.18	22.7937		2598.18	17.3124		2598.18	12.6824		2598.18	7.69371		2598.18	2.24352
2596.77	28.2393		2596.77	22.5988		2596.77	17.2975		2596.77	12.545		2596.77	7.67374		2596.77	2.11652
2595.35	28.252		2595.35	22.666		2595.35	17.2248		2595.35	12.6406		2595.35	7.52886		2595.35	2.06866
2593.93	28.0377		2593.93	22.6158		2593.93	17.1521		2593.93	12.5921		2593.93	7.43122		2593.93	2.03346
2592.51	28.0972		2592.51	22.5701		2592.51	17.2441		2592.51	12.4548		2592.51	7.55561		2592.51	1.96982
2591.09	27.9831		2591.09	22.4386		2591.09	17.1455		2591.09	12.4062		2591.09	7.37755		2591.09	2.00421
2589.68	28.0759		2589.68	22.4653		2589.68	17.0181		2589.68	12.4427		2589.68	7.40482		2589.68	1.89635
2588.26	28.042		2588.26	22.3158		2588.26	17.1966		2588.26	12.4385		2588.26	7.38215		2588.26	1.98761
2586.84	27.988		2586.84	22.3153		2586.84	17.1847		2586.84	12.3124		2586.84	7.26801		2586.84	1.94615
2585.42	27.9408		2585.42	22.3465		2585.42	17.0428		2585.42	12.3637		2585.42	7.16776		2585.42	1.90154
2584	27.8935		2584	22.364		2584	17.0395		2584	12.2487		2584	7.26156		2584	1.78747
2582.58	27.7663		2582.58	22.35		2582.58	16.918		2582.58	12.2003		2582.58	7.1669		2582.58	1.84079
2581.16	27.8124		2581.16	22.2278		2581.16	17.0618		2581.16	12.3032		2581.16	7.20526		2581.16	1.79623
2579.74	27.7652		2579.74	22.1868		2579.74	16.8884		2579.74	12.2622		2579.74	7.17989		2579.74	1.8085
2578.32	27.658		2578.32	22.1683		2578.32	16.9745		2578.32	12.092		2578.32	7.07976		2578.32	1.74819
2576.9	27.7374		2576.9	22.2445		2576.9	16.9367		2576.9	12.11		2576.9	7.16242		2576.9	1.72576
2575.47	27.5704		2575.47	22.0683		2575.47	16.8469		2575.47	11.951		2575.47	7.13154		2575.47	1.77904
2574.05	27.6498		2574.05	22.131		2574.05	16.8207		2574.05	12.0981		2574.05	7.09237		2574.05	1.662
2572.63	27.5628		2572.63	22.009		2572.63	16.9096		2572.63	12.1198		2572.63	7.08642		2572.63	1.77203
2571.21	27.5955		2571.21	22.0086		2571.21	16.8401		2571.21	12.0789		2571.21	6.97257		2571.21	1.7433
2569.79	27.6482		2569.79	22.0937		2569.79	16.857		2569.79	12.0785		2569.79	6.99155		2569.79	1.69253
2568.36	27.4747		2568.36	22.0843		2568.36	16.871		2568.36	12.008		2568.36	6.96903		2568.36	1.70795
2566.94	27.4011		2566.94	22.0299		2566.94	16.744		2566.94	12.0187		2566.94	7.082		2566.94	1.70131
2565.52	27.3674		2565.52	22.061		2565.52	16.7063		2565.52	11.9815		2565.52	6.96272		2565.52	1.66317
2564.09	27.2738		2564.09	22.0201		2564.09	16.8038		2564.09	12.0952		2564.09	6.89047		2564.09	1.68174
2562.67	27.4994		2562.67	21.9432		2562.67	16.6711		2562.67	11.988		2562.67	7.0172		2562.67	1.58694
2561.24	27.3394		2561.24	21.9473		2561.24	16.7369		2561.24	11.8919		2561.24	6.89248		2561.24	1.55515
2559.82	27.4186		2559.82	21.8345		2559.82	16.8113		2559.82	11.9725		2559.82	6.88382		2559.82	1.665
2558.39	27.5444		2558.39	21.9241		2558.39	16.5982		2558.39	11.9243		2558.39	6.78403		2558.39	1.64264
2556.97	27.2317		2556.97	21.9911		2556.97	16.733		2556.97	11.9497		2556.97	6.90792		2556.97	1.56366
2555.54	27.3707		2555.54	21.9008		2555.54	16.6867		2555.54	11.9162		2555.54	6.87166		2555.54	1.64199
2554.12	27.1246		2554.12	21.8465		2554.12	16.7323		2554.12	11.9342		2554.12	6.8768		2554.12	1.61022
2552.69	27.3034		2552.69	21.927		2552.69	16.5883		2552.69	11.7941		2552.69	6.83504		2552.69	1.55959
2551.27	27.1038		2551.27	21.7784		2551.27	16.7574		2551.27	12.0694		2551.27	6.90917		2551.27	1.58757
2549.84	27.2428		2549.84	21.9936		2549.84	16.6164		2549.84	11.8228		2549.84	6.815		2549.84	1.57154
2548.41	27.2025		2548.41	21.8316		2548.41	16.6276		2548.41	11.94		2548.41	6.80637		2548.41	1.62151
2546.99	27.1954		2546.99	21.8357		2546.99	16.7048		2546.99	11.8257		2546.99	6.86667		2546.99	1.54892
2545.56	27.1817		2545.56	21.8443		2545.56	16.6298		2545.56	11.8511		2545.56	6.72571		2545.56	1.55804
2544.13	27.1879		2544.13	21.8305		2544.13	16.5606		2544.13	11.7185		2544.13	6.78049		2544.13	1.52947
2542.7	27.2008		2542.7	21.7539		2542.7	16.6837		2542.7	11.7733		2542.7	6.75809		2542.7	1.51974
2541.27	27.2799		2541.27	21.8746		2541.27	16.6489		2541.27	11.7839		2541.27	6.83488		2541.27	1.56653
2539.85	27.3125		2539.85	21.798		2539.85	16.6572		2539.85	11.846		2539.85	6.79045		2539.85	1.516
2538.42	27.1332		2538.42	21.7035		2538.42	16.6282		2538.42	11.7905		2538.42	6.81763		2538.42	1.56905
2536.99	27.2388		2536.99	21.7077		2536.99	16.7138		2536.99	11.8819		2536.99	6.78147		2536.99	1.44324
2535.56	27.1986		2535.56	21.7253		2535.56	16.6705		2535.56	11.8338		2535.56	6.69853		2535.56	1.56529
2534.13	26.9863		2534.13	21.7115		2534.13	16.6043		2534.13	11.8078		2534.13	6.71196		2534.13	1.61829
2532.7	27.2308		2532.7	21.8052		2532.7	16.6011		2532.7	11.7525		2532.7	6.7639		2532.7	1.57721
2531.27	27.0186		2531.27	21.675		2531.27	16.6667		2531.27	11.7045		2531.27	6.87085		2531.27	1.5236
2529.84	27.1042		2529.84	21.8985		2529.84	16.6234		2529.84	11.7701		2529.84	6.68343		2529.84	1.63613
2528.41	27.203		2528.41	21.8534		2528.41	16.6803		2528.41	11.7881		2528.41	6.71885		2528.41	1.58253
2526.98	27.0968		2526.98	21.6919		2526.98	16.637		2526.98	11.817		2526.98	6.75425		2526.98	1.48509
2525.55	27.1162		2525.55	21.8929		2525.55	16.6997		2525.55	11.7727		2525.55	6.84462		2525.55	1.5819
2524.11	27.1356		2524.11	21.6867		2524.11	16.6135		2524.11	11.754		2524.11	6.72607		2524.11	1.56593
2522.68	27.0691		2522.68	21.7714		2522.68	16.5531		2522.68	11.7464		2522.68	6.75321		2522.68	1.52804
2521.25	27.0488		2521.25	21.6995		2521.25	16.6415		2521.25	11.7936		2521.25	6.74736		2521.25	1.60288
2519.82	27.0352		2519.82	21.6321		2519.82	16.624		2519.82	11.753		2519.82	6.758		2519.82	1.53683
2518.38	27.0612		2518.38	21.815		2518.38	16.6008		2518.38	11.8331		2518.38	6.70822		2518.38	1.61476
2516.95	27.1929		2516.95	21.6985		2516.95	16.5948		2516.95	11.6974		2516.95	6.70239		2516.95	1.54247
2515.52	26.9877		2515.52	21.716		2515.52	16.6944		2515.52	11.7337		2515.52	6.6444		2515.52	1.51089
2514.08	27.0204		2514.08	21.7737		2514.08	16.6398		2514.08	11.6748		2514.08	6.67426		2514.08	1.60754
2512.65	27.0596		2512.65	21.7555		2512.65	16.5881		2512.65	11.8865		2512.65	6.72333		2512.65	1.56657
2511.22	27.0658		2511.22	21.7596		2511.22	16.5764		2511.22	11.8021		2511.22	6.66262		2511.22	1.61003
2509.78	27.1841		2509.78	21.7905		2509.78	16.676		2509.78	11.7725		2509.78	6.69247		2509.78	1.56282
2508.35	27.2365		2508.35	21.8348		2508.35	16.6585		2508.35	11.7137		2508.35	6.70858		2508.35	1.64063
2506.91	27.2228		2506.91	21.714		2506.91	16.6211		2506.91	11.5928		2506.91	6.66711		2506.91	1.58719
2505.48	27.1169		2505.48	21.7716		2505.48	16.7149		2505.48	11.8408		2505.48	6.8532		2505.48	1.59
2504.04	27.2088		2504.04	21.7311		2504.04	16.5776		2504.04	11.782		2504.04	6.71579		2504.04	1.68338
2502.61	27.3138		2502.61	21.8869		2502.61	16.6772		2502.61	11.8036		2502.61	6.73737		2502.61	1.59249
2501.17	27.1486		2501.17	21.7929		2501.17	16.6968		2501.17	11.8507		2501.17	6.81648		2501.17	1.63588
2499.73	27.1284		2499.73	21.7212		2499.73	16.628		2499.73	11.7591		2499.73	6.7175		2499.73	1.61371
2498.3	27.016		2498.3	21.8902		2498.3	16.6192		2498.3	11.839		2498.3	6.80206		2498.3	1.69452
2496.86	27.1209		2496.86	21.7651		2496.86	16.6616		2496.86	11.8569		2496.86	6.76337		2496.86	1.6193
2495.42	27.2061		2495.42	21.8672		2495.42	16.6356		2495.42	11.8419		2495.42	6.88073		2495.42	1.68449
2493.98	27.0542		2493.98	21.7243		2493.98	16.7179		2493.98	11.8379		2493.98	6.86941		2493.98	1.6592
2492.55	27.1197		2492.55	21.8709		2492.55	16.7574		2492.55	11.936		2492.55	6.83894		2492.55	1.63705
2491.11	27.2443		2491.11	21.8394		2491.11	16.7058		2491.11	11.9538		2491.11	6.84951		2491.11	1.67725
2489.67	27.1978		2489.67	21.839		2489.67	16.6912		2489.67	11.804		2489.67	6.7835		2489.67	1.77666
2488.23	27.1974		2488.23	21.9366		2488.23	16.6482		2488.23	11.8109		2488.23	6.87613		2488.23	1.72644
2486.79	27.3219		2486.79	21.905		2486.79	16.6963		2486.79	11.9745		2486.79	6.86482		2486.79	1.77595
2485.35	27.1241		2485.35	21.9981		2485.35	16.7813		2485.35	11.883		2485.35	6.88632		2485.35	1.72887
2483.91	27.3012		2483.91	21.9977		2483.91	16.8293		2483.91	11.9446		2483.91	6.85041		2483.91	1.83753
2482.47	27.3139		2482.47	21.9795		2482.47	16.8517		2482.47	12.0389		2482.47	6.84731		2482.47	1.7998
2481.03	27.3595		2481.03	21.948		2481.03	16.7745		2481.03	12.0639		2481.03	6.90431		2481.03	1.9302
2479.59	27.3919		2479.59	21.9431		2479.59	16.814		2479.59	12.0562		2479.59	6.99954		2479.59	1.84888
2478.15	27.3651		2478.15	22.045		2478.15	16.7994		2478.15	12.0558		2478.15	6.97183		2478.15	1.92632
2476.71	27.5288		2476.71	22.1068		2476.71	16.853		2476.71	12.1209		2476.71	6.93594		2476.71	1.87304
2475.27	27.548		2475.27	22.1597		2475.27	16.9493		2475.27	12.1278		2475.27	7.00927		2475.27	1.93177
2473.83	27.5147		2473.83	22.0971		2473.83	16.9091		2473.83	12.0946		2473.83	7.03343		2473.83	1.95938
2472.38	27.5799		2472.38	22.1944		2472.38	17.0082		2472.38	12.2069		2472.38	7.0303		2472.38	1.93411
2470.94	27.5334		2470.94	22.1451		2470.94	16.9311		2470.94	12.1919		2470.94	7.11447		2470.94	1.99901
2469.5	27.5329		2469.5	22.087		2469.5	16.9449		2469.5	12.057		2469.5	7.12223		2469.5	2.06078
2468.06	27.7095		2468.06	22.2419		2468.06	17.0609		2468.06	12.1438		2468.06	7.06454		2468.06	2.04794
2466.61	27.6303		2466.61	22.2459		2466.61	17.052		2466.61	12.3323		2466.61	7.12411		2466.61	2.09413
2465.17	27.8068		2465.17	22.1878		2465.17	17.0374		2465.17	12.2955		2465.17	7.13187		2465.17	2.02227
2463.73	27.8062		2463.73	22.3693		2463.73	17.1164		2463.73	12.2224		2463.73	7.18595		2463.73	2.14299
2462.28	27.7533		2462.28	22.3555		2462.28	17.1784		2462.28	12.3636		2462.28	7.18279		2462.28	2.05872
2460.84	27.9428		2460.84	22.3062		2460.84	17.1439		2460.84	12.2469		2460.84	7.23957		2460.84	2.19491
2459.39	28.0011		2459.39	22.4255		2459.39	17.1974		2459.39	12.2646		2459.39	7.14651		2459.39	2.19137
2457.95	27.9023		2457.95	22.4428		2457.95	17.0779		2457.95	12.3077		2457.95	7.2523		2457.95	2.14749
2456.5	28.0196		2456.5	22.5176		2456.5	17.222		2456.5	12.4125		2456.5	7.30358		2456.5	2.0757
2455.06	27.7767		2455.06	22.3443		2455.06	17.2414		2455.06	12.3684		2455.06	7.28135		2455.06	2.11871
2453.61	27.7499		2453.61	22.3438		2453.61	17.1276		2453.61	12.2701		2453.61	7.23462		2453.61	2.12449
2452.17	27.9196		2452.17	22.5471		2452.17	17.1499		2452.17	12.4509		2452.17	7.28588		2452.17	2.21399
2450.72	27.8928		2450.72	22.4669		2450.72	17.1466		2450.72	12.2474		2450.72	7.25005		2450.72	2.09264
2449.28	27.9315		2449.28	22.4974		2449.28	17.2141		2449.28	12.4064		2449.28	7.29857		2449.28	2.19141
2447.83	27.944		2447.83	22.3596		2447.83	17.0948		2447.83	12.2719		2447.83	7.28451		2447.83	2.04842
2446.38	27.865		2446.38	22.5362		2446.38	17.2387		2446.38	12.2606		2446.38	7.2052		2446.38	2.16885
2444.93	27.9625		2444.93	22.4738		2444.93	17.1902		2444.93	12.4195		2444.93	7.2102		2444.93	2.00424
2443.49	27.9488		2443.49	22.5087		2443.49	17.0511		2443.49	12.3176		2443.49	7.29401		2443.49	2.06268
2442.04	27.909		2442.04	22.3887		2442.04	17.2261		2442.04	12.299		2442.04	7.29627		2442.04	2.0375
2440.59	27.6731		2440.59	22.2821		2440.59	17.1606		2440.59	12.2913		2440.59	7.24148		2440.59	1.90087
2439.14	27.6922		2439.14	22.3966		2439.14	17.047		2439.14	12.3162		2439.14	7.21658		2439.14	1.94073
2437.69	27.7962		2437.69	22.3254		2437.69	17.106		2437.69	12.2325		2437.69	7.13195		2437.69	1.8506
2436.24	27.8413		2436.24	22.3559		2436.24	17.0236		2436.24	12.2393		2436.24	7.12609		2436.24	1.62746
2434.79	27.5469		2434.79	22.3422		2434.79	16.9639		2434.79	11.9423		2434.79	7.0578		2434.79	1.72612
2433.34	27.7945		2433.34	22.4212		2433.34	17.0143		2433.34	12.0612		2433.34	7.01667		2433.34	1.66702
2431.89	27.6046		2431.89	22.2661		2431.89	16.8981		2431.89	11.9343		2431.89	7.11939		2431.89	1.63267
2430.44	27.5193		2430.44	22.0184		2430.44	16.8582		2430.44	11.8688		2430.44	6.98331		2430.44	1.56742
2428.99	27.4209		2428.99	22.0268		2428.99	16.7901		2428.99	11.8323		2428.99	6.85542		2428.99	1.51147
2427.54	27.4008		2427.54	22.022		2427.54	16.7248		2427.54	11.7127		2427.54	6.8442		2427.54	1.37519
2426.09	27.2699		2426.09	21.9245		2426.09	16.6736		2426.09	11.828		2426.09	6.84926		2426.09	1.43671
2424.64	27.126		2424.64	21.8711		2424.64	16.5802		2424.64	11.7229		2424.64	6.86515		2424.64	1.35611
2423.19	26.9951		2423.19	21.6854		2423.19	16.6081		2423.19	11.7333		2423.19	6.76992		2423.19	1.33731
2421.74	27.0795		2421.74	21.6542		2421.74	16.4498		2421.74	11.5417		2421.74	6.73162		2421.74	1.36792
2420.28	27.1247		2420.28	21.6671		2420.28	16.5116		2420.28	11.5558		2420.28	6.66625		2420.28	1.38617
2418.83	26.8311		2418.83	21.6668		2418.83	16.5197		2418.83	11.5158		2418.83	6.60633		2418.83	1.22539
2417.38	26.9675		2417.38	21.6444		2417.38	16.5081		2417.38	11.3856		2417.38	6.58705		2417.38	1.3239
2415.92	26.7456		2415.92	21.5074		2415.92	16.4487		2415.92	11.5765		2415.92	6.6111		2415.92	1.22181
2414.47	26.7779		2414.47	21.5071		2414.47	16.3497		2414.47	11.4752		2414.47	6.45376		2414.47	1.1753
2413.02	26.758		2413.02	21.476		2413.02	16.3551		2413.02	11.4533		2413.02	6.5455		2413.02	1.19974
2411.56	26.8618		2411.56	21.5109		2411.56	16.3182		2411.56	11.471		2411.56	6.48836		2411.56	1.1995
2410.11	26.6401		2410.11	21.449		2410.11	16.2982		2410.11	11.4166		2410.11	6.49347		2410.11	1.20851
2408.65	26.6333		2408.65	21.3606		2408.65	16.2586		2408.65	11.3587		2408.65	6.3985		2408.65	1.15895
2407.2	26.7761		2407.2	21.3471		2407.2	16.323		2407.2	11.38		2407.2	6.45772		2407.2	1.20186
2405.74	26.6586		2405.74	21.3777		2405.74	16.32		2405.74	11.3437		2405.74	6.40335		2405.74	1.1061
2404.29	26.5152		2404.29	21.5622		2404.29	16.3169		2404.29	11.3975		2404.29	6.42469		2404.29	1.18906
2402.83	26.5735		2402.83	21.3111		2402.83	16.2575		2402.83	11.354		2402.83	6.37576		2402.83	1.23502
2401.38	26.4821		2401.38	21.3197		2401.38	16.277		2401.38	11.2673		2401.38	6.33224		2401.38	1.14855
2399.92	26.4883		2399.92	21.3106		2399.92	16.2739		2399.92	11.3247		2399.92	6.30766		2399.92	1.19142
2398.46	26.5855		2398.46	21.3279		2398.46	16.3102		2398.46	11.4036		2398.46	6.36953		2398.46	1.21581
2397.01	26.4098		2397.01	21.2265		2397.01	16.3212		2397.01	11.3421		2397.01	6.39356		2397.01	1.10478
2395.55	26.4355		2395.55	21.1867		2395.55	16.2507		2395.55	11.2447		2395.55	6.37708		2395.55	1.16917
2394.09	26.4936		2394.09	21.3491		2394.09	16.2701		2394.09	11.2768		2394.09	6.32011		2394.09	1.12587
2392.63	26.5778		2392.63	21.3401		2392.63	16.2839		2392.63	11.3305		2392.63	6.24967		2392.63	1.1687
2391.18	26.4736		2391.18	21.3574		2391.18	16.2106		2391.18	11.3231		2391.18	6.298		2391.18	1.14079
2389.72	26.3759		2389.72	21.322		2389.72	16.2188		2389.72	11.2904		2389.72	6.25997		2389.72	1.06986
2388.26	26.5119		2388.26	21.2646		2388.26	16.2466		2388.26	11.2866		2388.26	6.31906		2388.26	1.16493
2386.8	26.3948		2386.8	21.1941		2386.8	16.2941		2386.8	11.3223		2386.8	6.26485		2386.8	1.06635
2385.34	26.4659		2385.34	21.2773		2385.34	16.1731		2385.34	11.2789		2385.34	6.29696		2385.34	1.16446
2383.88	26.4851		2383.88	21.2463		2383.88	16.2767		2383.88	11.2786		2383.88	6.28861		2383.88	1.13044
2382.42	26.4329		2382.42	21.1802		2382.42	16.2625		2382.42	11.2281		2382.42	6.28296		2382.42	1.06879
2380.96	26.4261		2380.96	21.2239		2380.96	16.2285		2380.96	11.192		2380.96	6.30426		2380.96	1.1699
2379.5	26.4453		2379.5	21.2499		2379.5	16.2283		2379.5	11.2528		2379.5	6.27975		2379.5	1.15125
2378.04	26.432		2378.04	21.2541		2378.04	16.1495		2378.04	11.1951		2378.04	6.23909		2378.04	1.13874
2376.58	26.4318		2376.58	21.2275		2376.58	16.1577		2376.58	11.3168		2376.58	6.23077		2376.58	1.17534
2375.12	26.5286		2375.12	21.1878		2375.12	16.2444		2375.12	11.2879		2375.12	6.20629		2375.12	1.14442
2373.66	26.3017		2373.66	21.2577		2373.66	16.1264		2373.66	11.119		2373.66	6.16297		2373.66	1.13805
2372.19	26.4697		2372.19	21.1348		2372.19	16.2299		2372.19	11.2515		2372.19	6.26502		2372.19	1.07035
2370.73	26.3853		2370.73	21.2178		2370.73	16.2548		2370.73	11.2118		2370.73	6.21094		2370.73	1.09467
2369.27	26.3268		2369.27	21.1562		2369.27	16.1622		2369.27	11.1506		2369.27	6.20801		2369.27	1.12817
2367.81	26.4042		2367.81	21.1822		2367.81	16.1759		2367.81	11.2579		2367.81	6.16742		2367.81	1.05439
2366.34	26.3456		2366.34	21.1732		2366.34	16.2065		2366.34	11.1323		2366.34	6.1645		2366.34	1.09708
2364.88	26.2225		2364.88	21.208		2364.88	16.2426		2364.88	11.1678		2364.88	6.17771		2364.88	1.11218
2363.42	26.4292		2363.42	21.1728		2363.42	16.1221		2363.42	11.1891		2363.42	6.25543		2363.42	1.12421
2361.95	26.3772		2361.95	21.2557		2361.95	16.1498		2361.95	11.3106		2361.95	6.14767		2361.95	1.10254
2360.49	26.267		2360.49	21.2379		2360.49	16.0825		2360.49	11.1922		2360.49	6.2388		2360.49	1.03496
2359.02	26.4606		2359.02	21.1808		2359.02	16.141		2359.02	11.1562		2359.02	6.26274		2359.02	1.12659
2357.56	26.441		2357.56	21.1893		2357.56	16.1491		2357.56	11.2597		2357.56	6.23562		2357.56	1.04066
2356.09	26.4277		2356.09	21.259		2356.09	16.1657		2356.09	11.2058		2356.09	6.25417		2356.09	1.10778
2354.63	26.2014		2354.63	21.1146		2354.63	16.199		2354.63	11.1877		2354.63	6.19485		2354.63	1.07696
2353.16	26.3497		2353.16	21.2673		2353.16	16.1736		2353.16	11.1088		2353.16	6.16508		2353.16	1.12263
2351.7	26.2848		2351.7	21.1928		2351.7	16.1678		2351.7	11.2087		2351.7	6.17827		2351.7	1.09488
2350.23	26.2717		2350.23	21.127		2350.23	16.2038		2350.23	11.2263		2350.23	6.15925		2350.23	1.07326
2348.76	26.3876		2348.76	21.1486		2348.76	16.1366		2348.76	11.2225		2348.76	6.15365		2348.76	1.13724
2347.29	26.2841		2347.29	21.1658		2347.29	16.1475		2347.29	11.1436		2347.29	6.16683		2347.29	1.11867
2345.83	26.3999		2345.83	21.1656		2345.83	16.164		2345.83	11.1934		2345.83	6.16123		2345.83	1.0665
2344.36	26.3932		2344.36	21.1566		2344.36	16.1024		2344.36	11.2217		2344.36	6.27629		2344.36	1.02046
2342.89	26.3478		2342.89	21.1084		2342.89	16.2082		2342.89	11.2036		2342.89	6.17685		2342.89	1.00192
2341.42	26.3604		2341.42	21.0995		2341.42	16.1466		2341.42	11.0855		2341.42	6.17929		2341.42	1.07502
2339.96	26.2699		2339.96	21.1996		2339.96	16.1966		2339.96	11.1746		2339.96	6.16566		2339.96	1.02595
2338.49	26.3599		2338.49	21.1862		2338.49	16.1824		2338.49	11.2636		2338.49	6.1306		2338.49	1.05627
2337.02	26.4047		2337.02	21.1816		2337.02	16.1905		2337.02	11.1705		2337.02	6.15716		2337.02	0.98586
2335.55	26.3851		2335.55	21.225		2335.55	16.1457		2335.55	11.2488		2335.55	6.17835		2335.55	1.03754
2334.08	26.3912		2334.08	21.3555		2334.08	16.2541		2334.08	11.3698		2334.08	6.27182		2334.08	1.0953
2332.61	26.7709		2332.61	21.4075		2332.61	16.2706		2332.61	11.3981		2332.61	6.42148		2332.61	1.21404
2331.14	26.5967		2331.14	21.3985		2331.14	16.3233		2331.14	11.4584		2331.14	6.33822		2331.14	1.22905
2329.67	26.6543		2329.67	21.5115		2329.67	16.2812		2329.67	11.4581		2329.67	6.26303		2329.67	1.20136
2328.2	26.4416		2328.2	21.1715		2328.2	16.1501		2328.2	11.2868		2328.2	6.23067		2328.2	1.06393
2326.73	26.2483		2326.73	21.1843		2326.73	16.1359		2326.73	11.1582		2326.73	6.15286		2326.73	1.06067
2325.26	26.2609		2325.26	21.1101		2325.26	16.2053		2325.26	11.1865		2325.26	6.1553		2325.26	1.0757
2323.79	26.2928		2323.79	21.0924		2323.79	16.1744		2323.79	11.1934		2323.79	6.131		2323.79	0.97494
2322.31	26.1961		2322.31	21.0748		2322.31	16.0991		2322.31	11.0542		2322.31	6.08533		2322.31	1.05089
2320.84	26.3309		2320.84	21.0877		2320.84	16.0404		2320.84	11.1181		2320.84	6.13589		2320.84	1.03241
2319.37	26.2985		2319.37	21.057		2319.37	16.0569		2319.37	11.036		2319.37	6.16506		2319.37	1.01393
2317.89	26.2725		2317.89	21.0829		2317.89	16.0317		2317.89	11.0999		2317.89	6.10872		2317.89	1.03808
2316.42	26.2273		2316.42	21.1		2316.42	16.0926		2316.42	11.1174		2316.42	6.13254		2316.42	0.98613
2314.95	26.1692		2314.95	20.9868		2314.95	16.123		2314.95	11.103		2314.95	6.17237		2314.95	1.01941
2313.47	26.079		2313.47	21.0822		2313.47	16.1922		2313.47	11.1597		2313.47	6.1214		2313.47	1.0405
2312	26.2586		2312	21.0863		2312	16.0948		2312	11.1345		2312	6.1105		2312	1.01596
2310.53	26.1749		2310.53	21.0905		2310.53	16.064		2310.53	11.0561		2310.53	6.16365		2310.53	0.95797
2309.05	26.1875		2309.05	21.138		2309.05	16.1582		2309.05	11.0808		2309.05	6.14741		2309.05	1.04596
2307.58	26.3156		2307.58	21.1248		2307.58	16.1469		2307.58	11.1907		2307.58	6.11783		2307.58	1.04878
2306.1	26.2384		2306.1	21.0247		2306.1	16.0744		2306.1	11.0483		2306.1	6.17096		2306.1	0.93916
2304.62	26.3408		2304.62	21.0809		2304.62	16.077		2304.62	11.0908		2304.62	6.05605		2304.62	0.94809
2303.15	26.2314		2303.15	21.0416		2303.15	16.1573		2303.15	11.0906		2303.15	6.16515		2303.15	0.99954
2301.67	26.2248		2301.67	21.0414		2301.67	16.1265		2301.67	11.1152		2301.67	6.15959		2301.67	1.01453
2300.2	26.2438		2300.2	21.1063		2300.2	16.0403		2300.2	11.1363		2300.2	6.19933		2300.2	1.0538
2298.72	26.2179		2298.72	20.9673		2298.72	16.115		2298.72	11.0934		2298.72	6.11915		2298.72	0.97769
2297.24	26.2881		2297.24	21.0928		2297.24	16.0177		2297.24	11.1713		2297.24	6.04966		2297.24	0.98963
2295.77	26.2302		2295.77	21.0709		2295.77	16.0785		2295.77	11.0291		2295.77	6.13468		2295.77	0.97426
2294.29	26.1275		2294.29	20.9927		2294.29	16.142		2294.29	11.1247		2294.29	6.08119		2294.29	1.03779
2292.81	26.2233		2292.81	21.0532		2292.81	16.0669		2292.81	11.1067		2292.81	6.23274		2292.81	1.00724
2291.33	26.1462		2291.33	21.0833		2291.33	16.0723		2291.33	11.1775		2291.33	6.13666		2291.33	1.01917
2289.85	26.2164		2289.85	21.0787		2289.85	16.0194		2289.85	11.0602		2289.85	6.09119		2289.85	1.05535
2288.38	26.2994		2288.38	21.0655		2288.38	16.0691		2288.38	11.0813		2288.38	6.08564		2288.38	1.04605
2286.9	26.1711		2286.9	21.035		2286.9	16.0495		2286.9	11.1059		2286.9	6.0668		2286.9	1.01249
2285.42	26.2093		2285.42	21.0694		2285.42	16.0327		2285.42	11.056		2285.42	6.06659		2285.42	0.93955
2283.94	26.1323		2283.94	21.0346		2283.94	16.0214		2283.94	11.1515		2283.94	6.06106		2283.94	0.96057
2282.46	26.2919		2282.46	21.1253		2282.46	16.107		2282.46	11.0804		2282.46	6.14592		2282.46	1.06641
2280.98	26.1638		2280.98	21.0601		2280.98	16.0154		2280.98	11.0731		2280.98	6.13772		2280.98	0.92081
2279.5	26.2019		2279.5	21.0556		2279.5	16.148		2279.5	11.0233		2279.5	6.04447		2279.5	0.96302
2278.02	26.2017		2278.02	21.0857		2278.02	16.1008		2278.02	11.0443		2278.02	6.06552		2278.02	0.95677
2276.54	26.2206		2276.54	21.0422		2276.54	16.1116		2276.54	11.0866		2276.54	6.04405		2276.54	1.02317
2275.05	26.2523		2275.05	21.0636		2275.05	16.1169		2275.05	11.1324		2275.05	6.15539		2275.05	1.03205
2273.57	26.1179		2273.57	21.1109		2273.57	16.1305		2273.57	11.1534		2273.57	6.13392		2273.57	1.00461
2272.09	26.2007		2272.09	21.0978		2272.09	16.0446		2272.09	11.1284		2272.09	6.08324		2272.09	1.02558
2270.61	26.226		2270.61	21.1451		2270.61	16.1024		2270.61	11.0963		2270.61	6.05648		2270.61	0.92858
2269.12	26.1939		2269.12	21.0325		2269.12	16.0525		2269.12	11.0891		2269.12	6.0775		2269.12	1.03424
2267.64	26.2638		2267.64	20.9546		2267.64	16.0661		2267.64	11.0499		2267.64	6.11974		2267.64	1.02496
2266.16	26.1423		2266.16	21.0623		2266.16	16.1266		2266.16	11.0745		2266.16	6.10625		2266.16	1.02778
2264.67	26.1867		2264.67	21.0492		2264.67	16.0297		2264.67	11.0389		2264.67	6.1352		2264.67	0.97619
2263.19	26.1419		2263.19	21.0144		2263.19	16.1096		2263.19	11.0634		2263.19	5.99973		2263.19	1.01226
2261.71	26.2564		2261.71	21.0617		2261.71	16.0293		2261.71	11.0668		2261.71	6.05786		2261.71	1.02414
2260.22	26.1541		2260.22	21.083		2260.22	16.0153		2260.22	11.0348		2260.22	6.0709		2260.22	1.03299
2258.74	26.2942		2258.74	21.0009		2258.74	16.0538		2258.74	11.0769		2258.74	6.17404		2258.74	1.02674
2257.25	26.0963		2257.25	21.0309		2257.25	16.0535		2257.25	11.0202		2257.25	6.05987		2257.25	1.01748
2255.77	26.1853		2255.77	21.1298		2255.77	16.0781		2255.77	11.1047		2255.77	6.0729		2255.77	1.06255
2254.28	26.1596		2254.28	21.0606		2254.28	16.0807		2254.28	11.0657		2254.28	6.08063		2254.28	0.98387
2252.79	26.2549		2252.79	21.0259		2252.79	16.097		2252.79	11.1078		2252.79	6.02745		2252.79	0.98971
2251.31	26.1782		2251.31	20.9912		2251.31	16.0306		2251.31	11.0617		2251.31	6.02989		2251.31	0.92314
2249.82	26.1143		2249.82	21.0255		2249.82	16.1351		2249.82	11.0404		2249.82	6.06939		2249.82	0.90485
2248.34	26.165		2248.34	21.0555		2248.34	16.19		2248.34	11.1036		2248.34	6.11945		2248.34	0.97101
2246.85	26.2603		2246.85	21.1112		2246.85	16.0383		2246.85	11.0223		2246.85	6.02927		2246.85	1.007
2245.36	26.19		2245.36	21.0077		2245.36	16.0353		2245.36	11.1032		2245.36	6.05287		2245.36	0.94952
2243.87	26.1452		2243.87	21.0763		2243.87	16.1122		2243.87	11.1241		2243.87	6.0791		2243.87	0.95536
2242.38	26.2213		2242.38	21.0159		2242.38	15.9799		2242.38	11.0041		2242.38	6.07624		2242.38	1.0546
2240.9	26.2656		2240.9	21.0759		2240.9	16.1117		2240.9	11.0461		2240.9	6.0443		2240.9	0.93991
2239.41	26.0682		2239.41	21.1058		2239.41	16.1005		2239.41	11.1128		2239.41	6.02823		2239.41	0.99996
2237.92	26.2715		2237.92	21.0066		2237.92	16.0975		2237.92	11.0915		2237.92	6.07295		2237.92	1.03288
2236.43	26.1504		2236.43	21.0495		2236.43	16.0863		2236.43	11.0244		2236.43	6.00668		2236.43	0.94235
2234.94	26.0676		2234.94	21.0191		2234.94	16.0146		2234.94	10.996		2234.94	6.12535		2234.94	1.00838
2233.45	26.15		2233.45	21.0576		2233.45	16.0941		2233.45	11.0592		2233.45	6.06173		2233.45	0.96304
2231.96	26.2323		2231.96	21.0746		2231.96	16.0802		2231.96	11.073		2231.96	6.06416		2231.96	0.95081
2230.47	26.1304		2230.47	21.0443		2230.47	16.0799		2230.47	11.0236		2230.47	6.07451		2230.47	0.98972
2228.98	26.054		2228.98	21.0226		2228.98	16.0358		2228.98	11.0304		2228.98	6.09804		2228.98	1.02261
2227.49	26.1173		2227.49	21.0697		2227.49	16.0795		2227.49	11.0442		2227.49	6.02657		2227.49	0.98933
2226	26.1996		2226	21.0523		2226	16.0738		2226	11.0405		2226	6.1319		2226	0.98612
2224.51	26.1613		2224.51	21.0692		2224.51	15.9994		2224.51	11.0122		2224.51	6.10266		2224.51	0.9769
2223.01	26.326		2223.01	21.0819		2223.01	16.0349		2223.01	11.026		2223.01	6.0365		2223.01	0.92261
2221.52	26.2686		2221.52	21.043		2221.52	16.1143		2221.52	11.1066		2221.52	6.07057		2221.52	1.02458
2220.03	26.1415		2220.03	20.9956		2220.03	16.1031		2220.03	11.1169		2220.03	6.07826		2220.03	0.96429
2218.54	26.0969		2218.54	20.9783		2218.54	16.0453		2218.54	11.0886		2218.54	6.14921		2218.54	1.01215
2217.04	26.1728		2217.04	21.1668		2217.04	16.0643		2217.04	11.0252		2217.04	6.14898		2217.04	0.97291
2215.55	26.3246		2215.55	21.0593		2215.55	16.0942		2215.55	11.1022		2215.55	6.07234		2215.55	0.97572
2214.06	26.1723		2214.06	21.0377		2214.06	16.0584		2214.06	11.0739		2214.06	6.0932		2214.06	1.03555
2212.56	26.2037		2212.56	21.0718		2212.56	16.0115		2212.56	11.0491		2212.56	6.05084		2212.56	0.99333
2211.07	26.2035		2211.07	21.0201		2211.07	16.0689		2211.07	11.063		2211.07	6.09539		2211.07	0.97213
2209.57	26.2033		2209.57	20.9985		2209.57	16.0303		2209.57	10.9961		2209.57	6.12676		2209.57	0.99893
2208.08	26.3043		2208.08	21.0197		2208.08	16.0465		2208.08	11.1187		2208.08	6.10284		2208.08	0.99573
2206.58	26.2344		2206.58	21.0709		2206.58	16.0737		2206.58	11.0238		2206.58	6.06051		2206.58	0.97154
2205.09	26.2089		2205.09	21.0364		2205.09	16.1146		2205.09	11.0236		2205.09	6.03136		2205.09	0.95335
2203.59	26.139		2203.59	21.0705		2203.59	16.0486		2203.59	11.0409		2203.59	6.09691		2203.59	0.98913
2202.1	26.2843		2202.1	21.0232		2202.1	16.0457		2202.1	11.0477		2202.1	6.08354		2202.1	1.03388
2200.6	26.1702		2200.6	20.9416		2200.6	16.0318		2200.6	11.086		2200.6	6.02284		2200.6	0.98873
2199.1	26.2648		2199.1	21.1298		2199.1	16.0453		2199.1	11.0578		2199.1	6.09625		2199.1	1.02448
2197.6	26.1444		2197.6	21.0525		2197.6	16.0642		2197.6	11.0225		2197.6	6.07237		2197.6	1.02427
2196.11	26.2643		2196.11	21.0266		2196.11	16.0722		2196.11	11.0223		2196.11	6.10369		2196.11	1.01209
2194.61	26.2008		2194.61	20.9879		2194.61	16.0556		2194.61	10.9836		2194.61	6.04829		2194.61	0.96099
2193.11	26.3206		2193.11	21.1246		2193.11	16.0472		2193.11	11.1129		2193.11	6.07435		2193.11	1.02365
2191.61	26.213		2191.61	21.0346		2191.61	16.0032		2191.61	11.0532		2191.61	6.04524		2191.61	1.01147
2190.12	26.1811		2190.12	20.9831		2190.12	16.0713		2190.12	11.06		2190.12	6.07391		2190.12	1.01127
2188.62	26.2125		2188.62	21.141		2188.62	16.1039		2188.62	11.0528		2188.62	6.06582		2188.62	0.99611
2187.12	26.187		2187.12	21.0852		2187.12	16.0272		2187.12	11.063		2187.12	6.08923		2187.12	0.96899
2185.62	26.1489		2185.62	21.0636		2185.62	16.0516		2185.62	10.9824		2185.62	6.04964		2185.62	0.92992
2184.12	26.2433		2184.12	21.0463		2184.12	16.0923		2184.12	11.136		2184.12	6.06517		2184.12	0.89386
2182.62	26.1295		2182.62	20.9778		2182.62	16.0593		2182.62	11.0519		2182.62	6.09906		2182.62	0.95346
2181.12	26.2239		2181.12	21.0075		2181.12	16.0482		2181.12	10.9713		2181.12	6.01491		2181.12	0.87856
2179.62	26.0155		2179.62	20.9561		2179.62	16.0507		2179.62	11.0759		2179.62	6.00946		2179.62	0.92917
2178.12	26.1918		2178.12	21.0497		2178.12	16.0396		2178.12	11.0163		2178.12	6.06693		2178.12	0.93496
2176.61	26.1664		2176.61	21.0922		2176.61	15.9657		2176.61	11.0999		2176.61	6.0274		2176.61	0.96164
2175.11	26.2355		2175.11	21.0109		2175.11	16.0883		2175.11	11.002		2175.11	6.12415		2175.11	1.03311
2173.61	26.1785		2173.61	20.9638		2173.61	15.9871		2173.61	11.0402		2173.61	6.04009		2173.61	0.95528
2172.11	26.1657		2172.11	20.9679		2172.11	16.0442		2172.11	10.9457		2172.11	5.97963		2172.11	0.82974
2170.61	26.1087		2170.61	21.006		2170.61	16.0085		2170.61	11.0153		2170.61	6.06323		2170.61	0.94595
2169.1	26.1463		2169.1	20.976		2169.1	16.0084		2169.1	11.0884		2169.1	5.98971		2169.1	0.99051
2167.6	26.1839		2167.6	20.9758		2167.6	16.0436		2167.6	11.0009		2167.6	5.96856		2167.6	0.99627
2166.1	26.1899		2166.1	21.1162		2166.1	16.0107		2166.1	10.9484		2166.1	6.08876		2166.1	0.89467
2164.59	26.1141		2164.59	21.0606		2164.59	16.0132		2164.59	11.0006		2164.59	5.98649		2164.59	0.94816
2163.09	26.1769		2163.09	21.0263		2163.09	15.9204		2163.09	11.0213		2163.09	6.0046		2163.09	0.99567
2161.58	26.1892		2161.58	20.9537		2161.58	16.0237		2161.58	11.028		2161.58	5.99917		2161.58	0.94778
2160.08	26.0191		2160.08	21.0131		2160.08	16.0126		2160.08	11.108		2160.08	6.03035		2160.08	0.87607
2158.57	26.1887		2158.57	21.0598		2158.57	16.0096		2158.57	10.944		2158.57	6.08504		2158.57	0.95335
2157.07	26.1067		2157.07	20.9021		2157.07	16.053		2157.07	10.9055		2157.07	6.03516		2157.07	0.92635
2155.56	26.0939		2155.56	21.0338		2155.56	16.0174		2155.56	11.055		2155.56	5.9879		2155.56	0.91127
2154.06	26.188		2154.06	21.0464		2154.06	15.9519		2154.06	11.027		2154.06	6.006		2154.06	0.8962
2152.55	26.0809		2152.55	21.0546		2152.55	16.0415		2152.55	10.9641		2152.55	5.96138		2152.55	0.9377
2151.04	26.1121		2151.04	21.0417		2151.04	15.9733		2151.04	10.9848		2151.04	6.04477		2151.04	0.93751
2149.54	26.0993		2149.54	20.965		2149.54	15.9975		2149.54	10.9463		2149.54	6.00277		2149.54	0.98493
2148.03	26.1305		2148.03	21.0115		2148.03	16.0707		2148.03	10.9218		2148.03	6.00257		2148.03	0.89548
2146.52	26.124		2146.52	21.1133		2146.52	15.9319		2146.52	11.0398		2146.52	6.06762		2146.52	0.94288
2145.02	26.1426		2145.02	21.0493		2145.02	16.1165		2145.02	11.0605		2145.02	6.00216		2145.02	0.92782
2143.51	26.0796		2143.51	20.9981		2143.51	16.0456		2143.51	11.0777		2143.51	6.02022		2143.51	0.92764
2142	26.0668		2142	21.0829		2142	15.9965		2142	11.0496		2142	6.03306		2142	0.9869
2140.49	26.0666		2140.49	20.9595		2140.49	16.0289		2140.49	10.9799		2140.49	6.0798		2140.49	0.92429
2138.98	26.0915		2138.98	20.9169		2138.98	16.0368		2138.98	11.0075		2138.98	5.94137		2138.98	0.98353
2137.47	26.1414		2137.47	20.9506		2137.47	15.9661		2137.47	11.0073		2137.47	6.03243		2137.47	0.93877
2135.96	26.1726		2135.96	20.908		2135.96	16.031		2135.96	11.0349		2135.96	6.04265		2135.96	0.94749
2134.45	26.1222		2134.45	21.0521		2134.45	16.0335		2134.45	10.9861		2134.45	5.9825		2134.45	1.00966
2132.94	26.1972		2132.94	21.0264		2132.94	16.0441		2132.94	11.0484		2132.94	6.05265		2132.94	0.90851
2131.43	26.1531		2131.43	20.9923		2131.43	15.9626		2131.43	11.0273		2131.43	6.09672		2131.43	0.90832
2129.92	26.04		2129.92	20.9624		2129.92	16.0681		2129.92	10.9751		2129.92	6.01055		2129.92	0.89627
2128.41	26.1902		2128.41	21.0682		2128.41	16.076		2128.41	11.0373		2128.41	5.98691		2128.41	0.91982
2126.9	26.2463		2126.9	20.9959		2126.9	16.0162		2126.9	11.051		2126.9	5.96068		2126.9	0.99083
2125.39	26.0958		2125.39	20.9491		2125.39	16.0377		2125.39	10.9849		2125.39	6.06199		2125.39	0.91648
2123.88	26.1519		2123.88	20.9828		2123.88	16.0266		2123.88	11.0124		2123.88	6.04096		2123.88	0.96374
2122.36	26.0765		2122.36	20.9402		2122.36	16.0887		2122.36	10.9741		2122.36	5.9731		2122.36	0.9843
2120.85	25.8886		2120.85	21.0248		2120.85	15.9748		2120.85	11.0016		2120.85	5.9599		2120.85	0.91889
2119.34	26.1637		2119.34	20.9187		2119.34	15.9746		2119.34	11.0083		2119.34	6.03512		2119.34	0.94241
2117.82	26.2448		2117.82	21.0328		2117.82	16.0339		2117.82	11.1121		2117.82	6.00371		2117.82	0.90963
2116.31	26.2445		2116.31	20.9141		2116.31	15.9823		2116.31	11.0426		2116.31	5.99311		2116.31	0.99831
2114.8	26.188		2114.8	20.9435		2114.8	15.9983		2114.8	11.0077		2114.8	5.99811		2114.8	0.9063
2113.28	26.1377		2113.28	20.9433		2113.28	16.0062		2113.28	10.9833		2113.28	5.96412		2113.28	0.98903
2111.77	26.125		2111.77	21.0193		2111.77	16.0574		2111.77	10.9069		2111.77	6.00809		2111.77	0.94442
2110.25	26.0186		2110.25	21.1671		2110.25	16.0247		2110.25	11.0037		2110.25	6.02867		2110.25	0.89687
2108.74	26.2245		2108.74	21.0358		2108.74	15.9705		2108.74	11.0104		2108.74	6.00768		2108.74	0.99434
2107.22	26.1493		2107.22	21.0229		2107.22	16.0432		2107.22	11.0897		2107.22	6.03344		2107.22	0.96159
2105.71	26.1303		2105.71	21.0396		2105.71	16.0457		2105.71	11.0169		2105.71	5.97093		2105.71	0.9259
2104.19	26.1863		2104.19	21.0309		2104.19	16.0293		2104.19	11.0028		2104.19	5.95516		2104.19	0.92867
2102.67	26.2173		2102.67	21.0138		2102.67	15.9589		2102.67	11.0822		2102.67	6.04579		2102.67	0.91961
2101.16	26.0797		2101.16	20.9376		2101.16	16.0154		2101.16	11.0508		2101.16	6.01185		2101.16	0.92534
2099.64	26.067		2099.64	21.0556		2099.64	15.9909		2099.64	10.9884		2099.64	6.01943		2099.64	0.99609
2098.12	26.1542		2098.12	21.0301		2098.12	16.0582		2098.12	10.9882		2098.12	6.01403		2098.12	0.96042
2096.61	26.1477		2096.61	20.9708		2096.61	15.9473		2096.61	10.9569		2096.61	5.99568		2096.61	0.93659
2095.09	26.1163		2095.09	21.0043		2095.09	15.9768		2095.09	10.9325		2095.09	6.01362		2095.09	0.99253
2093.57	26.035		2093.57	20.9915		2093.57	16.0009		2093.57	11.0187		2093.57	6.05229		2093.57	0.93621
2092.05	26.122		2092.05	21.0419		2092.05	16.0088		2092.05	11.0737		2092.05	6.0443		2092.05	0.93602
2090.53	26.1093		2090.53	20.9025		2090.53	15.9978		2090.53	10.9872		2090.53	5.98968		2090.53	0.89745
2089.01	26.134		2089.01	21.012		2089.01	16.0326		2089.01	10.9939		2089.01	6.0387		2089.01	0.97106
2087.49	26.0591		2087.49	20.978		2087.49	16.0755		2087.49	11.004		2087.49	6.02554		2087.49	0.87643
2085.97	26.1087		2085.97	21.0073		2085.97	15.9702		2085.97	10.9452		2085.97	6.01497		2085.97	0.95001
2084.46	26.0773		2084.46	20.965		2084.46	16.0455		2084.46	11.0657		2084.46	6.03807		2084.46	0.88197
2082.93	26.102		2082.93	20.9901		2082.93	16.0237		2082.93	11.0276		2082.93	6.0275		2082.93	0.91129
2081.41	26.0644		2081.41	20.9983		2081.41	16.0477		2081.41	11.0274		2081.41	6.04799		2081.41	0.89046
2079.89	26.1015		2079.89	20.9349		2079.89	16.0798		2079.89	10.9582		2079.89	6.03743		2079.89	0.91681
2078.37	26.1324		2078.37	20.9937		2078.37	16.0446		2078.37	10.9511		2078.37	6.06826		2078.37	0.9402
2076.85	26.2442		2076.85	21.0019		2076.85	16.0202		2076.85	10.9751		2076.85	6.02667		2076.85	0.92823
2075.33	26.1444		2075.33	21.0227		2075.33	16.0819		2075.33	11.0747		2075.33	6.05231		2075.33	0.97223
2073.81	26.1193		2073.81	20.9678		2073.81	16.0036		2073.81	11.016		2073.81	5.99006		2073.81	0.94847
2072.28	26.2123		2072.28	21.0434		2072.28	16.0653		2072.28	11.0571		2072.28	5.99503		2072.28	0.93649
2070.76	26.1562		2070.76	21.0263		2070.76	16.0382		2070.76	11.0087		2070.76	6.031		2070.76	1.0158
2069.24	26.1186		2069.24	20.9336		2069.24	16.0164		2069.24	11.0016		2069.24	5.99204		2069.24	0.93317
2067.71	26.1867		2067.71	21.0343		2067.71	15.9678		2067.71	11.0014		2067.71	6.03833		2067.71	0.96241
2066.19	26.1492		2066.19	20.9164		2066.19	16.0214		2066.19	11.0459		2066.19	5.96581		2066.19	0.92102
2064.67	26.0807		2064.67	21.0885		2064.67	16.0615		2064.67	11.0835		2064.67	6.06631		2064.67	0.91789
2063.14	26.037		2063.14	20.9412		2063.14	16.021		2063.14	10.9664		2063.14	6.0093		2063.14	0.96771
2061.62	26.1237		2061.62	20.9872		2061.62	16.0423		2061.62	11.004		2061.62	6.06071		2061.62	1.00868
2060.09	26.1421		2060.09	20.9913		2060.09	15.9695		2060.09	11.0657		2060.09	6.06565		2060.09	1.02317
2058.57	26.1232		2058.57	21.0498		2058.57	16.0741		2058.57	11.0724		2058.57	6.04222		2058.57	0.97593
2057.04	26.2099		2057.04	21.0538		2057.04	16.0175		2057.04	11.079		2057.04	6.04975		2057.04	0.99631
2055.52	26.1538		2055.52	21.0284		2055.52	16.0495		2055.52	11.0582		2055.52	6.07016		2055.52	1.0108
2053.99	26.2156		2053.99	21.1331		2053.99	16.0949		2053.99	10.9996		2053.99	6.05705		2053.99	1.06347
2052.46	26.2587		2052.46	21.0448		2052.46	16.041		2052.46	11.0646		2052.46	6.00786		2052.46	1.03976
2050.94	26.0849		2050.94	21.1369		2050.94	16.1213		2050.94	11.1022		2050.94	6.06951		2050.94	1.05423
2049.41	26.1467		2049.41	21.145		2049.41	16.1237		2049.41	11.0745		2049.41	6.03837		2049.41	1.04227
2047.88	26.2394		2047.88	21.0441		2047.88	16.0967		2047.88	11.1189		2047.88	6.06392		2047.88	0.98628
2046.35	26.2391		2046.35	21.0607		2046.35	16.0455		2046.35	11.0878		2046.35	6.06113		2046.35	1.05065
2044.83	26.2017		2044.83	21.1234		2044.83	16.1177		2044.83	11.1047		2044.83	6.11241		2044.83	0.97708
2043.3	26.0219		2043.3	21.0938		2043.3	16.0451		2043.3	11.0324		2043.3	6.03495		2043.3	1.02088
2041.77	26.0898		2041.77	21.1187		2041.77	16.1038		2041.77	11.0562		2041.77	6.0682		2041.77	1.00894
2040.24	26.2629		2040.24	21.1185		2040.24	16.0473		2040.24	11.104		2040.24	6.11431		2040.24	0.98528
2038.71	26.1945		2038.71	21.1602		2038.71	16.0632		2038.71	11.0935		2038.71	6.12437		2038.71	0.98801
2037.18	26.1077		2037.18	21.1055		2037.18	16.1112		2037.18	11.0487		2037.18	6.11385		2037.18	1.12851
2035.65	26.1446		2035.65	21.1429		2035.65	16.1002		2035.65	11.0554		2035.65	6.10076		2035.65	0.90848
2034.12	26.2371		2034.12	21.0129		2034.12	16.0358		2034.12	11.1819		2034.12	6.09797		2034.12	1.01378
2032.59	26.3234		2032.59	21.0504		2032.59	16.1239		2032.59	11.0823		2032.59	6.05918		2032.59	1.08095
2031.06	26.2057		2031.06	21.0627		2031.06	16.0835		2031.06	11.0787		2031.06	6.0821		2031.06	1.00458
2029.53	26.2425		2029.53	21.1127		2029.53	16.0699		2029.53	11.0614		2029.53	6.123		2029.53	1.0278
2028	26.1125		2028	21.0916		2028	16.0884		2028	11.1193		2028	6.09964		2028	1.03052
2026.46	26.2111		2026.46	21.0579		2026.46	16.016		2026.46	11.0712		2026.46	6.04548		2026.46	1.03323
2024.93	26.1429		2024.93	21.112		2024.93	16.0746		2024.93	11.1291		2024.93	6.09919		2024.93	0.99498
2023.4	26.2415		2023.4	21.0826		2023.4	16.0397		2023.4	11.1597		2023.4	6.12208		2023.4	1.00063
2021.87	26.1301		2021.87	21.0656		2021.87	16.0475		2021.87	11.1492		2021.87	6.07307		2021.87	0.9975
2020.33	26.1854		2020.33	21.103		2020.33	16.0339		2020.33	11.1524		2020.33	6.13959		2020.33	1.06164
2018.8	26.1543		2018.8	21.0861		2018.8	16.0577		2018.8	11.1009		2018.8	6.09573		2018.8	1.02926
2017.27	26.1726		2017.27	21.0775		2017.27	16.1136		2017.27	11.1041		2017.27	6.12116		2017.27	1.02612
2015.73	26.3452		2015.73	21.1608		2015.73	16.0199		2015.73	10.9842		2015.73	6.11581		2015.73	1.06391
2014.2	26.2092		2014.2	21.1647		2014.2	16.1131		2014.2	10.9601		2014.2	6.13866		2014.2	1.02278
2012.66	26.2891		2012.66	20.985		2012.66	16.1262		2012.66	11.1307		2012.66	6.06151		2012.66	0.98459
2011.13	26.3443		2011.13	21.11		2011.13	16.0913		2011.13	11.0998		2011.13	6.07667		2011.13	1.08371
2009.59	26.1714		2009.59	21.1139		2009.59	16.0964		2009.59	11.1337		2009.59	6.15847		2009.59	0.96083
2008.06	26.1897		2008.06	21.1429		2008.06	15.9975		2008.06	11.0959		2008.06	6.09417		2008.06	1.00151
2006.52	26.1525		2006.52	21.0634		2006.52	16.0507		2006.52	11.0274		2006.52	6.13494		2006.52	1.04801
2004.99	26.183		2004.99	21.0841		2004.99	16.0904		2004.99	11.0135		2004.99	6.06555		2004.99	1.01569
2003.45	26.2198		2003.45	21.088		2003.45	16.0982		2003.45	11.1054		2003.45	6.09606		2003.45	1.09427
2001.91	26.2626		2001.91	21.1003		2001.91	16.1006		2001.91	11.0984		2001.91	6.08815		2001.91	0.99194
2000.38	26.1577		2000.38	21.0501		2000.38	16.1244		2000.38	11.0948		2000.38	6.09561		2000.38	1.0034
1998.84	26.3237		1998.84	21.1123		1998.84	16.0602		1998.84	11.1082		1998.84	6.07491		1998.84	1.04111
1997.3	26.2803		1997.3	21.0871		1997.3	16.0653		1997.3	11.0807		1997.3	6.17449		1997.3	1.00299
1995.76	26.1508		1995.76	21.0578		1995.76	16.1024		1995.76	11.0396		1995.76	6.13587		1995.76	1.04651
1994.22	26.1383		1994.22	21.0784		1994.22	16.0516		1994.22	11.1041		1994.22	6.09983		1994.22	1.01716
1992.68	26.1442		1992.68	21.1364		1992.68	16.1286		1992.68	11.0051		1992.68	6.12262		1992.68	1.04609
1991.14	26.2485		1991.14	21.0446		1991.14	16.0911		1991.14	11.09		1991.14	6.10705		1991.14	0.99635
1989.61	26.2852		1989.61	21.0735		1989.61	16.0802		1989.61	11.117		1989.61	6.11961		1989.61	1.06896
1988.07	26.2418		1988.07	21.1149		1988.07	16.0667		1988.07	11.0862		1988.07	6.1066		1988.07	1.09204
1986.53	26.2539		1986.53	21.1729		1986.53	16.0771		1986.53	11.1302		1986.53	6.10637		1986.53	1.02194
1984.99	26.1553		1984.99	21.0479		1984.99	16.0477		1984.99	11.1198		1984.99	6.17512		1984.99	0.94314
1983.45	26.2042		1983.45	21.1641		1983.45	16.0873		1983.45	11.0549		1983.45	6.10592		1983.45	1.01861
1981.9	26.1548		1981.9	21.0558		1981.9	16.0446		1981.9	11.0853		1981.9	6.01632		1981.9	0.98931
1980.36	26.1607		1980.36	21.0307		1980.36	16.1055		1980.36	11.0477		1980.36	6.17696		1980.36	1.00365
1978.82	26.1851		1978.82	21.018		1978.82	16.0255		1978.82	11.0542		1978.82	6.10269		1978.82	1.07325
1977.28	26.1603		1977.28	21.1258		1977.28	16.1183		1977.28	10.969		1977.28	6.11267		1977.28	0.9509
1975.74	26.1969		1975.74	21.0757		1975.74	16.065		1975.74	11.1252		1975.74	6.10479		1975.74	0.96815
1974.2	26.0371		1974.2	21.0672		1974.2	16.0568		1974.2	11.0264		1974.2	6.11222		1974.2	1.05515
1972.65	26.3007		1972.65	21.0794		1972.65	16.0698		1972.65	11.0839		1972.65	6.08904		1972.65	1.05494
1971.11	26.1593		1971.11	21.0045		1971.11	16.051		1971.11	11.0973		1971.11	6.05567		1971.11	0.94431
1969.57	26.1223		1969.57	21.0582		1969.57	16.0959		1969.57	11.0563		1969.57	6.11918		1969.57	1.01383
1968.02	26.2692		1968.02	21.0912		1968.02	16.109		1968.02	11.0867		1968.02	6.05269		1968.02	0.98749
1966.48	26.2077		1966.48	21.0371		1966.48	16.061		1966.48	11.1136		1966.48	6.07031		1966.48	1.0018
1964.93	26.1216		1964.93	21.0451		1964.93	16.0555		1964.93	11.0896		1964.93	6.07519		1964.93	0.9987
1963.39	26.2929		1963.39	21.0657		1963.39	16.0632		1963.39	10.9638		1963.39	6.10299		1963.39	0.98398
1961.84	26.2069		1961.84	21.111		1961.84	16.0842		1961.84	11.0179		1961.84	6.02636		1961.84	0.98668
1960.3	26.225		1960.3	21.0984		1960.3	16.0124		1960.3	10.9838		1960.3	6.06434		1960.3	1.04451
1958.75	26.2615		1958.75	20.978		1958.75	16.0573		1958.75	11.0447		1958.75	6.07685		1958.75	0.93986
1957.21	26.3409		1957.21	21.0731		1957.21	16.0041		1957.21	11.0139		1957.21	6.10208		1957.21	1.01508
1955.66	26.3039		1955.66	21.1226		1955.66	16.0303		1955.66	11.0103		1955.66	6.08404		1955.66	1.02937
1954.11	26.2057		1954.11	20.9567		1954.11	16.0884		1954.11	10.9762		1954.11	6.11944		1954.11	0.96248
1952.57	26.1932		1952.57	21.089		1952.57	16.112		1952.57	11.1014		1952.57	6.09378		1952.57	0.9246
1951.02	26.1624		1951.02	21.1053		1951.02	16.0191		1951.02	11.0334		1951.02	6.12407		1951.02	1.02873
1949.47	26.1682		1949.47	21.0471		1949.47	16.0163		1949.47	10.9858		1949.47	6.01451		1949.47	0.93871
1947.92	26.1558		1947.92	21.0552		1947.92	16.0293		1947.92	11.0838		1947.92	6.0626		1947.92	1.07466
1946.38	26.2595		1946.38	21.0633		1946.38	16.1111		1946.38	10.9922		1946.38	6.03442		1946.38	0.94412
1944.83	26.1553		1944.83	20.9348		1944.83	15.9495		1944.83	10.9818		1944.83	6.1079		1944.83	0.93813
1943.28	26.1673		1943.28	21.1207		1943.28	15.9969		1943.28	11.0493		1943.28	6.01368		1943.28	0.91189
1941.73	26.1059		1941.73	21.0792		1941.73	16.0364		1941.73	11.0626		1941.73	6.02617		1941.73	0.98695
1940.18	26.1974		1940.18	21.0128		1940.18	16.0467		1940.18	11.0455		1940.18	6.10722		1940.18	0.95781
1938.63	26.2154		1938.63	21.0581		1938.63	16.0016		1938.63	11.0588		1938.63	6.01305		1938.63	0.93158
1937.08	26.0992		1937.08	21.0702		1937.08	16.0384		1937.08	11.0856		1937.08	6.07123		1937.08	0.94296
1935.53	26.0989		1935.53	20.9998		1935.53	16.0038		1935.53	11.0854		1935.53	6.01518		1935.53	0.95144
1933.98	26.1964		1933.98	21.045		1933.98	16.0221		1933.98	10.977		1933.98	6.04542		1933.98	0.94257
1932.43	26.2327		1932.43	21.0778		1932.43	16.0325		1932.43	11.0714		1932.43	6.04774		1932.43	0.89613
1930.88	26.2081		1930.88	21.057		1930.88	16.0085		1930.88	10.9462		1930.88	6.09064		1930.88	0.91328
1929.32	26.1834		1929.32	20.9866		1929.32	16.0532		1929.32	10.9257		1929.32	5.99913		1929.32	0.91888
1927.77	26.2503		1927.77	21.0153		1927.77	16.0371		1927.77	11.0032		1927.77	5.97357		1927.77	0.94469
1926.22	26.2134		1926.22	21.1058		1926.22	16.0422		1926.22	10.9895		1926.22	5.98858		1926.22	0.92139
1924.67	26.1827		1924.67	21.0107		1924.67	15.9945		1924.67	11.0096		1924.67	6.01879		1924.67	0.94141
1923.12	26.0971		1923.12	20.9858		1923.12	15.9943		1923.12	11.0499		1923.12	6.02365		1923.12	0.95277
1921.56	26.17		1921.56	20.9773		1921.56	16.0363		1921.56	10.9484		1921.56	6.0361		1921.56	0.99299
1920.01	26.0906		1920.01	20.9647		1920.01	15.9728		1920.01	10.9752		1920.01	5.9903		1920.01	1.00144
1918.46	26.1696		1918.46	21.0429		1918.46	16.0068		1918.46	11.0526		1918.46	5.96478		1918.46	0.92621
1916.9	26.078		1916.9	20.985		1916.9	15.9961		1916.9	10.995		1916.9	5.97217		1916.9	0.90583
1915.35	26.0899		1915.35	20.9477		1915.35	16.0539		1915.35	10.9206		1915.35	6.01501		1915.35	0.94602
1913.79	26.1627		1913.79	21.0257		1913.79	16.0009		1913.79	10.9306		1913.79	5.99708		1913.79	0.89969
1912.23	26.0225		1912.23	21.0008		1912.23	16.0587		1912.23	10.9742		1912.23	5.97664		1912.23	0.98311
1910.68	26.0588		1910.68	20.9512		1910.68	15.9663		1910.68	11.0144		1910.68	6.03462		1910.68	0.89644
1909.12	26.089		1909.12	21.0498		1909.12	16.0424		1909.12	11.0412		1909.12	6.03188		1909.12	0.99424
1907.57	26.0706		1907.57	20.9879		1907.57	16.0265		1907.57	11.0073		1907.57	5.98362		1907.57	0.93065
1906.01	26.0947		1906.01	21		1906.01	15.9894		1906.01	11.0239		1906.01	6.04409		1906.01	0.94774
1904.46	26.1674		1904.46	21.0121		1904.46	16.0313		1904.46	10.9732		1904.46	5.98322		1904.46	0.8957
1902.9	26.0942		1902.9	21.0448		1902.9	15.9916		1902.9	10.9528		1902.9	6.04366		1902.9	0.99054
1901.34	26.0089		1901.34	21.0446		1901.34	16.0545		1901.34	10.956		1901.34	6.00555		1901.34	0.93852
1899.78	26.0938		1899.78	20.9128		1899.78	16.0201		1899.78	11.0197		1899.78	6.00535		1899.78	1.0218
1898.22	26.13		1898.22	20.9579		1898.22	16.0094		1898.22	11.0363		1898.22	6.06575		1898.22	0.98418
1896.67	26.2269		1896.67	21.0234		1896.67	16.0355		1896.67	10.9083		1896.67	5.98726		1896.67	0.96096
1895.11	26.172		1895.11	21.0356		1895.11	15.9932		1895.11	10.9821		1895.11	6.01483		1895.11	0.92624
1893.55	26.1232		1893.55	21.0559		1893.55	16.0377		1893.55	10.9953		1893.55	6.002		1893.55	0.90592
1891.99	26.1351		1891.99	21.0598		1891.99	16.0112		1891.99	11.0288		1891.99	6.01189		1891.99	0.93736
1890.43	26.0499		1890.43	20.9322		1890.43	16.0031		1890.43	11.0487		1890.43	6.02429		1890.43	0.94292
1888.87	26.2803		1888.87	21.0429		1888.87	15.932		1888.87	10.9981		1888.87	5.99381		1888.87	1.01458
1887.31	26.1587		1887.31	20.9852		1887.31	16.0106		1887.31	11.0248		1887.31	6.05413		1887.31	0.94541
1885.75	26.2434		1885.75	20.9563		1885.75	15.9973		1885.75	11.0481		1885.75	6.07409		1885.75	0.98256
1884.19	26.0976		1884.19	20.9561		1884.19	16.0731		1884.19	11.0008		1884.19	6.04362		1884.19	0.90481
1882.62	26.2065		1882.62	20.9846		1882.62	16.086		1882.62	11.0543		1882.62	6.0434		1882.62	0.93908
1881.06	26.1274		1881.06	20.9475		1881.06	15.9967		1881.06	10.9903		1881.06	5.98523		1881.06	0.99631
1879.5	26.0666		1879.5	21.0252		1879.5	15.9466		1879.5	11.0606		1879.5	6.11603		1879.5	0.92721
1877.94	26.1088		1877.94	21.0865		1877.94	16.0251		1877.94	10.9832		1877.94	6.06039		1877.94	0.92128
1876.38	26.1813		1876.38	20.9879		1876.38	16.0563		1876.38	10.973		1876.38	6.00981		1876.38	0.97561
1874.81	26.1507		1874.81	20.9877		1874.81	16.0587		1874.81	10.9929		1874.81	6.0524		1874.81	0.96107
1873.25	26.1202		1873.25	21.0695		1873.25	16.0402		1873.25	10.996		1873.25	6.02701		1873.25	0.96087
1871.69	26.1745		1871.69	20.9709		1871.69	16.0085		1871.69	11.0126		1871.69	6.05197		1871.69	0.91192
1870.12	26.1137		1870.12	21.069		1870.12	15.9271		1870.12	11.0258		1870.12	6.00646		1870.12	0.906
1868.56	26.1619		1868.56	20.991		1868.56	15.9793		1868.56	11.0088		1868.56	6.02135		1868.56	0.97461
1867	26.0891		1867	21.0194		1867	15.9896		1867	10.945		1867	5.99347		1867	0.99734
1865.43	26.1433		1865.43	21.0561		1865.43	16.0234		1865.43	11.0319		1865.43	5.99075		1865.43	0.88825
1863.87	26.0947		1863.87	21.0518		1863.87	16.0206		1863.87	11.0785		1863.87	6.04837		1863.87	1.00266
1862.3	26.2154		1862.3	20.9861		1862.3	16.0125		1862.3	11.0214		1862.3	6.04565		1862.3	0.95949
1860.73	26.1547		1860.73	21.125		1860.73	16.0725		1860.73	11.0045		1860.73	6.05297		1860.73	0.96788
1859.17	26.1665		1859.17	21.0102		1859.17	15.999		1859.17	10.9674		1859.17	6.04019		1859.17	0.95909
1857.6	26.0031		1857.6	20.9855		1857.6	16.0302		1857.6	11.0676		1857.6	5.96964		1857.6	0.9818
1856.04	26.1117		1856.04	21.0139		1856.04	15.9934		1856.04	10.9871		1856.04	6.01716		1856.04	0.98159
1854.47	26.1416		1854.47	21.0341		1854.47	15.9775		1854.47	10.9902		1854.47	6.02699		1854.47	0.9442
1852.9	26.0931		1852.9	21.0257		1852.9	16.0269		1852.9	10.9466		1852.9	6.02427		1852.9	0.96975
1851.33	26.1291		1851.33	21.0541		1851.33	16.0528		1851.33	11.0099		1851.33	6.09434		1851.33	0.98385
1849.77	26.0745		1849.77	21.0457		1849.77	16.05		1849.77	11.0933		1849.77	6.10917		1849.77	0.98365
1848.2	26.2312		1848.2	21.1027		1848.2	15.9924		1848.2	11.0897		1848.2	6.01862		1848.2	0.96915
1846.63	26.0982		1846.63	21.0739		1846.63	16.0078		1846.63	11.046		1846.63	6.00838		1846.63	1.01468
1845.06	26.1643		1845.06	21.0206		1845.06	15.9789		1845.06	11.0124		1845.06	5.95551		1845.06	0.88874
1843.49	26.1581		1843.49	20.9592		1843.49	15.963		1843.49	11.0055		1843.49	6.03805		1843.49	0.93427
1841.92	26.1337		1841.92	21.0243		1841.92	16.0202		1841.92	11.0387		1841.92	5.9501		1841.92	0.92265
1840.35	26.1154		1840.35	20.9792		1840.35	16.0383		1840.35	11.0418		1840.35	6.0677		1840.35	0.9196
1838.78	26.1694		1838.78	21.0769		1838.78	16.0016		1838.78	10.9682		1838.78	5.9898		1838.78	0.9651
1837.21	26.2535		1837.21	20.9665		1837.21	16.09		1837.21	10.948		1837.21	6.06977		1837.21	0.97346
1835.64	26.2473		1835.64	21.0438		1835.64	16.035		1835.64	10.9611		1835.64	6.05953		1835.64	0.99039
1834.07	25.994		1834.07	21.0395		1834.07	15.9723		1834.07	10.9309		1834.07	6.01674		1834.07	0.91028
1832.5	26.1745		1832.5	20.9945		1832.5	15.9981		1832.5	11.0608		1832.5	6.00651		1832.5	0.9586
1830.92	26.0177		1830.92	20.9983		1830.92	15.9745		1830.92	11.0339		1830.92	5.98127		1830.92	0.98122
1829.35	26.0476		1829.35	21.0878		1829.35	15.9821		1829.35	11.0337		1829.35	6.03112		1829.35	0.97246
1827.78	26.1316		1827.78	21.0387		1827.78	15.9845		1827.78	10.9668		1827.78	6.0134		1827.78	0.96371
1826.21	26.1735		1826.21	21.0018		1826.21	16.0129		1826.21	11.0132		1826.21	6.0382		1826.21	0.87514
1824.63	26.2154		1824.63	20.9649		1824.63	15.9815		1824.63	11.0064		1824.63	6.02298		1824.63	0.99751
1823.06	26.1369		1823.06	20.981		1823.06	16.0437		1823.06	10.9728		1823.06	6.02527		1823.06	0.88618
1821.48	26.0705		1821.48	20.9808		1821.48	15.929		1821.48	10.996		1821.48	5.97006		1821.48	0.92873
1819.91	26.0583		1819.91	21.062		1819.91	15.9236		1819.91	10.9458		1819.91	6.08234		1819.91	0.97411
1818.34	26.0521		1818.34	20.9235		1818.34	15.9365		1818.34	10.9556		1818.34	6.01964		1818.34	0.94543
1816.76	26.0999		1816.76	21.0046		1816.76	15.9363		1816.76	10.9787		1816.76	6.05441		1816.76	0.96801
1815.19	26.0456		1815.19	20.9516		1815.19	15.9517		1815.19	11.0051		1815.19	6.02422		1815.19	0.94219
1813.61	26.0694		1813.61	21.0123		1813.61	16.0009		1813.61	10.955		1813.61	6.00403		1813.61	0.96477
1812.04	26.1113		1812.04	21.0406		1812.04	15.9955		1812.04	11.0114		1812.04	6.02879		1812.04	0.90766
1810.46	26.111		1810.46	20.9835		1810.46	15.9849		1810.46	11.0311		1810.46	5.98364		1810.46	0.97006
1808.88	26.1468		1808.88	21.0645		1808.88	16.0158		1808.88	11.0375		1808.88	6.05333		1808.88	0.9272
1807.31	26.1706		1807.31	21.0115		1807.31	15.9533		1807.31	11.0207		1807.31	6.05061		1807.31	0.95828
1805.73	26.0863		1805.73	21.0032		1805.73	16.031		1805.73	11.0471		1805.73	6.02295		1805.73	0.91829
1804.15	26.1041		1804.15	21.0436		1804.15	16.0074		1804.15	10.9572		1804.15	6.06265		1804.15	0.95505
1802.57	26.2839		1802.57	21.019		1802.57	15.9735		1802.57	10.9968		1802.57	6.03749		1802.57	0.94917
1801	26.1456		1801	21.0188		1801	15.9914		1801	11.0431		1801	5.98242		1801	0.95749
1799.42	26.2054		1799.42	21.0389		1799.42	15.9964		1799.42	10.93		1799.42	6.00964		1799.42	0.98002
1797.84	26.1632		1797.84	21.0549		1797.84	16.0559		1797.84	11.056		1797.84	6.03436		1797.84	0.96846
1796.26	26.1929		1796.26	21.01		1796.26	16.0012		1796.26	10.996		1796.26	6.05408		1796.26	0.95122
1794.68	26.2466		1794.68	21.0382		1794.68	16.0114		1794.68	11.0423		1794.68	6.03144		1794.68	0.98225
1793.1	26.1145		1793.1	21.0542		1793.1	16.0449		1793.1	11.052		1793.1	5.97643		1793.1	1.00476
1791.52	26.1442		1791.52	21.0621		1791.52	16.0654		1791.52	11.0916		1791.52	6.07584		1791.52	1.03009
1789.94	26.2039		1789.94	21.07		1789.94	15.9796		1789.94	11.0383		1789.94	6.01337		1789.94	0.95328
1788.36	26.1797		1788.36	21.013		1788.36	16.0857		1788.36	11.0646		1788.36	6.03308		1788.36	1.00697
1786.78	26.2393		1786.78	21.0736		1786.78	16.0233		1786.78	11.1174		1786.78	6.06771		1786.78	1.06065
1785.2	26.2271		1785.2	21.1382		1785.2	16.0386		1785.2	10.9946		1785.2	6.08739		1785.2	0.99805
1783.62	26.2508		1783.62	21.1056		1783.62	16.0332		1783.62	11.0706		1783.62	6.05483		1783.62	1.06871
1782.03	26.2565		1782.03	21.1985		1782.03	16.0666		1782.03	11.1764		1782.03	6.07451		1782.03	0.98914
1780.45	26.2443		1780.45	21.097		1780.45	16.0587		1780.45	11.0701		1780.45	6.07677		1780.45	1.03994
1778.87	26.3158		1778.87	21.1777		1778.87	16.1438		1778.87	11.0368		1778.87	6.10639		1778.87	1.08788
1777.29	26.2737		1777.29	21.0237		1777.29	16.1074		1777.29	11.0565		1777.29	6.14344		1777.29	1.12448
1775.7	26.2315		1775.7	21.153		1775.7	16.1072		1775.7	11.0993		1775.7	6.0612		1775.7	1.11292
1774.12	26.2731		1774.12	21.1608		1774.12	16.0914		1774.12	11.1586		1774.12	6.08582		1774.12	1.07305
1772.54	26.2669		1772.54	21.0999		1772.54	16.1325		1772.54	11.0293		1772.54	6.10796		1772.54	1.05585
1770.95	26.3742		1770.95	21.132		1770.95	16.0935		1770.95	11.0986		1770.95	6.15492		1770.95	1.00752
1769.37	26.2664		1769.37	21.1237		1769.37	16.0933		1769.37	11.0984		1769.37	6.10998		1769.37	1.05824
1767.78	26.1825		1767.78	21.172		1767.78	16.013		1767.78	11.0717		1767.78	6.13458		1767.78	1.06085
1766.2	26.2897		1766.2	21.2566		1766.2	16.1652		1766.2	11.1773		1766.2	6.16413		1766.2	1.02386
1764.61	26.385		1764.61	21.1594		1764.61	16.1185		1764.61	11.1407		1764.61	6.06463		1764.61	1.06607
1763.02	26.3131		1763.02	21.1955		1763.02	16.1518		1763.02	11.157		1763.02	6.11403		1763.02	1.06302
1761.44	26.3426		1761.44	21.058		1761.44	16.1025		1761.44	11.1997		1761.44	6.20062		1761.44	1.16739
1759.85	26.3722		1759.85	21.1143		1759.85	16.172		1759.85	11.2027		1759.85	6.19045		1759.85	1.14171
1758.26	26.354		1758.26	21.2957		1758.26	16.1614		1758.26	11.2256		1758.26	6.16789		1758.26	1.15278
1756.68	26.4014		1756.68	21.1501		1756.68	16.1818		1756.68	11.2155		1756.68	6.22467		1756.68	1.10451
1755.09	26.27		1755.09	21.279		1755.09	16.2125		1755.09	11.2879		1755.09	6.25911		1755.09	1.10429
1753.5	26.5141		1753.5	21.073		1753.5	16.153		1753.5	11.2282		1753.5	6.1969		1753.5	1.13512
1751.91	26.3112		1751.91	21.2543		1751.91	16.2404		1751.91	11.1718		1751.91	6.22638		1751.91	1.1857
1750.32	26.5075		1750.32	21.3145		1750.32	16.2015		1750.32	11.1881		1750.32	6.22118		1750.32	1.19674
1748.74	26.3762		1748.74	21.1973		1748.74	16.1729		1748.74	11.267		1748.74	6.1813		1748.74	1.16828
1747.15	26.4474		1747.15	21.3341		1747.15	16.2706		1747.15	11.2239		1747.15	6.17858		1747.15	1.19625
1745.56	26.3756		1745.56	21.3056		1745.56	16.2677		1745.56	11.2104		1745.56	6.2625		1745.56	1.15087
1743.97	26.4825		1743.97	21.2489		1743.97	16.2443		1743.97	11.2431		1743.97	6.31669		1743.97	1.17319
1742.38	26.375		1742.38	21.4098		1742.38	16.2363		1742.38	11.355		1742.38	6.17785		1742.38	1.20679
1740.79	26.4104		1740.79	21.3773		1740.79	16.2489		1740.79	11.2888		1740.79	6.21966		1740.79	1.18398
1739.2	26.428		1739.2	21.4253		1739.2	16.2486		1739.2	11.2424		1739.2	6.26888		1739.2	1.2091
1737.61	26.3801		1737.61	21.4009		1737.61	16.2818		1737.61	11.308		1737.61	6.2884		1737.61	1.14123
1736.01	26.5404		1736.01	21.3281		1736.01	16.2044		1736.01	11.3275		1736.01	6.23621		1736.01	1.21142
1734.42	26.5936		1734.42	21.348		1734.42	16.2813		1734.42	11.2383		1734.42	6.22112		1734.42	1.10132
1732.83	26.403		1732.83	21.396		1732.83	16.2502		1732.83	11.2808		1732.83	6.28513		1732.83	1.14052
1731.24	26.4384		1731.24	21.3555		1731.24	16.2345		1731.24	11.2345		1731.24	6.22062		1731.24	1.10931
1729.64	26.5213		1729.64	21.2748		1729.64	16.1777		1729.64	11.1519		1729.64	6.23519		1729.64	1.18508
1728.05	26.4319		1728.05	21.2343		1728.05	16.1851		1728.05	11.2965		1728.05	6.24481		1728.05	1.17358
1726.46	26.4316		1726.46	21.2662		1726.46	16.2234		1726.46	11.2271		1726.46	6.24949		1726.46	1.19303
1724.86	26.3838		1724.86	21.2941		1724.86	16.1692		1724.86	11.2236		1724.86	6.22454		1724.86	1.11964
1723.27	26.4488		1723.27	21.2335		1723.27	16.2435		1723.27	11.2168		1723.27	6.24157		1723.27	1.08847
1721.67	26.3891		1721.67	21.2373		1721.67	16.1764		1721.67	11.233		1721.67	6.19936		1721.67	1.18667
1720.08	26.3889		1720.08	21.1687		1720.08	16.1351		1720.08	11.3116		1720.08	6.23365		1720.08	1.21454
1718.48	26.4776		1718.48	21.2408		1718.48	16.1837		1718.48	11.3343		1718.48	6.25313		1718.48	1.20023
1716.89	26.4773		1716.89	21.1642		1716.89	16.2245		1716.89	11.3209		1716.89	6.24547		1716.89	1.15502
1715.29	26.4058		1715.29	21.2323		1715.29	16.2037		1715.29	11.1958		1715.29	6.22056		1715.29	1.14354
1713.7	26.5122		1713.7	21.2721		1713.7	16.1496		1713.7	11.1561		1713.7	6.25975		1713.7	1.24443
1712.1	26.5178		1712.1	21.2799		1712.1	16.2032		1712.1	11.3267		1712.1	6.24223		1712.1	1.08128
1710.5	26.3871		1710.5	21.1874		1710.5	16.2773		1710.5	11.1589		1710.5	6.30851		1710.5	1.21303
1708.91	26.4402		1708.91	21.1791		1708.91	16.1591		1708.91	11.1357		1708.91	6.29592		1708.91	1.21839
1707.31	26.3925		1707.31	21.2791		1707.31	16.1691		1707.31	11.1847		1707.31	6.25624		1707.31	1.11148
1705.71	26.3863		1705.71	21.2508		1705.71	16.2253		1705.71	11.342		1705.71	6.20426		1705.71	1.22631
1704.11	26.3623		1704.11	21.1824		1704.11	16.1968		1704.11	11.3122		1704.11	6.30743		1704.11	1.10541
1702.52	26.5219		1702.52	21.1541		1702.52	16.194		1702.52	11.302		1702.52	6.26531		1702.52	1.13604
1700.92	26.5393		1700.92	21.258		1700.92	16.1886		1700.92	11.328		1700.92	6.35119		1700.92	1.21713
1699.32	26.3614		1699.32	21.3459		1699.32	16.2627		1699.32	11.295		1699.32	6.23033		1699.32	1.22809
1697.72	26.4795		1697.72	21.2975		1697.72	16.2035		1697.72	11.3602		1697.72	6.32356		1697.72	1.1942
1696.12	26.5739		1696.12	21.2892		1696.12	16.1521		1696.12	11.1994		1696.12	6.2864		1696.12	1.18554
1694.52	26.4552		1694.52	21.297		1694.52	16.1749		1694.52	11.3072		1694.52	6.22465		1694.52	1.16288
1692.92	26.449		1692.92	21.3007		1692.92	16.1925		1692.92	11.3004		1692.92	6.29078		1692.92	1.17665
1691.32	26.431		1691.32	21.2244		1691.32	16.223		1691.32	11.2707		1691.32	6.26347		1691.32	1.30245
1689.71	26.478		1689.71	21.2322		1689.71	16.1793		1689.71	11.2737		1689.71	6.31236		1689.71	1.23217
1688.12	26.3713		1688.12	21.2999		1688.12	16.2199		1688.12	11.2931		1688.12	6.30472		1688.12	1.17311
1686.51	26.5719		1686.51	21.3756		1686.51	16.3117		1686.51	11.3026		1686.51	6.28971		1686.51	1.24005
1684.91	26.3943		1684.91	21.3993		1684.91	16.2782		1684.91	11.3318		1684.91	6.314		1684.91	1.25659
1683.31	26.4		1683.31	21.367		1683.31	16.3342		1683.31	11.397		1683.31	6.31127		1683.31	1.21995
1681.71	26.4292		1681.71	21.4267		1681.71	16.2112		1681.71	11.3869		1681.71	6.33801		1681.71	1.30642
1680.1	26.488		1680.1	21.3026		1680.1	16.2876		1680.1	11.3081		1680.1	6.36227		1680.1	1.28098
1678.5	26.6116		1678.5	21.3582		1678.5	16.244		1678.5	11.3013		1678.5	6.36199		1678.5	1.27512
1676.89	26.7529		1676.89	21.4098		1676.89	16.2999		1676.89	11.3697		1676.89	6.34699		1676.89	1.20776
1675.29	26.6345		1675.29	21.3656		1675.29	16.3022		1675.29	11.3628		1675.29	6.40558		1675.29	1.3808
1673.69	26.528		1673.69	21.4691		1673.69	16.3708		1673.69	11.3266		1673.69	6.38322		1673.69	1.34419
1672.08	26.6869		1672.08	21.3611		1672.08	16.2786		1672.08	11.4341		1672.08	6.4761		1672.08	1.31876
1670.48	26.663		1670.48	21.3169		1670.48	16.3167		1670.48	11.4992		1670.48	6.36793		1670.48	1.36598
1668.87	26.5801		1668.87	21.4563		1668.87	16.3343		1668.87	11.5054		1668.87	6.38235		1668.87	1.35452
1667.27	26.6446		1667.27	21.4161		1667.27	16.2957		1667.27	11.43		1667.27	6.36982		1667.27	1.48268
1665.66	26.6502		1665.66	21.5035		1665.66	16.2929		1665.66	11.4329		1665.66	6.49203		1665.66	1.42375
1664.05	26.6675		1664.05	21.3956		1664.05	16.4022		1664.05	11.4522		1664.05	6.47947		1664.05	1.48207
1662.45	26.6436		1662.45	21.5707		1662.45	16.2745		1662.45	11.4454		1662.45	6.56488		1662.45	1.3534
1660.84	26.6315		1660.84	21.5225		1660.84	16.338		1660.84	11.5299		1660.84	6.48865		1660.84	1.40334
1659.23	26.7195		1659.23	21.566		1659.23	16.3861		1659.23	11.5002		1659.23	6.54954		1659.23	1.48115
1657.62	26.6779		1657.62	21.486		1657.62	16.4113		1657.62	11.5195		1657.62	6.5174		1657.62	1.43901
1656.02	26.7188		1656.02	21.5375		1656.02	16.3117		1656.02	11.4409		1656.02	6.48038		1656.02	1.51399
1654.41	26.6419		1654.41	21.5372		1654.41	16.4896		1654.41	11.6264		1654.41	6.66355		1654.41	1.44956
1652.8	26.7887		1652.8	21.509		1652.8	16.4384		1652.8	11.613		1652.8	6.64853		1652.8	1.53287
1651.19	26.7589		1651.19	21.5962		1651.19	16.5094		1651.19	11.6551		1651.19	6.72155		1651.19	1.58271
1649.58	26.8761		1649.58	21.6476		1649.58	16.5981		1649.58	11.7036		1649.58	6.78476		1649.58	1.59352
1647.97	27.0169		1647.97	21.6473		1647.97	16.5571		1647.97	11.7423		1647.97	6.65973		1647.97	1.73524
1646.36	26.7872		1646.36	21.822		1646.36	16.5161		1646.36	11.8038		1646.36	6.69848		1646.36	1.72095
1644.75	26.8985		1644.75	21.7103		1644.75	16.5844		1644.75	11.8685		1644.75	6.72012		1644.75	1.75401
1643.14	27.0038		1643.14	21.7934		1643.14	16.6095		1643.14	11.7607		1643.14	6.79549		1643.14	1.83158
1641.53	27.1738		1641.53	21.7414		1641.53	16.6651		1641.53	11.9556		1641.53	6.87327		1641.53	1.90912
1639.92	27.1557		1639.92	21.8245		1639.92	16.774		1639.92	11.978		1639.92	6.96812		1639.92	1.99498
1638.3	27.1024		1638.3	21.8479		1638.3	16.733		1638.3	12.0199		1638.3	6.92864		1638.3	2.0808
1636.69	27.3604		1636.69	21.9071		1636.69	16.7555		1636.69	12.0455		1636.69	7.0332		1636.69	2.24168
1635.08	27.3481		1635.08	22.1411		1635.08	16.8212		1635.08	12.1621		1635.08	7.14747		1635.08	2.35522
1633.47	27.5883		1633.47	22.2161		1633.47	16.9808		1633.47	12.2884		1633.47	7.20314		1633.47	2.51042
1631.85	27.5936		1631.85	22.1879		1631.85	16.9931		1631.85	12.3887		1631.85	7.2661		1631.85	2.77117
1630.24	27.7573		1630.24	22.4931		1630.24	17.2059		1630.24	12.8333		1630.24	7.50463		1630.24	3.03459
1628.63	27.9914		1628.63	22.6593		1628.63	17.274		1628.63	12.8652		1628.63	7.64309		1628.63	3.47572
1627.01	28.3954		1627.01	22.7857		1627.01	17.4435		1627.01	13.0757		1627.01	7.86194		1627.01	4.02499
1625.4	28.7464		1625.4	23.1025		1625.4	17.6586		1625.4	13.5167		1625.4	8.1465		1625.4	4.20467
1623.78	29.1677		1623.78	23.4152		1623.78	17.8737		1623.78	14.0029		1623.78	8.34566		1623.78	4.32319
1622.17	29.4774		1622.17	23.6683		1622.17	18.1393		1622.17	14.0151		1622.17	8.55936		1622.17	4.46387
1620.55	29.7226		1620.55	23.6993		1620.55	18.1539		1620.55	14.3485		1620.55	8.62195		1620.55	4.16042
1618.94	30.0204		1618.94	23.9205		1618.94	18.3738		1618.94	14.2892		1618.94	8.91829		1618.94	4.1762
1617.32	30.2068		1617.32	23.8959		1617.32	18.3249		1617.32	14.1942		1617.32	9.00269		1617.32	4.18088
1615.71	30.1295		1615.71	24.0536		1615.71	18.3597		1615.71	14.3004		1615.71	9.08949		1615.71	4.26045
1614.09	30.1578		1614.09	24.1676		1614.09	18.3767		1614.09	14.3416		1614.09	9.19815		1614.09	4.3067
1612.47	30.4318		1612.47	24.1193		1612.47	18.4646		1612.47	14.4704		1612.47	9.15591		1612.47	4.44443
1610.85	30.3136		1610.85	24.154		1610.85	18.6133		1610.85	14.6186		1610.85	9.37399		1610.85	4.59042
1609.23	30.4529		1609.23	24.462		1609.23	18.7518		1609.23	14.7375		1609.23	9.51172		1609.23	4.91095
1607.62	30.7969		1607.62	24.5442		1607.62	18.8928		1607.62	14.9568		1607.62	9.55211		1607.62	5.16485
1606	31.2987		1606	24.9429		1606	19.1071		1606	15.1339		1606	10.018		1606	5.59316
1604.38	31.4552		1604.38	25.1595		1604.38	19.3895		1604.38	15.6413		1604.38	10.3694		1604.38	6.01022
1602.76	31.8455		1602.76	25.7281		1602.76	19.7858		1602.76	16.0157		1602.76	10.7206		1602.76	6.7594
1601.14	32.3994		1601.14	26.1461		1601.14	20.2122		1601.14	16.6651		1601.14	10.9988		1601.14	7.48334
1599.52	32.9471		1599.52	26.8092		1599.52	20.7901		1599.52	17.353		1599.52	11.6559		1599.52	8.3094
1597.9	34.0847		1597.9	27.4166		1597.9	21.4057		1597.9	18.2478		1597.9	12.3661		1597.9	9.58066
1596.28	35.1926		1596.28	28.4506		1596.28	22.2207		1596.28	19.2942		1596.28	13.2678		1596.28	10.9427
1594.66	36.6679		1594.66	29.583		1594.66	23.1642		1594.66	20.4728		1594.66	14.1303		1594.66	12.8353
1593.04	38.0726		1593.04	31.2325		1593.04	24.6227		1593.04	21.7286		1593.04	15.5944		1593.04	14.7713
1591.42	40.6558		1591.42	32.6166		1591.42	26.2625		1591.42	24.2026		1591.42	17.2278		1591.42	17.5997
1589.79	43.2263		1589.79	35.0388		1589.79	28.3814		1589.79	26.9245		1589.79	19.2025		1589.79	20.7862
1588.17	47.2195		1588.17	38.1155		1588.17	31.1431		1588.17	30.0815		1588.17	21.5815		1588.17	24.1235
1586.55	51.5434		1586.55	42.0475		1586.55	34.4717		1586.55	33.7994		1586.55	24.5754		1586.55	27.44
1584.93	56.688		1584.93	46.1121		1584.93	38.0109		1584.93	38.2878		1584.93	28.0143		1584.93	30.8159
1583.3	62.1861		1583.3	50.1907		1583.3	42.1542		1583.3	42.4288		1583.3	30.8457		1583.3	31.9944
1581.68	68.0667		1581.68	54.5162		1581.68	45.5087		1581.68	45.7188		1581.68	33.276		1581.68	31.916
1580.06	71.6658		1580.06	58.3548		1580.06	47.8302		1580.06	46.922		1580.06	35.2691		1580.06	29.452
1578.43	73.0139		1578.43	60.2633		1578.43	48.3579		1578.43	46.5979		1578.43	35.9678		1578.43	26.3873
1576.81	72.9923		1576.81	61.1262		1576.81	46.256		1576.81	43.8087		1576.81	35.9541		1576.81	23.0671
1575.18	69.9007		1575.18	59.6749		1575.18	43.1694		1575.18	40.4947		1575.18	34.9523		1575.18	19.3014
1573.56	65.0574		1573.56	57.0577		1573.56	39.1138		1573.56	35.9209		1573.56	33.2634		1573.56	16.5662
1571.93	60.1288		1571.93	51.7622		1571.93	35.7075		1571.93	32.0166		1571.93	30.7789		1571.93	13.9949
1570.31	55.3653		1570.31	47.0243		1570.31	31.8266		1570.31	28.2976		1570.31	28.0752		1570.31	11.9817
1568.68	50.7376		1568.68	42.0954		1568.68	29.083		1568.68	25.615		1568.68	24.7507		1568.68	10.427
1567.05	46.8625		1567.05	38.0271		1567.05	26.7208		1567.05	23.3267		1567.05	21.9042		1567.05	8.95013
1565.43	43.6697		1565.43	35.0863		1565.43	25.0493		1565.43	21.2134		1565.43	19.4435		1565.43	7.94789
1563.8	40.8447		1563.8	32.7333		1563.8	23.7536		1563.8	19.6711		1563.8	17.5085		1563.8	6.86065
1562.17	38.5617		1562.17	30.6017		1562.17	22.4911		1562.17	18.6481		1562.17	15.8837		1562.17	6.50386
1560.54	36.6925		1560.54	29.3877		1560.54	21.4857		1560.54	17.5321		1560.54	14.5907		1560.54	5.77541
1558.91	35.3647		1558.91	28.1466		1558.91	20.8757		1558.91	16.6484		1558.91	13.3466		1558.91	5.25378
1557.29	34.1885		1557.29	27.2167		1557.29	20.3841		1557.29	16.2543		1557.29	12.4582		1557.29	4.8948
1555.66	33.286		1555.66	26.6018		1555.66	19.8248		1555.66	15.738		1555.66	11.6571		1555.66	4.61578
1554.03	32.1165		1554.03	26.0147		1554.03	19.3964		1554.03	15.0676		1554.03	11.0085		1554.03	4.28735
1552.4	31.633		1552.4	25.2785		1552.4	19.1593		1552.4	14.8092		1552.4	10.336		1552.4	3.79673
1550.77	31.1554		1550.77	24.7508		1550.77	18.8996		1550.77	14.2807		1550.77	10.0452		1550.77	3.77393
1549.14	30.5271		1549.14	24.6241		1549.14	18.527		1549.14	14.0322		1549.14	9.64355		1549.14	3.59989
1547.51	30.0326		1547.51	24.2696		1547.51	18.4057		1547.51	13.9317		1547.51	9.41576		1547.51	3.54414
1545.88	29.8284		1545.88	24.1902		1545.88	18.1715		1545.88	13.677		1545.88	9.06261		1545.88	3.37297
1544.24	29.5141		1544.24	23.7025		1544.24	17.9499		1544.24	13.6248		1544.24	8.8061		1544.24	3.21011
1542.61	29.3971		1542.61	23.5447		1542.61	17.9568		1542.61	13.2417		1542.61	8.55692		1542.61	3.18746
1540.98	28.9496		1540.98	23.4654		1540.98	17.7905		1540.98	13.2154		1540.98	8.385		1540.98	2.95602
1539.35	28.769		1539.35	23.2136		1539.35	17.6168		1539.35	13.1729		1539.35	8.33126		1539.35	2.88124
1537.71	28.6871		1537.71	23.1109		1537.71	17.4984		1537.71	13.0888		1537.71	8.20043		1537.71	2.94929
1536.08	28.3443		1536.08	23.0867		1536.08	17.4929		1536.08	12.9212		1536.08	8.13229		1536.08	2.79218
1534.45	28.5001		1534.45	22.9645		1534.45	17.4322		1534.45	12.8757		1534.45	7.95097		1534.45	2.78886
1532.81	28.3487		1532.81	22.8855		1532.81	17.3063		1532.81	12.7243		1532.81	7.91181		1532.81	2.66478
1531.18	28.1569		1531.18	22.7124		1531.18	17.3008		1531.18	12.6531		1531.18	7.76432		1531.18	2.52977
1529.55	28.0694		1529.55	22.6296		1529.55	17.2001		1529.55	12.6237		1529.55	7.73244		1529.55	2.57588
1527.91	28.0803		1527.91	22.5898		1527.91	17.2297		1527.91	12.5302		1527.91	7.638		1527.91	2.55066
1526.28	27.8307		1526.28	22.4914		1526.28	17.099		1526.28	12.5328		1526.28	7.52435		1526.28	2.53093
1524.64	27.8359		1524.64	22.483		1524.64	17.0359		1524.64	12.3977		1524.64	7.38428		1524.64	2.42074
1523.01	27.7196		1523.01	22.3454		1523.01	17.0831		1523.01	12.3138		1523.01	7.47518		1523.01	2.39556
1521.37	27.6091		1521.37	22.1962		1521.37	17.0176		1521.37	12.3614		1521.37	7.40252		1521.37	2.39232
1519.73	27.597		1519.73	22.2858		1519.73	17.0021		1519.73	12.3001		1519.73	7.34671		1519.73	2.35073
1518.1	27.4866		1518.1	22.2657		1518.1	16.9267		1518.1	12.2195		1518.1	7.27411		1518.1	2.23245
1516.46	27.5265		1516.46	22.1479		1516.46	16.8712		1516.46	12.3503		1516.46	7.31449		1516.46	2.18816
1514.82	27.3584		1514.82	22.2022		1514.82	16.9058		1514.82	12.0617		1514.82	7.22269		1514.82	2.17949
1513.18	27.2307		1513.18	22.0062		1513.18	16.8154		1513.18	12.2181		1513.18	7.24865		1513.18	2.08596
1511.54	27.184		1511.54	22.1778		1511.54	16.76		1511.54	12.1249		1511.54	7.10167		1511.54	2.11563
1509.91	27.2529		1509.91	22.0718		1509.91	16.8097		1509.91	12.1916		1509.91	7.14445		1509.91	2.05499
1508.27	27.1774		1508.27	22.0206		1508.27	16.7143		1508.27	12.0472		1508.27	7.06237		1508.27	1.96154
1506.63	27.2173		1506.63	22.0123		1506.63	16.7415		1506.63	12.0915		1506.63	6.99713		1506.63	2.05139
1504.99	27.2169		1504.99	21.9533		1504.99	16.7736		1504.99	11.9216		1504.99	7.06631		1504.99	2.05917
1503.35	27.3145		1503.35	22.0154		1503.35	16.7182		1503.35	11.982		1503.35	7.03708		1503.35	1.87009
1501.71	27.2563		1501.71	21.9837		1501.71	16.6804		1501.71	12.0135		1501.71	6.86873		1501.71	1.9189
1500.07	27.2386		1500.07	21.9365		1500.07	16.735		1500.07	11.962		1500.07	6.94029		1500.07	1.89663
1498.43	27.0766		1498.43	22.0258		1498.43	16.6872		1498.43	11.8977		1498.43	6.98545		1498.43	1.92629
1496.79	27.1396		1496.79	21.8264		1496.79	16.7318		1496.79	11.9196		1496.79	6.89633		1496.79	1.87671
1495.14	27.1276		1495.14	21.8689		1495.14	16.7514		1495.14	11.9607		1495.14	6.99181		1495.14	1.93094
1493.5	27.081		1493.5	21.8802		1493.5	16.6213		1493.5	11.9092		1493.5	6.8548		1493.5	1.86774
1491.86	27.0172		1491.86	21.9929		1491.86	16.6284		1491.86	11.8099		1491.86	6.86159		1491.86	1.72811
1490.22	27.0917		1490.22	21.9457		1490.22	16.6032		1490.22	11.8159		1490.22	6.90911		1490.22	1.75777
1488.57	27.0797		1488.57	21.805		1488.57	16.6003		1488.57	11.7804		1488.57	6.83687		1488.57	1.78197
1486.93	27.0332		1486.93	21.7422		1486.93	16.5452		1486.93	11.78		1486.93	6.76944		1486.93	1.71066
1485.29	26.86		1485.29	21.7886		1485.29	16.5324		1485.29	11.786		1485.29	6.74274		1485.29	1.67484
1483.64	26.8596		1483.64	21.6636		1483.64	16.4598		1483.64	11.7697		1483.64	6.82135		1483.64	1.70449
1482	26.7556		1482	21.5814		1482	16.4496		1482	11.712		1482	6.66543		1482	1.66596
1480.35	26.7495		1480.35	21.6707		1480.35	16.4418		1480.35	11.6702		1480.35	6.69618		1480.35	1.48569
1478.71	26.8009		1478.71	21.6392		1478.71	16.3792		1478.71	11.6634		1478.71	6.65278		1478.71	1.56441
1477.06	26.5935		1477.06	21.4948		1477.06	16.4287		1477.06	11.6281		1477.06	6.60221		1477.06	1.59406
1475.42	26.7714		1475.42	21.5606		1475.42	16.4483		1475.42	11.6787		1475.42	6.58753		1475.42	1.60735
1473.77	26.725		1473.77	21.5136		1473.77	16.4057		1473.77	11.5669		1473.77	6.55134		1473.77	1.56071
1472.12	26.5695		1472.12	21.49		1472.12	16.3806		1472.12	11.6238		1472.12	6.57252		1472.12	1.63391
1470.48	26.6611		1470.48	21.5169		1470.48	16.3032		1470.48	11.649		1470.48	6.61042		1470.48	1.61178
1468.83	26.6148		1468.83	21.4777		1468.83	16.4521		1468.83	11.6168		1468.83	6.55036		1468.83	1.48895
1467.18	26.6776		1467.18	21.5201		1467.18	16.3673		1467.18	11.6197		1467.18	6.57631		1467.18	1.54579
1465.54	26.6486		1465.54	21.4304		1465.54	16.3521		1465.54	11.6034		1465.54	6.54733		1465.54	1.48833
1463.89	26.6425		1463.89	21.5156		1463.89	16.3568		1463.89	11.5204		1463.89	6.5661		1463.89	1.54242
1462.24	26.6938		1462.24	21.4454		1462.24	16.3316		1462.24	11.5423		1462.24	6.59203		1462.24	1.53938
1460.59	26.5901		1460.59	21.4606		1460.59	16.304		1460.59	11.596		1460.59	6.53442		1460.59	1.58256
1458.94	26.452		1458.94	21.3981		1458.94	16.3534		1458.94	11.5099		1458.94	6.484		1458.94	1.43271
1457.29	26.664		1457.29	21.4522		1457.29	16.1769		1457.29	11.5159		1457.29	6.46699		1457.29	1.51123
1455.64	26.6063		1455.64	21.4364		1455.64	16.2858		1455.64	11.4838		1455.64	6.52869		1455.64	1.55167
1453.99	26.4397		1453.99	21.4167		1453.99	16.3005		1453.99	11.5597		1453.99	6.47829		1453.99	1.45626
1452.34	26.577		1452.34	21.4319		1452.34	16.3027		1452.34	11.534		1452.34	6.46845		1452.34	1.47497
1450.69	26.6168		1450.69	21.4859		1450.69	16.2677		1450.69	11.4829		1450.69	6.50151		1450.69	1.52082
1449.04	26.4731		1449.04	21.3421		1449.04	16.3864		1449.04	11.5334		1449.04	6.48451		1449.04	1.56123
1447.38	26.5072		1447.38	21.4155		1447.38	16.349		1447.38	11.4061		1447.38	6.52946		1447.38	1.56362
1445.73	26.6501		1445.73	21.5044		1445.73	16.3264		1445.73	11.5073		1445.73	6.41958		1445.73	1.48458
1444.08	26.5696		1444.08	21.4459		1444.08	16.3062		1444.08	11.5959		1444.08	6.47643		1444.08	1.449
1442.43	26.5635		1442.43	21.5076		1442.43	16.3456		1442.43	11.5257		1442.43	6.48803		1442.43	1.56806
1440.78	26.5231		1440.78	21.4143		1440.78	16.3924		1440.78	11.5444		1440.78	6.56388		1440.78	1.52162
1439.12	26.5743		1439.12	21.383		1439.12	16.3005		1439.12	11.5663		1439.12	6.51358		1439.12	1.59723
1437.47	26.6713		1437.47	21.3711		1437.47	16.2358		1437.47	11.4899		1437.47	6.43474		1437.47	1.53454
1435.81	26.5565		1435.81	21.5102		1435.81	16.2529		1435.81	11.4801		1435.81	6.49391		1435.81	1.61824
1434.16	26.5505		1434.16	21.3628		1434.16	16.3615		1434.16	11.5748		1434.16	6.47219		1434.16	1.47427
1432.51	26.6245		1432.51	21.4167		1432.51	16.3019		1432.51	11.489		1432.51	6.41244		1432.51	1.5417
1430.85	26.5841		1430.85	21.5363		1430.85	16.3461		1430.85	11.4792		1430.85	6.42403		1430.85	1.50345
1429.19	26.4694		1429.19	21.4393		1429.19	16.2865		1429.19	11.539		1429.19	6.52356		1429.19	1.47876
1427.54	26.5492		1427.54	21.4661		1427.54	16.3233		1427.54	11.4754		1427.54	6.52799		1427.54	1.52177
1425.88	26.4974		1425.88	21.3691		1425.88	16.3354		1425.88	11.5827		1425.88	6.54667		1425.88	1.55394
1424.23	26.5828		1424.23	21.508		1424.23	16.3969		1424.23	11.5285		1424.23	6.54397		1424.23	1.55632
1422.57	26.6167		1422.57	21.411		1422.57	16.3324		1422.57	11.5219		1422.57	6.49378		1422.57	1.56682
1420.91	26.6164		1420.91	21.4339		1420.91	16.3321		1420.91	11.5469		1420.91	6.48396		1420.91	1.53402
1419.25	26.5932		1419.25	21.4336		1419.25	16.3046		1419.25	11.6319		1419.25	6.54537		1419.25	1.56075
1417.6	26.4901		1417.6	21.5183		1417.6	16.3043		1417.6	11.5937		1417.6	6.56641		1417.6	1.57935
1415.94	26.5982		1415.94	21.3673		1415.94	16.4029		1415.94	11.5744		1415.94	6.58506		1415.94	1.75747
1414.28	26.7292		1414.28	21.4636		1414.28	16.3952		1414.28	11.5961		1414.28	6.53965		1414.28	1.63545
1412.62	26.7345		1412.62	21.5058		1412.62	16.3973		1412.62	11.6053		1412.62	6.55593		1412.62	1.57024
1410.96	26.6828		1410.96	21.4823		1410.96	16.3822		1410.96	11.5512		1410.96	6.48209		1410.96	1.62396
1409.3	26.6368		1409.3	21.509		1409.3	16.3721		1409.3	11.5541		1409.3	6.61929		1409.3	1.63982
1407.64	26.7562		1407.64	21.5974		1407.64	16.4409		1407.64	11.6611		1407.64	6.61658		1407.64	1.61787
1405.98	26.8813		1405.98	21.5508		1405.98	16.374		1405.98	11.6324		1405.98	6.57358		1405.98	1.68504
1404.32	26.7555		1404.32	21.5659		1404.32	16.3613		1404.32	11.7109		1404.32	6.62301		1404.32	1.72788
1402.66	26.8406		1402.66	21.6118		1402.66	16.3142		1402.66	11.7516		1402.66	6.70321		1402.66	1.76801
1401	26.7035		1401	21.6423		1401	16.4101		1401	11.8301		1401	6.62706		1401	1.75144
1399.34	26.9025		1399.34	21.5611		1399.34	16.4492		1399.34	11.8487		1399.34	6.70249		1399.34	1.72679
1397.67	26.9248		1397.67	21.5723		1397.67	16.4292		1397.67	11.7158		1397.67	6.75185		1397.67	1.81545
1396.01	26.9928		1396.01	21.6413		1396.01	16.4708		1396.01	11.8857		1396.01	6.76331		1396.01	1.84743
1394.35	26.9639		1394.35	21.6641		1394.35	16.436		1394.35	11.8506		1394.35	6.86469		1394.35	1.874
1392.69	26.9635		1392.69	21.76		1392.69	16.5563		1392.69	11.907		1392.69	6.79569		1392.69	2.08658
1391.02	27.1167		1391.02	21.648		1391.02	16.556		1391.02	11.8877		1391.02	6.79295		1391.02	2.01067
1389.36	27.0821		1389.36	21.8593		1389.36	16.5975		1389.36	12.0574		1389.36	6.86825		1389.36	2.1369
1387.69	27.1784		1387.69	21.8166		1387.69	16.5627		1387.69	12.0916		1387.69	6.99316		1387.69	2.14453
1386.03	27.2177		1386.03	21.8778		1386.03	16.6239		1386.03	12.1857		1386.03	6.96201		1386.03	2.3865
1384.36	27.3992		1384.36	21.9236		1384.36	16.7048		1384.36	12.2387		1384.36	7.00178		1384.36	2.45871
1382.7	27.3589		1382.7	22.0309		1382.7	16.729		1382.7	12.2225		1382.7	7.09823		1382.7	2.59012
1381.03	27.5232		1381.03	22.1689		1381.03	16.8835		1381.03	12.3511		1381.03	7.23717		1381.03	2.77531
1379.37	27.7272		1379.37	22.1915		1379.37	16.9003		1379.37	12.659		1379.37	7.29338		1379.37	2.97119
1377.7	28.0106		1377.7	22.2679		1377.7	17.0794		1377.7	12.7371		1377.7	7.39208		1377.7	3.24771
1376.03	28.1179		1376.03	22.4634		1376.03	17.2116		1376.03	12.9252		1376.03	7.57809		1376.03	3.57523
1374.37	28.3728		1374.37	22.7357		1374.37	17.388		1374.37	13.2202		1374.37	7.73333		1374.37	3.86226
1372.7	28.6843		1372.7	22.8619		1372.7	17.503		1372.7	13.4648		1372.7	7.90502		1372.7	4.08464
1371.03	29.0297		1371.03	23.2262		1371.03	17.6621		1371.03	13.7501		1371.03	8.25596		1371.03	4.30423
1369.36	29.4715		1369.36	23.3944		1369.36	17.8383		1369.36	13.9756		1369.36	8.31189		1369.36	4.92423
1367.7	29.4592		1367.7	23.4513		1367.7	18.0316		1367.7	14.2764		1367.7	8.57297		1367.7	5.23492
1366.03	29.9574		1366.03	23.8267		1366.03	18.2004		1366.03	14.7467		1366.03	8.78679		1366.03	5.57772
1364.36	30.2682		1364.36	24.1137		1364.36	18.4082		1364.36	14.931		1364.36	8.98872		1364.36	5.92038
1362.69	30.647		1362.69	24.251		1362.69	18.5842		1362.69	15.244		1362.69	9.26128		1362.69	6.18501
1361.02	30.8329		1361.02	24.4073		1361.02	18.6349		1361.02	15.3496		1361.02	9.37585		1361.02	6.32064
1359.35	31.1603		1359.35	24.6518		1359.35	18.823		1359.35	15.6279		1359.35	9.53984		1359.35	6.34078
1357.68	31.125		1357.68	24.6087		1357.68	18.9202		1357.68	15.7899		1357.68	9.69434		1357.68	6.60516
1356.01	31.3843		1356.01	24.6997		1356.01	19.0248		1356.01	15.889		1356.01	9.88174		1356.01	6.99285
1354.33	31.4793		1354.33	25.0705		1354.33	18.9627		1354.33	15.9003		1354.33	9.81008		1354.33	6.76334
1352.66	31.359		1352.66	24.7974		1352.66	19.0353		1352.66	16.0026		1352.66	9.92911		1352.66	6.88261
1350.99	31.3633		1350.99	24.8308		1350.99	19.032		1350.99	15.879		1350.99	10.001		1350.99	7.05278
1349.32	31.5204		1349.32	24.9486		1349.32	19.0508		1349.32	16.1631		1349.32	10.1929		1349.32	6.71348
1347.65	31.4342		1347.65	24.645		1347.65	18.9275		1347.65	15.9361		1347.65	10.093		1347.65	6.45473
1345.97	31.2857		1345.97	24.8201		1345.97	19.0173		1345.97	15.7092		1345.97	10.0026		1345.97	6.49089
1344.3	31.341		1344.3	24.7349		1344.3	18.7961		1344.3	15.8146		1344.3	9.95448		1344.3	6.1278
1342.63	31.2152		1342.63	24.4545		1342.63	18.6632		1342.63	15.4594		1342.63	9.76066		1342.63	5.83719
1340.95	30.7672		1340.95	24.423		1340.95	18.5156		1340.95	15.2609		1340.95	9.69149		1340.95	5.46903
1339.28	30.8395		1339.28	24.3647		1339.28	18.5051		1339.28	15.1127		1339.28	9.34036		1339.28	5.13584
1337.6	30.5331		1337.6	23.9928		1337.6	18.3503		1337.6	14.8831		1337.6	9.27131		1337.6	4.83224
1335.93	30.142		1335.93	23.8275		1335.93	18.1075		1335.93	14.6067		1335.93	9.02846		1335.93	4.53412
1334.25	30.1579		1334.25	23.6203		1334.25	17.9895		1334.25	14.321		1334.25	8.97595		1334.25	4.27091
1332.58	29.8461		1332.58	23.5545		1332.58	17.8643		1332.58	14.0354		1332.58	8.72622		1332.58	3.9329
1330.9	29.4046		1330.9	23.229		1330.9	17.5973		1330.9	13.7155		1330.9	8.47426		1330.9	3.84915
1329.22	29.2343		1329.22	23.0602		1329.22	17.5846		1329.22	13.4114		1329.22	8.31393		1329.22	3.61835
1327.55	28.8214		1327.55	22.9449		1327.55	17.4302		1327.55	13.492		1327.55	8.18182		1327.55	3.32615
1325.87	28.8432		1325.87	22.8298		1325.87	17.2856		1325.87	13.3412		1325.87	7.99113		1325.87	3.23723
1324.19	28.5207		1324.19	22.7299		1324.19	17.1923		1324.19	13.1655		1324.19	7.97173		1324.19	2.93186
1322.51	28.2774		1322.51	22.5881		1322.51	17.0356		1322.51	12.8493		1322.51	7.72488		1322.51	2.92857
1320.84	28.147		1320.84	22.3853		1320.84	16.9766		1320.84	12.755		1320.84	7.53909		1320.84	2.71156
1319.16	28.1069		1319.16	22.2627		1319.16	16.9226		1319.16	12.5671		1319.16	7.43542		1319.16	2.63086
1317.48	27.954		1317.48	22.2584		1317.48	16.8709		1317.48	12.5759		1317.48	7.5427		1317.48	2.45139
1315.8	27.7223		1315.8	21.9833		1315.8	16.7949		1315.8	12.3412		1315.8	7.25632		1315.8	2.3601
1314.12	27.6259		1314.12	22.1163		1314.12	16.6873		1314.12	12.2877		1314.12	7.10358		1314.12	2.30889
1312.44	27.4733		1312.44	21.9367		1312.44	16.6138		1312.44	12.2653		1312.44	7.1125		1312.44	2.22834
1310.76	27.4333		1310.76	22.0049		1310.76	16.6768		1310.76	12.0496		1310.76	7.002		1310.76	2.0491
1309.08	27.2864		1309.08	21.7911		1309.08	16.6253		1309.08	12.018		1309.08	7.01094		1309.08	1.94997
1307.4	27.1902		1307.4	21.7259		1307.4	16.4739		1307.4	11.9365		1307.4	6.842		1307.4	1.87222
1305.71	27.0265		1305.71	21.7179		1305.71	16.4979		1305.71	11.9704		1305.71	6.72929		1305.71	1.81049
1304.03	26.9979		1304.03	21.6985		1304.03	16.4197		1304.03	11.7736		1304.03	6.76869		1304.03	1.78345
1302.35	26.9412		1302.35	21.6449		1302.35	16.4559		1302.35	11.7046		1302.35	6.67476		1302.35	1.69246
1300.67	26.9014		1300.67	21.5493		1300.67	16.4167		1300.67	11.7417		1300.67	6.59723		1300.67	1.69743
1298.98	26.8279		1298.98	21.3854		1298.98	16.3214		1298.98	11.7008		1298.98	6.62027		1298.98	1.58251
1297.3	26.7319		1297.3	21.5715		1297.3	16.3796		1297.3	11.7004		1297.3	6.58721		1297.3	1.59816
1295.62	26.8103		1295.62	21.3886		1295.62	16.3306		1295.62	11.6253		1295.62	6.56817		1295.62	1.52059
1293.93	26.7424		1293.93	21.491		1293.93	16.2768		1293.93	11.625		1293.93	6.49073		1293.93	1.55488
1292.25	26.596		1292.25	21.3728		1292.25	16.296		1292.25	11.5406		1292.25	6.43669		1292.25	1.53326
1290.56	26.6518		1290.56	21.2698		1290.56	16.3152		1290.56	11.3412		1290.56	6.37332		1290.56	1.51962
1288.88	26.5503		1288.88	21.3342		1288.88	16.2687		1288.88	11.5306		1288.88	6.43842		1288.88	1.47939
1287.19	26.5669		1287.19	21.4251		1287.19	16.2126		1287.19	11.3997		1287.19	6.43111		1287.19	1.44183
1285.51	26.5497		1285.51	21.3906		1285.51	16.1661		1285.51	11.474		1285.51	6.45181		1285.51	1.44951
1283.82	26.4708		1283.82	21.2953		1283.82	16.2315		1283.82	11.4115		1283.82	6.30449		1283.82	1.41463
1282.13	26.4256		1282.13	21.2533		1282.13	16.1632		1282.13	11.4237		1282.13	6.32521		1282.13	1.36382
1280.45	26.5655		1280.45	21.2189		1280.45	16.1241		1280.45	11.2959		1280.45	6.37625		1280.45	1.37682
1278.76	26.5259		1278.76	21.2945		1278.76	16.2259		1278.76	11.3609		1278.76	6.31532		1278.76	1.36856
1277.07	26.363		1277.07	21.2525		1277.07	16.1261		1277.07	11.3824		1277.07	6.30805		1277.07	1.3603
1275.38	26.3795		1275.38	21.2143		1275.38	16.1501		1275.38	11.3231		1275.38	6.25648		1275.38	1.30689
1273.7	26.4633		1273.7	21.1723		1273.7	16.1305		1273.7	11.27		1273.7	6.26088		1273.7	1.32785
1272.01	26.5415		1272.01	21.119		1272.01	16.1011		1272.01	11.2573		1272.01	6.30022		1272.01	1.33288
1270.32	26.3562		1270.32	21.2173		1270.32	16.0912		1270.32	11.2353		1270.32	6.21608		1270.32	1.28747
1268.63	26.3559		1268.63	21.2208		1268.63	16.0425		1268.63	11.2444		1268.63	6.20884		1268.63	1.31639
1266.94	26.2828		1266.94	21.2661		1266.94	16.1028		1266.94	11.2472		1266.94	6.17132		1266.94	1.28958
1265.25	26.2153		1265.25	21.2052		1265.25	16.0299		1265.25	11.2655		1265.25	6.19668		1265.25	1.20441
1263.56	26.2767		1263.56	21.0761		1263.56	16.0345		1263.56	11.2932		1263.56	6.2616		1263.56	1.17498
1261.87	26.1812		1261.87	21.1213		1261.87	16.09		1261.87	11.2867		1261.87	6.24737		1261.87	1.25694
1260.18	26.2593		1260.18	21.1438		1260.18	16.0874		1260.18	11.1935		1260.18	6.2029		1260.18	1.24872
1258.49	26.2367		1258.49	21.083		1258.49	16.0145		1258.49	11.1622		1258.49	6.24219		1258.49	1.19544
1256.79	26.2756		1256.79	21.1244		1256.79	16.0603		1256.79	11.2084		1256.79	6.17913		1256.79	1.17664
1255.1	26.1075		1255.1	21.0598		1255.1	15.9826		1255.1	11.1214		1255.1	6.11378		1255.1	1.20023
1253.41	26.1744		1253.41	21.0331		1253.41	16.0574		1253.41	11.1739		1253.41	6.14841		1253.41	1.14965
1251.72	26.1518		1251.72	21.048		1251.72	16.0717		1251.72	11.1829		1251.72	6.12493		1251.72	1.12292
1250.02	26.3024		1250.02	21.0554		1250.02	15.9941		1250.02	11.0898		1250.02	6.02477		1250.02	1.18358
1248.33	26.2519		1248.33	21.0476		1248.33	16.0374		1248.33	11.1545		1248.33	6.12213		1248.33	1.15951
1246.63	26.2125		1246.63	21.002		1246.63	15.9913		1246.63	11.1821		1246.63	6.15441		1246.63	1.14603
1244.94	26.2011		1244.94	21.0358		1244.94	15.9862		1244.94	11.1324		1244.94	6.11933		1244.94	1.1352
1243.25	26.1282		1243.25	21.0658		1243.25	15.9594		1243.25	11.2157		1243.25	6.10748		1243.25	1.07676
1241.55	26.1782		1241.55	21.0353		1241.55	16.0389		1241.55	11.1752		1241.55	6.08403		1241.55	1.12678
1239.86	26.1389		1239.86	21.0767		1239.86	15.9904		1239.86	11.1193		1239.86	6.18592		1239.86	1.11068
1238.16	26.1498		1238.16	21.0576		1238.16	15.966		1238.16	11.0912		1238.16	6.1207		1238.16	1.18447
1236.46	26.0268		1236.46	21.0951		1236.46	15.9948		1236.46	11.1034		1236.46	6.09494		1236.46	1.10228
1234.77	26.0991		1234.77	21.0609		1234.77	15.8811		1234.77	11.0908		1234.77	6.08775		1234.77	1.1179
1233.07	26.1881		1233.07	21.0946		1233.07	15.9558		1233.07	11.0319		1233.07	5.97622		1233.07	1.12823
1231.37	26.0819		1231.37	21.0038		1231.37	15.9556		1231.37	11.0996		1231.37	6.04324		1231.37	1.07516
1229.68	26.1374		1229.68	20.9923		1229.68	15.9602		1229.68	11.0963		1229.68	6.00594		1229.68	1.07229
1227.98	26.1038		1227.98	21.0072		1227.98	15.9479		1227.98	11.0528		1227.98	6.10769		1227.98	1.02981
1226.28	26.1202		1226.28	21.0183		1226.28	15.9188		1226.28	11.0341		1226.28	6.03331		1226.28	1.10087
1224.58	26.1701		1224.58	20.9464		1224.58	15.9379		1224.58	11.0462		1224.58	6.08868		1224.58	1.06633
1222.88	26.0808		1222.88	21.0782		1222.88	15.9112		1222.88	11.0521		1222.88	5.97961		1222.88	1.05818
1221.18	26.0694		1221.18	20.9121		1221.18	15.8869		1221.18	11.0303		1221.18	6.03034		1221.18	1.09226
1219.48	26.058		1219.48	20.9986		1219.48	15.9975		1219.48	11.0486		1219.48	6.03012		1219.48	1.04982
1217.78	26.119		1217.78	21.0323		1217.78	15.966		1217.78	11.0453		1217.78	6.07387		1217.78	1.01795
1216.08	26.1355		1216.08	20.9755		1216.08	15.9152		1216.08	10.9649		1216.08	6.032		1216.08	1.06256
1214.38	26.1853		1214.38	20.949		1214.38	15.9969		1214.38	11.0356		1214.38	6.06185		1214.38	1.01752
1212.68	25.9904		1212.68	20.9488		1212.68	15.9052		1212.68	10.9984		1212.68	6.00843		1212.68	1.05683
1210.98	26.0625		1210.98	21.0465		1210.98	15.97		1210.98	10.9859		1210.98	6.00359		1210.98	1.06188
1209.28	25.9955		1209.28	20.9446		1209.28	15.9361		1209.28	10.9641		1209.28	6.08892		1209.28	1.00106
1207.57	26.1009		1207.57	20.9068		1207.57	15.9575		1207.57	10.9885		1207.57	6.05633		1207.57	1.00875
1205.87	26.1118		1205.87	20.9254		1205.87	15.89		1205.87	11.0345		1205.87	6.0353		1205.87	0.998
1204.17	26.0449		1204.17	20.9252		1204.17	15.9956		1204.17	11.0312		1204.17	6.05588		1204.17	1.05571
1202.46	26.0558		1202.46	20.9927		1202.46	15.8584		1202.46	10.9941		1202.46	5.92629		1202.46	0.98968
1200.76	26		1200.76	21		1200.76	16		1200.76	11		1200.76	6		1200.76	1
1199.05	26.0164		1199.05	20.9284		1199.05	15.9133		1199.05	10.9875		1199.05	6.03211		1199.05	1.0261
1197.35	26.0662		1197.35	20.9883		1197.35	15.8818		1197.35	10.9842		1197.35	5.98342		1197.35	1.01536
1195.65	25.9827		1195.65	20.943		1195.65	15.8961		1195.65	10.9809		1195.65	6.02013		1195.65	1.06248
1193.94	25.9714		1193.94	20.9315		1193.94	15.9031		1193.94	10.9623		1193.94	5.96684		1193.94	1.01493
1192.24	26.0544		1192.24	20.8938		1192.24	15.8693		1192.24	11.0205		1192.24	5.96895		1192.24	0.99368
1190.53	26.0431		1190.53	20.9311		1190.53	15.8523		1190.53	10.9711		1190.53	6.04024		1190.53	1.04866
1188.82	25.9763		1188.82	20.9347		1188.82	15.9145		1188.82	10.8971		1188.82	5.95009		1188.82	1.05107
1187.12	26.0371		1187.12	20.897		1187.12	15.9047		1187.12	10.9246		1187.12	5.89224		1187.12	1.01144
1185.41	26.0092		1185.41	21.0018		1185.41	15.8013		1185.41	10.9182		1185.41	5.96812		1185.41	1.00334
1183.7	25.9535		1183.7	20.8328		1183.7	15.9475		1183.7	10.9119		1183.7	5.98866		1183.7	0.95849
1181.99	25.9422		1181.99	20.8701		1181.99	15.9233		1181.99	10.881		1181.99	5.9631		1181.99	0.96878
1180.29	26.0584		1180.29	20.8325		1180.29	15.8512		1180.29	10.8563		1180.29	5.91452		1180.29	0.99483
1178.58	25.9141		1178.58	20.8548		1178.58	15.8822		1178.58	10.9972		1178.58	5.99493		1178.58	1.02348
1176.87	25.9915		1176.87	20.9333		1176.87	15.9131		1176.87	10.9541		1176.87	5.95558		1176.87	0.92356
1175.16	25.9802		1175.16	20.9031		1175.16	15.8818		1175.16	10.9661		1175.16	5.97149		1175.16	0.94697
1173.45	25.98		1173.45	20.873		1173.45	15.8624		1173.45	10.9383		1173.45	5.95517		1173.45	0.95726
1171.74	26.0296		1171.74	20.8878		1171.74	15.8503		1171.74	10.9106		1171.74	6.0125		1171.74	0.90724
1170.03	26.0128		1170.03	20.8651		1170.03	15.8764		1170.03	10.9318		1170.03	6.01458		1170.03	0.94112
1168.32	26.0181		1168.32	20.8649		1168.32	15.814		1168.32	10.9132		1168.32	5.96146		1168.32	0.96451
1166.61	26.0621		1166.61	20.9022		1166.61	15.9		1166.61	10.8916		1166.61	5.94746		1166.61	0.8988
1164.9	26.0121		1164.9	20.902		1164.9	15.9142		1164.9	10.8393		1164.9	5.91507		1164.9	1.0034
1163.18	25.9566		1163.18	20.8906		1163.18	15.8613		1163.18	10.8973		1163.18	5.93556		1163.18	0.90365
1161.47	25.9841		1161.47	20.8455		1161.47	15.8707		1161.47	10.9216		1161.47	5.98133		1161.47	0.95845
1159.76	26.0336		1159.76	20.9313		1159.76	15.8418		1159.76	10.9123		1159.76	6.0018		1159.76	0.95301
1158.05	25.9173		1158.05	20.8863		1158.05	15.7962		1158.05	10.9029		1158.05	5.93267		1158.05	0.9214
1156.33	25.9392		1156.33	20.9833		1156.33	15.863		1156.33	10.9241		1156.33	5.94855		1156.33	0.91859
1154.62	25.9445		1154.62	20.9644		1154.62	15.8532		1154.62	10.8627		1154.62	6.01034		1154.62	0.91839
1152.91	25.9664		1152.91	20.9118		1152.91	15.8196		1152.91	10.8687		1152.91	5.92059		1152.91	0.96528
1151.19	26.0767		1151.19	20.8668		1151.19	15.8553		1151.19	10.9388		1151.19	5.97089		1151.19	0.97292
1149.48	25.9992		1149.48	20.848		1149.48	15.7787		1149.48	10.8866		1149.48	5.91332		1149.48	0.9518
1147.76	25.9989		1147.76	20.9001		1147.76	15.8191		1147.76	10.9262		1147.76	5.91083		1147.76	0.97512
1146.05	25.9987		1146.05	20.9223		1146.05	15.8714		1146.05	10.8404		1146.05	5.88999		1146.05	0.98798
1144.33	25.9709		1144.33	20.8586		1144.33	15.8211		1144.33	10.8983		1144.33	5.91273		1144.33	0.993
1142.62	25.9045		1142.62	20.8883		1142.62	15.8663		1142.62	10.8187		1142.62	5.88961		1142.62	0.92225
1140.9	25.9871		1140.9	20.847		1140.9	15.8065		1140.9	10.8796		1140.9	5.91922		1140.9	0.98474
1139.18	25.8656		1139.18	20.9215		1139.18	15.8015		1139.18	10.8763		1139.18	5.86173		1139.18	1.0237
1137.46	25.915		1137.46	20.828		1137.46	15.7966		1137.46	10.9006		1137.46	5.92341		1137.46	0.95821
1135.75	25.9093		1135.75	20.8502		1135.75	15.8155		1135.75	10.8851		1135.75	5.90947		1135.75	0.99455
1134.03	25.9972		1134.03	20.8873		1134.03	15.8797		1134.03	10.8849		1134.03	5.91615		1134.03	0.97346
1132.31	26.0301		1132.31	20.8722		1132.31	15.8175		1132.31	10.9854		1132.31	5.93198		1132.31	0.99152
1130.59	25.8536		1130.59	20.846		1130.59	15.9151		1130.59	10.8815		1130.59	5.92949		1130.59	0.9887
1128.87	26.0682		1128.87	20.9464		1128.87	15.7886		1128.87	10.8569		1128.87	5.8858		1128.87	0.94415
1127.15	26.0019		1127.15	20.8717		1127.15	15.8432		1127.15	10.875		1127.15	5.849		1127.15	0.94394
1125.43	25.8751		1125.43	20.8678		1125.43	15.8192		1125.43	10.951		1125.43	5.95864		1125.43	0.90985
1123.71	25.9189		1123.71	20.7596		1123.71	15.8833		1123.71	10.9112		1123.71	5.94013		1123.71	0.88359
1121.99	25.9792		1121.99	20.8302		1121.99	15.8736		1121.99	10.8836		1121.99	5.89648		1121.99	0.97201
1120.27	25.9625		1120.27	20.8523		1120.27	15.8282		1120.27	10.8773		1120.27	5.90544		1120.27	0.87019
1118.55	25.9073		1118.55	20.867		1118.55	15.8423		1118.55	10.8284		1118.55	5.93725		1118.55	0.94554
1116.83	25.9456		1116.83	20.8185		1116.83	15.816		1116.83	10.8435		1116.83	5.88448		1116.83	0.89846
1115.11	25.9344		1115.11	20.8146		1115.11	15.7825		1115.11	10.892		1115.11	5.82488		1115.11	0.90608
1113.38	25.9892		1113.38	20.859		1113.38	15.8608		1113.38	10.8857		1113.38	5.92751		1113.38	0.87726
1111.66	26.0055		1111.66	20.8589		1111.66	15.8107		1111.66	10.9068		1111.66	5.8291		1111.66	0.90309
1109.94	25.9064		1109.94	20.7992		1109.94	15.82		1109.94	10.791		1109.94	5.90428		1109.94	0.84305
1108.21	25.9446		1108.21	20.8696		1108.21	15.8341		1108.21	10.8578		1108.21	5.88582		1108.21	0.86108
1106.49	25.8676		1106.49	20.8397		1106.49	15.7626		1106.49	10.8697		1106.49	5.82628		1106.49	0.83489
1104.77	25.9332		1104.77	20.8581		1104.77	15.7411		1104.77	10.8452		1104.77	5.89001		1104.77	0.86852
1103.04	25.8836		1103.04	20.8431		1103.04	15.7552		1103.04	10.7873		1103.04	5.90807		1103.04	0.85533
1101.32	25.8615		1101.32	20.8355		1101.32	15.8001		1101.32	10.778		1101.32	5.7961		1101.32	0.85255
1099.59	25.9875		1099.59	20.8353		1099.59	15.8285		1099.59	10.872		1099.59	5.87119		1099.59	0.77961
1097.87	25.9654		1097.87	20.8277		1097.87	15.8093		1097.87	10.8476		1097.87	5.91661		1097.87	0.88596
1096.14	26.0035		1096.14	20.7756		1096.14	15.7522		1096.14	10.8383		1096.14	5.90501		1096.14	0.88577
1094.41	25.9869		1094.41	20.8348		1094.41	15.8018		1094.41	10.835		1094.41	5.86379		1094.41	0.84403
1092.69	25.9154		1092.69	20.8754		1092.69	15.7281		1092.69	10.8409		1092.69	5.83399		1092.69	0.8101
1090.96	25.9536		1090.96	20.7862		1090.96	15.8062		1090.96	10.8772		1090.96	5.85659		1090.96	0.80733
1089.23	25.9095		1089.23	20.8268		1089.23	15.7895		1089.23	10.7981		1089.23	5.82224		1089.23	0.79158
1087.5	25.86		1087.5	20.8303		1087.5	15.7608		1087.5	10.8343		1087.5	5.85395		1087.5	0.83034
1085.78	25.8927		1085.78	20.7857		1085.78	15.7725		1085.78	10.8372		1085.78	5.88108		1085.78	0.89761
1084.04	25.9199		1084.04	20.7929		1084.04	15.7795		1084.04	10.8461		1084.04	5.81944		1084.04	0.81183
1082.32	25.9088		1082.32	20.8372		1082.32	15.7746		1082.32	10.8308		1082.32	5.84657		1082.32	0.82721
1080.59	26.0126		1080.59	20.8074		1080.59	15.7886		1080.59	10.7609		1080.59	5.85549		1080.59	0.75703
1078.86	25.9412		1078.86	20.822		1078.86	15.7695		1078.86	10.7304		1078.86	5.84394		1078.86	0.83204
1077.13	25.8699		1077.13	20.8441		1077.13	15.7741		1077.13	10.7424		1077.13	5.81419		1077.13	0.78003
1075.4	25.8861		1075.4	20.8032		1075.4	15.7242		1075.4	10.7725		1075.4	5.83221		1075.4	0.74359
1073.67	25.9296		1073.67	20.7771		1073.67	15.7832		1073.67	10.7935		1073.67	5.82293		1073.67	0.7797
1071.94	25.9294		1071.94	20.7732		1071.94	15.7996		1071.94	10.751		1071.94	5.82503		1071.94	0.67853
1070.2	25.7762		1070.2	20.8064		1070.2	15.7498		1070.2	10.8356		1070.2	5.79531		1070.2	0.74053
1068.47	25.7924		1068.47	20.7359		1068.47	15.7709		1068.47	10.79		1068.47	5.78151		1068.47	0.75072
1066.74	25.8687		1066.74	20.7838		1066.74	15.7447		1066.74	10.7475		1066.74	5.82677		1066.74	0.6988
1065.01	25.7484		1065.01	20.7615		1065.01	15.7706		1065.01	10.717		1065.01	5.75847		1065.01	0.709
1063.27	25.8192		1063.27	20.7355		1063.27	15.7066		1063.27	10.735		1063.27	5.7969		1063.27	0.75024
1061.54	25.9501		1061.54	20.7316		1061.54	15.7324		1061.54	10.7379		1061.54	5.71729		1061.54	0.75267
1059.8	25.8516		1059.8	20.7351		1059.8	15.6898		1059.8	10.7589		1059.8	5.78748		1059.8	0.75251
1058.07	25.6877		1058.07	20.7645		1058.07	15.6872		1058.07	10.7195		1058.07	5.75555		1058.07	0.74976
1056.34	25.7258		1056.34	20.7681		1056.34	15.6847		1056.34	10.7133		1056.34	5.73497		1056.34	0.7496
1054.6	25.7583		1054.6	20.7236		1054.6	15.7578		1054.6	10.7554		1054.6	5.68719		1054.6	0.69
1052.87	25.7964		1052.87	20.7493		1052.87	15.6821		1052.87	10.7341		1052.87	5.74373		1052.87	0.74411
1051.13	25.8016		1051.13	20.727		1051.13	15.6843		1051.13	10.743		1051.13	5.73223		1051.13	0.7052
1049.39	25.7633		1049.39	20.6567		1049.39	15.7431		1049.39	10.6945		1049.39	5.68221		1049.39	0.6095
1047.66	25.8177		1047.66	20.7267		1047.66	15.7312		1047.66	10.6521		1047.66	5.78404		1047.66	0.72298
1045.92	25.8229		1045.92	20.6712		1045.92	15.6838		1045.92	10.661		1045.92	5.71817		1045.92	0.69959
1044.18	25.7029		1044.18	20.66		1044.18	15.7096		1044.18	10.6217		1044.18	5.70896		1044.18	0.73299
1042.45	25.7844		1042.45	20.7594		1042.45	15.693		1042.45	10.6849		1042.45	5.67484		1042.45	0.73025
1040.71	25.6971		1040.71	20.6966		1040.71	15.6881		1040.71	10.6908		1040.71	5.73356		1040.71	0.69914
1038.97	25.7242		1038.97	20.7554		1038.97	15.6526		1038.97	10.7358		1038.97	5.67228		1038.97	0.64998
1037.23	25.9037		1037.23	20.7368		1037.23	15.6619		1037.23	10.7236		1037.23	5.69477		1037.23	0.68079
1035.49	25.8273		1035.49	20.6519		1035.49	15.6712		1035.49	10.6632		1035.49	5.73082		1035.49	0.72705
1033.75	25.7618		1033.75	20.7328		1033.75	15.6805		1033.75	10.7113		1033.75	5.72388		1033.75	0.73205
1032.01	25.7399		1032.01	20.648		1032.01	15.6191		1032.01	10.7262		1032.01	5.72372		1032.01	0.68035
1030.27	25.8431		1030.27	20.5889		1030.27	15.6543		1030.27	10.6206		1030.27	5.67835		1030.27	0.64928
1028.53	25.7777		1028.53	20.6882		1028.53	15.6142		1028.53	10.6897		1028.53	5.65559		1028.53	0.6646
1026.79	25.6198		1026.79	20.7064		1026.79	15.6423		1026.79	10.6926		1026.79	5.68484		1026.79	0.67219
1025.05	25.6632		1025.05	20.6364		1025.05	15.6468		1025.05	10.6352		1025.05	5.68921		1025.05	0.66689
1023.31	25.6576		1023.31	20.6804		1023.31	15.6796		1023.31	10.6201		1023.31	5.72295		1023.31	0.73625
1021.57	25.7661		1021.57	20.6765		1021.57	15.6747		1021.57	10.6711		1021.57	5.69569		1021.57	0.66661
1019.82	25.6845		1019.82	20.6102		1019.82	15.7005		1019.82	10.6168		1019.82	5.63908		1019.82	0.68962
1018.08	25.6517		1018.08	20.6689		1018.08	15.6533		1018.08	10.6467		1018.08	5.64572		1018.08	0.63545
1016.34	25.7602		1016.34	20.7128		1016.34	15.6884		1016.34	10.6195		1016.34	5.70427		1016.34	0.63788
1014.59	25.76		1014.59	20.676		1014.59	15.6154		1014.59	10.6104		1014.59	5.66124		1014.59	0.66346
1012.85	25.7382		1012.85	20.7125		1012.85	15.6905		1012.85	10.6012		1012.85	5.66335		1012.85	0.60419
1011.11	25.7272		1011.11	20.6536		1011.11	15.6199		1011.11	10.6552		1011.11	5.67675		1011.11	0.62976
1009.36	25.7324		1009.36	20.6388		1009.36	15.6761		1009.36	10.622		1009.36	5.7172		1009.36	0.66817
1007.62	25.7811		1007.62	20.646		1007.62	15.6384		1007.62	10.6309		1007.62	5.66067		1007.62	0.64234
1005.87	25.705		1005.87	20.6495		1005.87	15.6429		1005.87	10.6938		1005.87	5.6425		1005.87	0.68073
1004.12	25.7211		1004.12	20.6347		1004.12	15.6311		1004.12	10.5795		1004.12	5.66039		1004.12	0.65233
1002.38	25.7426		1002.38	20.5722		1002.38	15.6263		1002.38	10.6125		1002.38	5.65574		1002.38	0.64706
1000.63	25.7045		1000.63	20.6895		1000.63	15.6167		1000.63	10.6303		1000.63	5.63307		1000.63	0.65976
998.885	25.6935		998.885	20.7113		998.885	15.6119		998.885	10.6482		998.885	5.65095		998.885	0.64678
997.137	25.7855		997.137	20.6965		997.137	15.6751		997.137	10.6271		997.137	5.68459		997.137	0.61842
995.391	25.7366		995.391	20.6634		995.391	15.6116		995.391	10.6749		995.391	5.66193		995.391	0.62341
993.643	25.7743		993.643	20.6742		993.643	15.6279		993.643	10.5998		993.643	5.66854		993.643	0.6438
991.893	25.6496		991.893	20.6338		991.893	15.5317		991.893	10.6147		991.893	5.63689		991.893	0.65905
990.145	25.6928		990.145	20.575		990.145	15.5949		990.145	10.7015		990.145	5.67951		990.145	0.6948
988.395	25.7143		988.395	20.6591		988.395	15.6486		988.395	10.6444		988.395	5.60962		988.395	0.62288
986.646	25.6817		986.646	20.6773		986.646	15.6578		986.646	10.6023		986.646	5.66122		986.646	0.60993
984.896	25.7302		984.896	20.6296		984.896	15.6085		984.896	10.5962		984.896	5.72404		984.896	0.67642
983.146	25.7301		983.146	20.6953		983.146	15.6295		983.146	10.608		983.146	5.66543		983.146	0.61223
981.395	25.6867		981.395	20.622		981.395	15.6317		981.395	10.6348		981.395	5.65855		981.395	0.63259
979.645	25.6811		979.645	20.6072		979.645	15.6689		979.645	10.5658		979.645	5.59998		979.645	0.67854
977.893	25.6918		977.893	20.5742		977.893	15.6197		977.893	10.6166		977.893	5.64254		977.893	0.6016
976.141	25.7619		976.141	20.6691		976.141	15.6289		976.141	10.6404		976.141	5.57726		976.141	0.69105
974.389	25.6915		974.389	20.6214		974.389	15.575		974.389	10.5356		974.389	5.57938		974.389	0.5911
972.637	25.7075		972.637	20.6834		972.637	15.6403		972.637	10.6491		972.637	5.66458		972.637	0.62167
970.883	25.7668		970.883	20.6066		970.883	15.6098		970.883	10.6041		970.883	5.6128		970.883	0.61131
969.129	25.7126		969.129	20.6576		969.129	15.6424		969.129	10.592		969.129	5.62165		969.129	0.59583
967.375	25.6747		967.375	20.6355		967.375	15.5955		967.375	10.6457		967.375	5.58786		967.375	0.63406
965.621	25.7285		965.621	20.6135		965.621	15.6374		965.621	10.5858		965.621	5.63484		965.621	0.66971
963.867	25.6636		963.867	20.5914		963.867	15.5883		963.867	10.5797		963.867	5.65489		963.867	0.64912
962.113	25.7983		962.113	20.6132		962.113	15.6021		962.113	10.5616		962.113	5.63681		962.113	0.61832
960.357	25.728		960.357	20.6569		960.357	15.6557		960.357	10.6332		960.357	5.61201		960.357	0.6284
958.602	25.6901		958.602	20.6202		958.602	15.6206		958.602	10.636		958.602	5.5693		958.602	0.5491
956.846	25.6415		956.846	20.6493		956.846	15.6274		956.846	10.6299		956.846	5.59382		956.846	0.62047
955.09	25.7599		955.09	20.6382		955.09	15.5503		955.09	10.6298		955.09	5.62954		955.09	0.6331
953.332	25.6304		953.332	20.5579		953.332	15.5805		953.332	10.5551		953.332	5.63613		953.332	0.63041
951.576	25.7057		951.576	20.5942		951.576	15.6317		951.576	10.5251		951.576	5.60016		951.576	0.57924
949.818	25.6355		949.818	20.6123		949.818	15.6432		949.818	10.5906		949.818	5.64033		949.818	0.56891
948.061	25.6946		948.061	20.5866		948.061	15.5988		948.061	10.5577		948.061	5.59318		948.061	0.59175
946.303	25.6945		946.303	20.5756		946.303	15.5218		946.303	10.5993		946.303	5.62886		946.303	0.62987
944.543	25.6405		944.543	20.59		944.543	15.5659		944.543	10.6379		944.543	5.6153		944.543	0.61444
942.785	25.6888		942.785	20.6045		942.785	15.5891		942.785	10.6229		942.785	5.57043		942.785	0.6347
941.025	25.7478		941.025	20.557		941.025	15.6029		941.025	10.5185		941.025	5.58149		941.025	0.58614
939.266	25.7369		939.266	20.5751		939.266	15.5842		939.266	10.566		939.266	5.60596		939.266	0.58856
937.506	25.6507		937.506	20.5932		937.506	15.5747		937.506	10.6225		937.506	5.59689		937.506	0.59608
935.744	25.6129		935.744	20.5858		935.744	15.5816		935.744	10.5866		935.744	5.61911		935.744	0.59595
933.984	25.6128		933.984	20.6838		933.984	15.5861		933.984	10.5627		933.984	5.62345		933.984	0.64165
932.223	25.6825		932.223	20.6073		932.223	15.5651		932.223	10.5715		932.223	5.59204		932.223	0.61606
930.461	25.6018		930.461	20.5781		930.461	15.5836		930.461	10.5714		930.461	5.59191		930.461	0.5752
928.699	25.6446		928.699	20.6543		928.699	15.6299		928.699	10.595		928.699	5.54042		928.699	0.53437
926.936	25.7519		926.936	20.6724		926.936	15.574		926.936	10.5622		926.936	5.54923		926.936	0.58259
925.174	25.784		925.174	20.654		925.174	15.6134		925.174	10.5799		925.174	5.59599		925.174	0.60535
923.41	25.6764		923.41	20.603		923.41	15.6086		923.41	10.6036		923.41	5.57131		923.41	0.52639
921.646	25.6655		921.646	20.5993		921.646	15.5783		921.646	10.5856		921.646	5.57119		921.646	0.57204
919.883	25.6815		919.883	20.5992		919.883	15.6107		919.883	10.5647		919.883	5.57776		919.883	0.55921
918.119	25.7135		918.119	20.5627		918.119	15.5803		918.119	10.5794		918.119	5.52857		918.119	0.55401
916.354	25.708		916.354	20.6497		916.354	15.557		916.354	10.6357		916.354	5.60873		916.354	0.59962
914.588	25.6274		914.588	20.6096		914.588	15.6103		914.588	10.5227		914.588	5.57516		914.588	0.51566
912.822	25.6648		912.822	20.6204		912.822	15.5869		912.822	10.5464		912.822	5.60178		912.822	0.56635
911.057	25.729		911.057	20.5586		911.057	15.5775		911.057	10.6235		911.057	5.57714		911.057	0.584
909.291	25.6538		909.291	20.5875		909.291	15.6122		909.291	10.6411		909.291	5.57924		909.291	0.62449
907.523	25.6858		907.523	20.6055		907.523	15.5402		907.523	10.5935		907.523	5.60139		907.523	0.58121
905.758	25.6696		905.758	20.6054		905.758	15.5818		905.758	10.5578		905.758	5.63243		905.758	0.58108
903.99	25.6534		903.99	20.5799		903.99	15.635		903.99	10.5784		903.99	5.57219		903.99	0.51753
902.223	25.7229		902.223	20.6087		902.223	15.5398		902.223	10.5931		902.223	5.61213		902.223	0.61888
900.455	25.6959		900.455	20.6086		900.455	15.6115		900.455	10.4981		900.455	5.59197		900.455	0.57563
898.686	25.7761		898.686	20.67		898.686	15.5465		898.686	10.6314		898.686	5.62299		898.686	0.61354
896.916	25.6742		896.916	20.5214		896.916	15.5349		896.916	10.5779		896.916	5.56502		896.916	0.57539
895.148	25.6152		895.148	20.601		895.148	15.5718		895.148	10.5719		895.148	5.57602		895.148	0.53725
893.377	25.7274		893.377	20.5429		893.377	15.5763		893.377	10.5895		893.377	5.59368		893.377	0.51686
891.607	25.6257		891.607	20.6043		891.607	15.6109		891.607	10.5331		891.607	5.61356		891.607	0.56741
889.838	25.6255		889.838	20.6512		889.838	15.6223		889.838	10.5774		889.838	5.5712		889.838	0.61794
888.066	25.7697		888.066	20.6004		888.066	15.5898		888.066	10.5122		888.066	5.58663		888.066	0.57983
886.295	25.6894		886.295	20.6473		886.295	15.6082		886.295	10.5624		886.295	5.5554		886.295	0.60249
884.523	25.6518		884.523	20.5315		884.523	15.6057		884.523	10.5445		884.523	5.53973		884.523	0.56439
882.752	25.6677		882.752	20.6507		882.752	15.6033		882.752	10.5473		882.752	5.56182		882.752	0.53897
880.98	25.6302		880.98	20.6397		880.98	15.55		880.98	10.6034		880.98	5.59722		880.98	0.56668
879.207	25.6087		879.207	20.5781		879.207	15.5268		879.207	10.5382		879.207	5.58378		879.207	0.56403
877.434	25.7527		877.434	20.5744		877.434	15.6214		877.434	10.5854		877.434	5.57255		877.434	0.61954
875.66	25.6938		875.66	20.6104		875.66	15.5889		875.66	10.5764		875.66	5.53915		875.66	0.5208
873.887	25.6937		873.887	20.6319		873.887	15.5772		873.887	10.5822		873.887	5.51907		873.887	0.58894
872.111	25.6669		872.111	20.6282		872.111	15.584		872.111	10.588		872.111	5.63206		872.111	0.6065
870.338	25.6401		870.338	20.6172		870.338	15.577		870.338	10.5347		870.338	5.5898		870.338	0.57858
868.562	25.7306		868.562	20.5702		868.562	15.6068		868.562	10.6202		868.562	5.57637		868.562	0.57845
866.787	25.6451		866.787	20.6494		866.787	15.5467		866.787	10.564		866.787	5.53635		866.787	0.58085
865.012	25.7249		865.012	20.6384		865.012	15.5443		865.012	10.6082		865.012	5.6293		865.012	0.58578
863.234	25.7621		863.234	20.595		863.234	15.5719		863.234	10.5785		863.234	5.6048		863.234	0.59827
861.459	25.7619		861.459	20.6382		861.459	15.5717		861.459	10.5961		861.459	5.60023		861.459	0.57795
859.682	25.7245		859.682	20.6056		859.682	15.5947		859.682	10.5369		859.682	5.58018		859.682	0.56269
857.904	25.7137		857.904	20.573		857.904	15.5807		857.904	10.5899		857.904	5.6044		857.904	0.63572
856.127	25.7454		856.127	20.6738		856.127	15.5944		856.127	10.5367		856.127	5.60649		856.127	0.57253
854.348	25.6654		854.348	20.634		854.348	15.5828		854.348	10.516		854.348	5.57537		854.348	0.52702
852.57	25.7611		852.57	20.6447		852.57	15.6195		852.57	10.5571		852.57	5.59959		852.57	0.60254
850.791	25.6705		850.791	20.6409		850.791	15.5664		850.791	10.5835		850.791	5.59724		850.791	0.63013
849.012	25.7927		849.012	20.5976		849.012	15.6307		849.012	10.5746		849.012	5.55288		849.012	0.5544
847.232	25.7393		847.232	20.6119		847.232	15.5477		847.232	10.598		847.232	5.56161		847.232	0.56939
845.453	25.6913		845.453	20.6369		845.453	15.5844		845.453	10.592		845.453	5.59465		845.453	0.58942
843.672	25.7124		843.672	20.626		843.672	15.6119		843.672	10.6125		843.672	5.5901		843.672	0.59685
841.891	25.7495		841.891	20.6762		841.891	15.5681		841.891	10.5593		841.891	5.6209		841.891	0.57658
840.109	25.6749		840.109	20.6041		840.109	15.5863		840.109	10.6004		840.109	5.59647		840.109	0.58904
838.328	25.7757		838.328	20.6112		838.328	15.554		838.328	10.6268		838.328	5.561		838.328	0.60905
836.547	25.6693		836.547	20.6614		836.547	15.5654		836.547	10.5708		836.547	5.56971		836.547	0.60137
834.764	25.6904		834.764	20.6217		834.764	15.5837		834.764	10.5677		834.764	5.5718		834.764	0.60375
832.98	25.8017		832.98	20.5821		832.98	15.6341		832.98	10.5999		832.98	5.56947		832.98	0.59607
831.199	25.775		831.199	20.5963		831.199	15.5559		831.199	10.5586		831.199	5.63334		831.199	0.59343
829.414	25.7112		829.414	20.6141		829.414	15.5649		829.414	10.582		829.414	5.56922		829.414	0.63855
827.631	25.7163		827.631	20.693		827.631	15.5579		827.631	10.5936		827.631	5.57351		827.631	0.59066
825.846	25.8329		825.846	20.6175		825.846	15.5601		825.846	10.6288		825.846	5.54912		825.846	0.61817
824.062	25.8115		824.062	20.6532		824.062	15.6265		824.062	10.5934		824.062	5.63279		824.062	0.56779
822.277	25.6947		822.277	20.6244		822.277	15.5759		822.277	10.6079		822.277	5.57754		822.277	0.50487
820.492	25.7051		820.492	20.6314		820.492	15.6217		820.492	10.5461		820.492	5.58183		820.492	0.59768
818.705	25.8481		818.705	20.6564		818.705	15.6032		818.705	10.5871		818.705	5.60814		818.705	0.60509
816.92	25.7843		816.92	20.6419		816.92	15.5893		816.92	10.5987		816.92	5.56615		816.92	0.59742
815.133	25.7629		815.133	20.6704		815.133	15.6442		815.133	10.6045		815.133	5.56383		815.133	0.60231
813.346	25.7522		813.346	20.6918		813.346	15.6074		813.346	10.5779		813.346	5.57031		813.346	0.54698
811.559	25.7361		811.559	20.602		811.559	15.6004		811.559	10.6013		811.559	5.55258		811.559	0.58449
809.771	25.6513		809.771	20.6342		809.771	15.6209		809.771	10.6334		809.771	5.6405		809.771	0.62449
807.982	25.6776		807.982	20.6484		807.982	15.6001		807.982	10.5776		807.982	5.59195		807.982	0.58173
806.193	25.7992		806.193	20.6625		806.193	15.616		806.193	10.598		806.193	5.58302		806.193	0.66433
804.406	25.7672		804.406	20.6517		804.406	15.5335		804.406	10.5685		804.406	5.5631		804.406	0.62659
802.615	25.7459		802.615	20.5907		802.615	15.6295		802.615	10.6387		802.615	5.57397		802.615	0.56882
800.826	25.7404		800.826	20.6764		800.826	15.5607		800.826	10.6532		800.826	5.58704		800.826	0.5687
799.037	25.7985		799.037	20.6477		799.037	15.604		799.037	10.5828		799.037	5.55394		799.037	0.59613
797.246	25.7507		797.246	20.5903		797.246	15.5925		797.246	10.5593		797.246	5.59997		797.246	0.55343
795.455	25.7135		795.455	20.6617		795.455	15.5626		795.455	10.5591		795.455	5.5471		795.455	0.56583
793.664	25.6923		793.664	20.6973		793.664	15.5945		793.664	10.5561		793.664	5.62827		793.664	0.6408
791.873	25.7872		791.873	20.6507		791.873	15.5212		791.873	10.5998		791.873	5.58201		791.873	0.57059
790.08	25.6919		790.08	20.6434		790.08	15.5988		790.08	10.5851		790.08	5.54455		790.08	0.54544
788.287	25.808		788.287	20.6718		788.287	15.5484		788.287	10.5967		788.287	5.63225		788.287	0.60536
786.494	25.7392		786.494	20.6145		786.494	15.5688		786.494	10.5059		786.494	5.53554		786.494	0.56021
784.701	25.7443		784.701	20.6287		784.701	15.5779		784.701	10.5672		784.701	5.55078		784.701	0.57509
782.908	25.7494		782.908	20.6464		782.908	15.5366		782.908	10.5963		782.908	5.53092		782.908	0.55747
781.113	25.707		781.113	20.5498		781.113	15.5434		781.113	10.5494		781.113	5.55712		781.113	0.55235
779.32	25.67		779.32	20.6318		779.32	15.5592		779.32	10.523		779.32	5.58332		779.32	0.56722
777.525	25.6909		777.525	20.596		777.525	15.5523		777.525	10.5608		777.525	5.56346		777.525	0.53212
775.73	25.7488		775.73	20.6637		775.73	15.5521		775.73	10.5753		775.73	5.53922		775.73	0.58196
773.934	25.7697		773.934	20.6136		773.934	15.6182		773.934	10.581		773.934	5.57417		773.934	0.5294
772.139	25.7484		772.139	20.5992		772.139	15.5747		772.139	10.5546		772.139	5.59596		772.139	0.57172
770.342	25.743		770.342	20.6097		770.342	15.5221		770.342	10.5808		770.342	5.58487		770.342	0.53915
768.545	25.7639		768.545	20.5811		768.545	15.5973		768.545	10.5631		768.545	5.54314		768.545	0.53903
766.748	25.7848		766.748	20.5952		766.748	15.4832		766.748	10.5893		766.748	5.49923		766.748	0.53143
764.951	25.7478		764.951	20.5666		764.951	15.5605		764.951	10.5512		764.951	5.55166		764.951	0.57871
763.152	25.637		763.152	20.4952		763.152	15.5171		763.152	10.5715		763.152	5.58218		763.152	0.54866
761.355	25.7106		761.355	20.5699		761.355	15.5739		761.355	10.5306		761.355	5.50109		761.355	0.51363
759.557	25.6578		759.557	20.5377		759.557	15.501		759.557	10.513		759.557	5.56442		759.557	0.58581
757.758	25.5893		757.758	20.5376		757.758	15.5145		757.758	10.5158		757.758	5.50306		757.758	0.53833
755.957	25.6365		755.957	20.5589		755.957	15.5531		755.957	10.5361		755.957	5.53138		755.957	0.55815
754.158	25.6364		754.158	20.6548		754.158	15.5552		754.158	10.5738		754.158	5.53782		754.158	0.55304
752.357	25.6783		752.357	20.6049		752.357	15.521		752.357	10.5329		752.357	5.54645		752.357	0.54545
750.557	25.6571		750.557	20.5656		750.557	15.505		750.557	10.591		750.557	5.57255		750.557	0.5777
748.756	25.7043		748.756	20.5833		748.756	15.5367		748.756	10.5152		748.756	5.53965		748.756	0.5477
746.955	25.7199		746.955	20.5938		746.955	15.5502		746.955	10.5122		746.955	5.53517		746.955	0.55007
745.152	25.6252		745.152	20.5724		745.152	15.5342		745.152	10.5296		745.152	5.55907		745.152	0.54249
743.352	25.667		743.352	20.5687		743.352	15.5568		743.352	10.5003		743.352	5.53275		743.352	0.515
741.549	25.7037		741.549	20.533		741.549	15.5748		741.549	10.5497		741.549	5.52172		741.549	0.52733
739.746	25.6405		739.746	20.5649		739.746	15.4907		739.746	10.535		739.746	5.53252		739.746	0.51478
737.941	25.7139		737.941	20.5576		737.941	15.5519		737.941	10.5058		737.941	5.55422		737.941	0.57185
736.139	25.7399		736.139	20.6072		736.139	15.5563		736.139	10.529		736.139	5.5541		736.139	0.50213
734.334	25.724		734.334	20.5609		734.334	15.5221		734.334	10.5405		734.334	5.56053		734.334	0.54675
732.529	25.6504		732.529	20.5608		732.529	15.5629		732.529	10.5839		732.529	5.49717		732.529	0.5193
730.725	25.7237		730.725	20.5465		730.725	15.5764		730.725	10.5983		730.725	5.54938		730.725	0.53409
728.92	25.6921		728.92	20.6316		728.92	15.5354		728.92	10.5517		728.92	5.56016		728.92	0.52901
727.113	25.7077		727.113	20.5888		727.113	15.5353		727.113	10.5603		727.113	5.52517		727.113	0.52144
725.307	25.6551		725.307	20.5462		725.307	15.5647		725.307	10.5283		725.307	5.54031		725.307	0.52133
723.502	25.6288		723.502	20.5709		723.502	15.5487		723.502	10.534		723.502	5.52712		723.502	0.54356
721.693	25.6443		721.693	20.6062		721.693	15.5213		721.693	10.5745		721.693	5.57492		721.693	0.50622
719.887	25.6966		719.887	20.6096		719.887	15.5711		719.887	10.4902		719.887	5.54213		719.887	0.53091
718.08	25.665		718.08	20.5563		718.08	15.4917		718.08	10.6061		718.08	5.53548		718.08	0.50351
716.271	25.6753		716.271	20.5739		716.271	15.5323		716.271	10.5306		716.271	5.5136		716.271	0.49845
714.463	25.6019		714.463	20.5809		714.463	15.5254		714.463	10.5247		714.463	5.54831		714.463	0.50825
712.654	25.6489		712.654	20.6162		712.654	15.5072		712.654	10.5217		712.654	5.5025		712.654	0.51062
710.844	25.6592		710.844	20.5204		710.844	15.541		710.844	10.5187		710.844	5.53067		710.844	0.54521
709.035	25.6747		709.035	20.5946		709.035	15.5387		709.035	10.4664		709.035	5.52186		709.035	0.54013
707.225	25.6694		707.225	20.5839		707.225	15.5159		707.225	10.5271		707.225	5.51087		707.225	0.53754
705.414	25.6535		705.414	20.6616		705.414	15.552		705.414	10.4981		705.414	5.54988		705.414	0.52751
703.604	25.7109		703.604	20.5235		703.604	15.5541		703.604	10.5095		703.604	5.55194		703.604	0.4754
701.793	25.716		701.793	20.5906		701.793	15.5472		701.793	10.4776		701.793	5.58223		701.793	0.54956
699.98	25.6427		699.98	20.6187		699.98	15.529		699.98	10.5151		699.98	5.52346		699.98	0.51974
698.168	25.653		698.168	20.5126		698.168	15.5583		698.168	10.5439		698.168	5.5038		698.168	0.51963
696.357	25.6006		696.357	20.5407		696.357	15.5265		696.357	10.5525		696.357	5.55145		696.357	0.53436
694.543	25.6005		694.543	20.5512		694.543	15.4993		694.543	10.5784		694.543	5.5318		694.543	0.53919
692.73	25.7309		692.73	20.5228		692.73	15.5353		692.73	10.5262		692.73	5.55555		692.73	0.49951
690.916	25.7255		690.916	20.6181		690.916	15.4901		690.916	10.5116		690.916	5.49902		690.916	0.52165
689.104	25.6679		689.104	20.5756		689.104	15.5441		689.104	10.5202		689.104	5.53145		689.104	0.53884
687.289	25.6678		687.289	20.586		687.289	15.5169		687.289	10.5114		687.289	5.4988		687.289	0.52389
685.475	25.6311		685.475	20.5577		685.475	15.501		685.475	10.5518		685.475	5.52471		685.475	0.51637
683.658	25.7144		683.658	20.5752		683.658	15.4964		683.658	10.5141		683.658	5.55928		683.658	0.52119
681.844	25.6986		681.844	20.5116		681.844	15.5414		681.844	10.488		681.844	5.55049		681.844	0.47663
680.027	25.5681		680.027	20.5714		680.027	15.5097		680.027	10.4734		680.027	5.53304		680.027	0.5185
678.211	25.6045		678.211	20.5431		678.211	15.5006		678.211	10.5426		678.211	5.52642		678.211	0.49864
676.395	25.6461		676.395	20.5359		676.395	15.4915		676.395	10.5887		676.395	5.46566		676.395	0.48866
674.576	25.5678		674.576	20.5358		674.576	15.5139		674.576	10.577		674.576	5.48072		674.576	0.47868
672.76	25.6302		672.76	20.5216		672.76	15.5115		672.76	10.4932		672.76	5.48927		672.76	0.49091
670.941	25.5831		670.941	20.5778		670.941	15.5046		670.941	10.5393		670.941	5.48267		670.941	0.49574
669.123	25.6143		669.123	20.5601		669.123	15.5361		669.123	10.4901		669.123	5.55614		669.123	0.50056
667.305	25.6558		667.305	20.5248		667.305	15.4887		667.305	10.4468		667.305	5.47597		667.305	0.42156
665.484	25.6088		665.484	20.5246		665.484	15.4863		665.484	10.4841		665.484	5.47371		665.484	0.50527
663.666	25.5722		663.666	20.5351		663.666	15.4659		663.666	10.5273		663.666	5.51037		663.666	0.54705
661.846	25.6501		661.846	20.5314		661.846	15.4591		661.846	10.4638		661.846	5.49728		661.846	0.4878
660.025	25.6292		660.025	20.5067		660.025	15.5062		660.025	10.504		660.025	5.51014		660.025	0.49755
658.205	25.5719		658.205	20.5629		658.205	15.4791		658.205	10.5327		658.205	5.47545		658.205	0.47774
656.383	25.5717		656.383	20.4959		656.383	15.506		656.383	10.452		656.383	5.46671		656.383	0.51949
654.562	25.6132		654.562	20.5239		654.562	15.4227		654.562	10.4663		654.562	5.52061		654.562	0.47261
652.74	25.6338		652.74	20.552		652.74	15.5283		652.74	10.4978		652.74	5.48594		652.74	0.43559
650.918	25.5298		650.918	20.4605		650.918	15.4495		650.918	10.4315		650.918	5.45776		650.918	0.48963
649.096	25.6024		649.096	20.5587		649.096	15.4786		649.096	10.4774		649.096	5.4663		649.096	0.46492
647.271	25.5659		647.271	20.5024		647.271	15.4785		647.271	10.5003		647.271	5.51152		647.271	0.48695
645.449	25.5191		645.449	20.4812		645.449	15.5166		645.449	10.5175		645.449	5.45746		645.449	0.51635
643.625	25.5138		643.625	20.4636		643.625	15.5053		643.625	10.4685		643.625	5.47462		643.625	0.4597
641.801	25.5656		641.801	20.4775		641.801	15.4602		641.801	10.4512		641.801	5.48315		641.801	0.46206
639.975	25.5602		639.975	20.5406		639.975	15.4354		639.975	10.5028		639.975	5.45932		639.975	0.54058
638.15	25.6327		638.15	20.5124		638.15	15.4488		638.15	10.4998		638.15	5.46784		638.15	0.48642
636.324	25.5444		636.324	20.5649		636.324	15.4465		636.324	10.4738		636.324	5.52163		636.324	0.4814
634.498	25.6117		634.498	20.5227		634.498	15.4509		634.498	10.4766		634.498	5.47411		634.498	0.47147
632.672	25.5701		632.672	20.5156		632.672	15.4642		632.672	10.4621		632.672	5.44815		632.672	0.50083
630.846	25.5544		630.846	20.4944		630.846	15.4776		630.846	10.4936		630.846	5.44589		630.846	0.47127
629.02	25.4973		629.02	20.5434		629.02	15.4237		629.02	10.4619		629.02	5.49748		629.02	0.4638
627.191	25.5853		627.191	20.5012		627.191	15.4886		627.191	10.4446		627.191	5.41556		627.191	0.43917
625.363	25.6007		625.363	20.4976		625.363	15.4885		625.363	10.4532		625.363	5.45637		625.363	0.44152
623.535	25.4815		623.535	20.473		623.535	15.4906		623.535	10.4473		623.535	5.4864		623.535	0.45859
621.707	25.5694		621.707	20.5009		621.707	15.4883		621.707	10.4644		621.707	5.46262		621.707	0.4634
619.877	25.5434		619.877	20.5288		619.877	15.4814		619.877	10.4958		619.877	5.50554		619.877	0.41672
618.047	25.5433		618.047	20.4727		618.047	15.4544		618.047	10.5072		618.047	5.48393		618.047	0.4681
616.219	25.5845		616.219	20.49		616.219	15.4611		616.219	10.467		616.219	5.40641		616.219	0.45329
614.387	25.6413		614.387	20.4969		614.387	15.4475		614.387	10.421		614.387	5.49016		614.387	0.45564
612.557	25.5946		612.557	20.4583		612.557	15.443		612.557	10.4267		612.557	5.52445		612.557	0.44575
610.727	25.5738		610.727	20.5002		610.727	15.4697		610.727	10.4352		610.727	5.42548		610.727	0.41871
608.895	25.4961		608.895	20.577		608.895	15.4338		608.895	10.4666		608.895	5.43613		608.895	0.48717
607.062	25.4909		607.062	20.4545		607.062	15.4561		607.062	10.435		607.062	5.44678		607.062	0.43566
605.23	25.4804		605.23	20.4999		605.23	15.4962		605.23	10.4492		605.23	5.47245		605.23	0.42578
603.396	25.563		603.396	20.5103		603.396	15.4425		603.396	10.4148		603.396	5.43799		603.396	0.41835
601.564	25.5215		601.564	20.4822		601.564	15.4558		601.564	10.4547		601.564	5.48083		601.564	0.48185
599.73	25.4388		599.73	20.4332		599.73	15.449		599.73	10.4689		599.73	5.40776		599.73	0.44506
597.896	25.5832		597.896	20.461		597.896	15.4556		597.896	10.4717		597.896	5.42054		597.896	0.4303
596.062	25.6141		596.062	20.4784		596.062	15.4778		596.062	10.4658		596.062	5.40543		596.062	0.46687
594.229	25.5262		594.229	20.4888		594.229	15.4442		594.229	10.46		594.229	5.46754		594.229	0.42766
592.393	25.4745		592.393	20.4782		592.393	15.4397		592.393	10.3428		592.393	5.40525		592.393	0.40802
590.557	25.5105		590.557	20.4641		590.557	15.4619		590.557	10.4199		590.557	5.45018		590.557	0.44702
588.721	25.5774		588.721	20.4361		588.721	15.4863		588.721	10.454		588.721	5.42651		588.721	0.4225
586.885	25.4691		586.885	20.4848		586.885	15.4505		586.885	10.4568		586.885	5.43284		586.885	0.41508
585.049	25.5154		585.049	20.4603		585.049	15.4148		585.049	10.4167		585.049	5.48202		585.049	0.41743
583.211	25.4998		583.211	20.4219		583.211	15.4102		583.211	10.4223		583.211	5.43694		583.211	0.43686
581.373	25.5254		581.373	20.5054		581.373	15.4525		581.373	10.4108		581.373	5.43684		581.373	0.39041
579.535	25.5253		579.535	20.4496		579.535	15.4145		579.535	10.4592		579.535	5.43889		579.535	0.44643
577.697	25.6333		577.697	20.4564		577.697	15.4144		577.697	10.4705		577.697	5.41525		577.697	0.43658
575.859	25.4993		575.859	20.533		575.859	15.4099		575.859	10.4818		575.859	5.46437		575.859	0.39747
574.02	25.5661		574.02	20.4562		574.02	15.4142		574.02	10.4589		574.02	5.41292		574.02	0.46808
572.18	25.4991		572.18	20.4352		572.18	15.423		572.18	10.4759		572.18	5.40642		572.18	0.45335
570.34	25.4527		570.34	20.4595		570.34	15.4185		570.34	10.4131		570.34	5.42771		570.34	0.40939
568.5	25.4629		568.5	20.4246		568.5	15.4139		568.5	10.433		568.5	5.41051		568.5	0.41661
566.658	25.4834		566.658	20.4558		566.658	15.4628		566.658	10.4016		566.658	5.42111		566.658	0.436
564.818	25.4319		564.818	20.4244		564.818	15.4271		564.818	10.4243		564.818	5.42316		564.818	0.41155
562.977	25.4986		562.977	20.4487		562.977	15.4604		562.977	10.4242		562.977	5.39742		562.977	0.38955
561.135	25.4882		561.135	20.4521		561.135	15.4336		561.135	10.4611		561.135	5.41656		561.135	0.40651
559.291	25.524		559.291	20.4728		559.291	15.4513		559.291	10.4183		559.291	5.42501		559.291	0.42345
557.449	25.5445		557.449	20.4484		557.449	15.4601		557.449	10.4609		557.449	5.43773		557.449	0.45499
555.605	25.5238		555.605	20.4726		555.605	15.4111		555.605	10.4579		555.605	5.42696		555.605	0.42327
553.762	25.5288		553.762	20.4517		553.762	15.4177		553.762	10.4294		553.762	5.4162		553.762	0.42317
551.918	25.5749		551.918	20.4585		551.918	15.4131		551.918	10.4236		551.918	5.40757		551.918	0.45226
550.074	25.5081		550.074	20.4167		550.074	15.4419		550.074	10.4349		550.074	5.43948		550.074	0.4084
548.229	25.5388		548.229	20.4653		548.229	15.424		548.229	10.4348		548.229	5.40526		548.229	0.46664
546.383	25.5489		546.383	20.4964		546.383	15.4506		546.383	10.4319		546.383	5.43929		546.383	0.41308
544.537	25.4411		544.537	20.4859		544.537	15.4616		544.537	10.4545		544.537	5.45838		544.537	0.41056
542.691	25.5281		542.691	20.406		542.691	15.4238		542.691	10.3862		542.691	5.39433		542.691	0.42504
540.846	25.4921		540.846	20.4926		540.846	15.488		540.846	10.4287		540.846	5.45179		540.846	0.42009
538.998	25.5382		538.998	20.4994		538.998	15.4413		538.998	10.4712		538.998	5.43038		538.998	0.41515
537.152	25.4817		537.152	20.4438		537.152	15.4279		537.152	10.403		537.152	5.44094		537.152	0.46603
535.305	25.5789		535.305	20.4611		535.305	15.4256		535.305	10.4398		535.305	5.43871		535.305	0.43195
533.455	25.4405		533.455	20.409		533.455	15.4233		533.455	10.4284		533.455	5.3939		533.455	0.44399
531.607	25.5274		531.607	20.4435		531.607	15.401		531.607	10.3857		531.607	5.42787		531.607	0.44146
529.758	25.5376		529.758	20.4954		529.758	15.4519		529.758	10.4452		529.758	5.40437		529.758	0.43167
527.908	25.476		527.908	20.4468		527.908	15.4208		527.908	10.516		527.908	5.40641		527.908	0.434
526.059	25.4554		526.059	20.4744		526.059	15.3831		526.059	10.3968		526.059	5.42334		526.059	0.4339
524.209	25.6242		524.209	20.4397		524.209	15.4295		524.209	10.4165		524.209	5.43813		524.209	0.41926
522.359	25.5422		522.359	20.4881		522.359	15.4493		522.359	10.4108		522.359	5.39338		522.359	0.45067
520.508	25.5012		520.508	20.481		520.508	15.385		520.508	10.4588		520.508	5.4507		520.508	0.42877
518.656	25.5011		518.656	20.4913		518.656	15.4071		518.656	10.4644		518.656	5.38471		518.656	0.39235
516.805	25.5878		516.805	20.3943		516.805	15.3937		516.805	10.3964		516.805	5.425		516.805	0.45037
514.953	25.5059		514.953	20.4669		514.953	15.4246		514.953	10.4161		514.953	5.42065		514.953	0.37765
513.1	25.4956		513.1	20.4149		513.1	15.4178		513.1	10.4386		513.1	5.4418		513.1	0.39209
511.248	25.5262		511.248	20.4598		511.248	15.4067		511.248	10.447		511.248	5.45445		511.248	0.41378
509.395	25.4852		509.395	20.4286		509.395	15.3867		509.395	10.3677		509.395	5.43312		509.395	0.43788
507.541	25.4953		507.541	20.4319		507.541	15.422		507.541	10.3959		507.541	5.43727		507.541	0.40392
505.686	25.4952		505.686	20.494		505.686	15.3954		505.686	10.4609		505.686	5.38199		505.686	0.45945
503.832	25.5512		503.832	20.4524		503.832	15.3887		503.832	10.3957		503.832	5.43495		503.832	0.42792
501.977	25.5868		501.977	20.4627		501.977	15.435		501.977	10.4126		501.977	5.39667		501.977	0.43508
500.121	25.5153		500.121	20.4764		500.121	15.4018		500.121	10.4493		500.121	5.41991		500.121	0.43982
498.266	25.5305		498.266	20.4452		498.266	15.3862		498.266	10.4068		498.266	5.43679		498.266	0.41798
496.41	25.5354		496.41	20.4417		496.41	15.4832		496.41	10.4321		496.41	5.42609		496.41	0.43721
494.553	25.4792		494.553	20.4485		494.553	15.45		494.553	10.4179		494.553	5.41964		494.553	0.45885
492.695	25.4791		492.695	20.5001		492.695	15.4367		492.695	10.4573		492.695	5.43226		492.695	0.46599
490.838	25.5708		490.838	20.4483		490.838	15.4145		490.838	10.4149		490.838	5.45123		490.838	0.41278
488.98	25.5502		488.98	20.4654		488.98	15.4233		488.98	10.4205		488.98	5.42571		488.98	0.46096
487.121	25.4381		487.121	20.5377		487.121	15.4144		487.121	10.3865		487.121	5.40021		487.121	0.45362
485.264	25.5704		485.264	20.5066		485.264	15.4517		485.264	10.4287		485.264	5.44035		485.264	0.46075
483.404	25.5703		483.404	20.4066		483.404	15.4164		483.404	10.4004		483.404	5.44448		483.404	0.43895
481.545	25.5447		481.545	20.4719		481.545	15.4405		481.545	10.3834		481.545	5.42957		481.545	0.39304
479.686	25.5446		479.686	20.5063		479.686	15.3788		479.686	10.4256		479.686	5.42101		479.686	0.41947
477.824	25.5343		477.824	20.4648		477.824	15.4293		477.824	10.4086		477.824	5.45053		477.824	0.43866
475.965	25.5189		475.965	20.5129		475.965	15.4248		475.965	10.4226		475.965	5.43563		475.965	0.4482
474.104	25.4984		474.104	20.4233		474.104	15.4555		474.104	10.4		474.104	5.42496		474.104	0.39028
472.242	25.4983		472.242	20.4611		472.242	15.4334		472.242	10.4703		472.242	5.43333		472.242	0.44318
470.379	25.5999		470.379	20.4506		470.379	15.4377		470.379	10.4223		470.379	5.46493		470.379	0.42382
468.518	25.5743		468.518	20.4574		468.518	15.431		468.518	10.4335		468.518	5.44581		468.518	0.4165
466.654	25.5793		466.654	20.4814		466.654	15.4375		466.654	10.4334		466.654	5.44783		466.654	0.39234
464.791	25.5385		464.791	20.4435		464.791	15.4199		464.791	10.4474		464.791	5.44139		464.791	0.43317
462.928	25.5028		462.928	20.4537		462.928	15.4637		462.928	10.4782		462.928	5.44763		462.928	0.4451
461.064	25.5231		461.064	20.4673		461.064	15.4592		461.064	10.45		461.064	5.4222		461.064	0.38968
459.199	25.5128		459.199	20.4398		459.199	15.435		459.199	10.4246		459.199	5.48331		459.199	0.42326
457.334	25.4924		457.334	20.419		457.334	15.4327		457.334	10.4807		457.334	5.4199		457.334	0.43519
455.469	25.5379		455.469	20.4636		455.469	15.426		455.469	10.4441		455.469	5.40504		455.469	0.44471
453.604	25.5835		453.604	20.4429		453.604	15.4215		453.604	10.4271		453.604	5.42183		453.604	0.44701
451.738	25.487		451.738	20.4634		451.738	15.4017		451.738	10.5141		451.738	5.4133		451.738	0.42048
449.871	25.5578		449.871	20.4839		449.871	15.4213		449.871	10.4017		449.871	5.40056		449.871	0.41078
448.004	25.4969		448.004	20.5044		448.004	15.4563		448.004	10.4212		448.004	5.41733		448.004	0.37707
446.137	25.5779		446.137	20.4768		446.137	15.4321		446.137	10.4548		446.137	5.45096		446.137	0.35297
444.27	25.4967		444.27	20.4458		444.27	15.4232		444.27	10.4098		444.27	5.41293		444.27	0.3769
442.4	25.5624		442.4	20.4629		442.4	15.4034		442.4	10.4434		442.4	5.44865		442.4	0.43202
440.533	25.4762		440.533	20.5416		440.533	15.4384		440.533	10.4152		440.533	5.45276		440.533	0.39353
438.664	25.5115		438.664	20.5072		438.664	15.3879		438.664	10.432		438.664	5.41477		438.664	0.42223
436.795	25.476		436.795	20.4763		436.795	15.4119		436.795	10.4431		436.795	5.44414		436.795	0.41734
434.924	25.4911		434.924	20.4453		434.924	15.3724		434.924	10.4318		434.924	5.41248		434.924	0.44603
433.055	25.5669		433.055	20.4761		433.055	15.3986		433.055	10.398		433.055	5.40187		433.055	0.42675
431.184	25.5718		431.184	20.4657		431.184	15.3985		431.184	10.4708		431.184	5.46068		431.184	0.46261
429.312	25.4806		429.312	20.5135		429.312	15.4356		429.312	10.4203		429.312	5.42062		429.312	0.4002
427.441	25.5614		427.441	20.51		427.441	15.429		427.441	10.4538		427.441	5.47099		427.441	0.42407
425.57	25.4602		425.57	20.462		425.57	15.4201		425.57	10.4537		425.57	5.44776		425.57	0.39284
423.697	25.546		423.697	20.5132		423.697	15.4113		423.697	10.4368		423.697	5.42454		423.697	0.45262
421.824	25.5611		421.824	20.496		421.824	15.4287		421.824	10.4535		421.824	5.39503		421.824	0.42379
419.951	25.5761		419.951	20.4582		419.951	15.3914		419.951	10.4618		419.951	5.44326		419.951	0.44524
418.078	25.5153		418.078	20.4923		418.078	15.3869		418.078	10.4589		418.078	5.42636		418.078	0.42121
416.205	25.4546		416.205	20.4991		416.205	15.3934		416.205	10.4308		416.205	5.39897		416.205	0.38762
414.33	25.6565		414.33	20.4853		414.33	15.437		414.33	10.4531		414.33	5.46396		414.33	0.41145
412.455	25.5756		412.455	20.4852		412.455	15.4042		412.455	10.4502		412.455	5.46176		412.455	0.39223
410.58	25.5704		410.58	20.5055		410.58	15.3757		410.58	10.4669		410.58	5.44697		410.58	0.41845
408.705	25.5249		408.705	20.4713		408.705	15.4302		408.705	10.4696		408.705	5.42799		408.705	0.39445
406.828	25.4793		406.828	20.4609		406.828	15.4563		406.828	10.422		406.828	5.45516		406.828	0.41826
404.951	25.5448		404.951	20.4745		404.951	15.4104		404.951	10.4582		404.951	5.41522		404.951	0.44206
403.076	25.5497		403.076	20.4539		403.076	15.4124		403.076	10.4022		403.076	5.44448		403.076	0.42763
401.197	25.5345		401.197	20.4675		401.197	15.4407		401.197	10.4412		401.197	5.49049		401.197	0.41798
399.32	25.5697		399.32	20.4094		399.32	15.4166		399.32	10.4356		399.32	5.42542		399.32	0.41789
397.443	25.5393		397.443	20.4775		397.443	15.4187		397.443	10.4578		397.443	5.40856		397.443	0.43929
395.564	25.5795		395.564	20.4978		395.564	15.4339		395.564	10.4717		395.564	5.43152		395.564	0.42248
393.686	25.6449		393.686	20.4671		393.686	15.3989		393.686	10.452		393.686	5.41257		393.686	0.42716
391.807	25.5641		391.807	20.4942		391.807	15.4119		391.807	10.4017		391.807	5.47739		391.807	0.44377
389.926	25.5791		389.926	20.46		389.926	15.4271		389.926	10.449		389.926	5.41448		389.926	0.42697
388.047	25.5739		388.047	20.4327		388.047	15.4248		388.047	10.4601		388.047	5.43951		388.047	0.39826
386.166	25.5587		386.166	20.4973		386.166	15.4487		386.166	10.4126		386.166	5.41221		386.166	0.42678
384.285	25.5586		384.285	20.4767		384.285	15.4464		384.285	10.432		384.285	5.43722		384.285	0.36948
382.402	25.5132		382.402	20.4766		382.402	15.4332		382.402	10.4486		382.402	5.48732		382.402	0.40514
380.521	25.6338		380.521	20.4289		380.521	15.3548		380.521	10.4402		380.521	5.45794		380.521	0.43603
378.639	25.6035		378.639	20.4594		378.639	15.4178		378.639	10.4484		378.639	5.41811		378.639	0.4264
376.756	25.5883		376.756	20.5274		376.756	15.4677		376.756	10.4205		376.756	5.43265		376.756	0.45251
374.873	25.5479		374.873	20.4694		374.873	15.4198		374.873	10.426		374.873	5.43047		374.873	0.42145
372.99	25.5679		372.99	20.4999		372.99	15.4023		372.99	10.462		372.99	5.43037		372.99	0.38327
371.105	25.6381		371.105	20.544		371.105	15.4239		371.105	10.4452		371.105	5.44072		371.105	0.44745
369.223	25.5224		369.223	20.4283		369.223	15.4325		369.223	10.4257		369.223	5.45524		369.223	0.42355
367.338	25.5575		367.338	20.5166		367.338	15.4455		367.338	10.4367		367.338	5.43426		367.338	0.3735
365.451	25.5373		365.451	20.4519		365.451	15.3954		365.451	10.4283		365.451	5.41538		365.451	0.36153
363.566	25.4769		363.566	20.462		363.566	15.4344		363.566	10.4754		363.566	5.43407		363.566	0.43992
361.68	25.5872		361.68	20.4653		361.68	15.4126		361.68	10.4281		361.68	5.4298		361.68	0.39465
359.795	25.552		359.795	20.4856		359.795	15.4321		359.795	10.4335		359.795	5.42553		359.795	0.41833
357.908	25.612		357.908	20.4855		357.908	15.432		357.908	10.4307		357.908	5.49843		357.908	0.40636
356.02	25.6119		356.02	20.4989		356.02	15.3971		356.02	10.425		356.02	5.44411		356.02	0.40864
354.133	25.5817		354.133	20.4751		354.133	15.4318		354.133	10.4666		354.133	5.39815		354.133	0.37767
352.244	25.6116		352.244	20.4749		352.244	15.4447		352.244	10.4637		352.244	5.4585		352.244	0.41083
350.355	25.6265		350.355	20.4409		350.355	15.4056		350.355	10.4108		350.355	5.43965		350.355	0.42974
348.467	25.5713		348.467	20.5154		348.467	15.4271		348.467	10.4385		348.467	5.3958		348.467	0.41065
346.578	25.521		346.578	20.4882		346.578	15.3967		346.578	10.4551		346.578	5.41029		346.578	0.42717
344.688	25.4859		344.688	20.4881		344.688	15.4465		344.688	10.4411		344.688	5.44144		344.688	0.4342
342.799	25.661		342.799	20.488		342.799	15.4334		342.799	10.502		342.799	5.44342		342.799	0.43173
340.908	25.5958		340.908	20.4777		340.908	15.4398		340.908	10.4714		340.908	5.45789		340.908	0.45061
339.016	25.5606		339.016	20.4708		339.016	15.4353		339.016	10.4879		339.016	5.45987		339.016	0.3936
337.125	25.5255		337.125	20.5012		337.125	15.3638		337.125	10.413		337.125	5.414		337.125	0.41959
335.232	25.5304		335.232	20.4537		335.232	15.4308		335.232	10.4628		335.232	5.41391		335.232	0.36972
333.342	25.5803		333.342	20.5247		333.342	15.4675		333.342	10.471		333.342	5.45748		333.342	0.40519
331.449	25.6101		331.449	20.4806		331.449	15.4263		331.449	10.4847		331.449	5.46154		331.449	0.46432
329.555	25.59		329.555	20.5244		329.555	15.4002		329.555	10.4569		329.555	5.45105		329.555	0.43343
327.662	25.5799		327.662	20.4804		327.662	15.4218		327.662	10.4541		327.662	5.49251		327.662	0.38834
325.768	25.5947		325.768	20.4769		325.768	15.3914		325.768	10.4623		325.768	5.42176		325.768	0.38115
323.873	25.6146		323.873	20.5038		323.873	15.4021		323.873	10.4539		323.873	5.43828		323.873	0.4213
321.979	25.6694		321.979	20.4834		321.979	15.4215		321.979	10.4565		321.979	5.43195		321.979	0.42358
320.084	25.7192		320.084	20.4698		320.084	15.4236		320.084	10.4426		320.084	5.42148		320.084	0.44241
318.188	25.5942		318.188	20.5102		318.188	15.4624		318.188	10.5061		318.188	5.4629		318.188	0.4565
316.291	25.634		316.291	20.473		316.291	15.4558		316.291	10.4756		316.291	5.47732		316.291	0.40438
314.395	25.584		314.395	20.4762		314.395	15.4449		314.395	10.4395		314.395	5.47307		314.395	0.43266
312.498	25.5689		312.498	20.5065		312.498	15.4102		312.498	10.5223		312.498	5.48126		312.498	0.42074
310.602	25.5338		310.602	20.5064		310.602	15.4166		310.602	10.4393		310.602	5.4376		310.602	0.45137
308.703	25.5836		308.703	20.4489		308.703	15.3971		308.703	10.4448		308.703	5.44995		308.703	0.37567
306.805	25.6682		306.805	20.5197		306.805	15.4272		306.805	10.4529		306.805	5.4996		306.805	0.38031
304.906	25.5185		304.906	20.5196		304.906	15.4314		304.906	10.4197		304.906	5.41658		304.906	0.47705
303.008	25.653		303.008	20.5397		303.008	15.4637		303.008	10.4555		303.008	5.44965		303.008	0.41319
301.109	25.5831		301.109	20.5058		301.109	15.4528		301.109	10.4527		301.109	5.47441		301.109	0.38005
299.209	25.6278		299.209	20.5023		299.209	15.4484		299.209	10.4664		299.209	5.43288		299.209	0.40357
297.309	25.7073		297.309	20.509		297.309	15.4375		297.309	10.4883		297.309	5.41828		297.309	0.41764
295.408	25.6773		295.408	20.5257		295.408	15.4008		295.408	10.491		295.408	5.41198		295.408	0.44113
293.506	25.6622		293.506	20.529		293.506	15.4007		293.506	10.4522		293.506	5.44915		293.506	0.39151
291.605	25.5973		291.605	20.5053		291.605	15.4157		291.605	10.3805		291.605	5.44077		291.605	0.41972
289.703	25.6022		289.703	20.4748		289.703	15.4565		289.703	10.5154		289.703	5.48619		289.703	0.43848
287.801	25.6269		287.801	20.532		287.801	15.4457		287.801	10.463		287.801	5.43644		287.801	0.46431
285.898	25.5074		285.898	20.5049		285.898	15.4434		285.898	10.4794		285.898	5.47977		285.898	0.44771
283.994	25.6416		283.994	20.4813		283.994	15.4368		283.994	10.4132		283.994	5.45071		283.994	0.38872
282.092	25.5718		282.092	20.5552		282.092	15.4475		282.092	10.4627		282.092	5.44648		282.092	0.41689
280.188	25.5916		280.188	20.4945		280.188	15.3936		280.188	10.4763		280.188	5.49804		280.188	0.40738
278.283	25.6809		278.283	20.4843		278.283	15.4473		278.283	10.4625		278.283	5.47314		278.283	0.42142
276.377	25.6658		276.377	20.5548		276.377	15.473		276.377	10.5146		276.377	5.48336		276.377	0.40955
274.473	25.7005		274.473	20.5446		274.473	15.4385		274.473	10.5063		274.473	5.47087		274.473	0.44712
272.566	25.7401		272.566	20.4907		272.566	15.4341		272.566	10.4952		272.566	5.43979		272.566	0.38114
270.66	25.6654		270.66	20.578		270.66	15.4383		270.66	10.4538		270.66	5.45827		270.66	0.41399
268.754	25.6305		268.754	20.5106		268.754	15.4554		268.754	10.4839		268.754	5.45198		268.754	0.39978
266.848	25.6701		266.848	20.5072		266.848	15.4489		266.848	10.4811		266.848	5.43124		266.848	0.43966
264.939	25.6203		264.939	20.46		264.939	15.4552		264.939	10.4645		264.939	5.50128		264.939	0.41606
263.031	25.6301		263.031	20.5069		263.031	15.4809		263.031	10.4754		263.031	5.48055		263.031	0.46297
261.123	25.63		261.123	20.5135		261.123	15.4271		261.123	10.4615		261.123	5.47838		261.123	0.42527
259.215	25.5802		259.215	20.5067		259.215	15.4678		259.215	10.4614		259.215	5.4824		259.215	0.40639
257.305	25.6495		257.305	20.5402		257.305	15.4612		257.305	10.4558		257.305	5.42252		257.305	0.41804
255.396	25.684		255.396	20.4998		255.396	15.4247		255.396	10.4722		255.396	5.45539		255.396	0.44847
253.486	25.6195		253.486	20.4729		253.486	15.4632		253.486	10.4776		253.486	5.44293		253.486	0.43898
251.576	25.654		251.576	20.5297		251.576	15.4609		251.576	10.4308		251.576	5.48815		251.576	0.37786
249.664	25.6985		249.664	20.5598		249.664	15.4694		249.664	10.4472		249.664	5.44685		249.664	0.39655
247.754	25.7132		247.754	20.5161		247.754	15.4243		247.754	10.5157		247.754	5.47352		247.754	0.43634
245.842	25.5892		245.842	20.4925		245.842	15.4413		245.842	10.4662		245.842	5.44254		245.842	0.37995
243.93	25.6039		243.93	20.5695		243.93	15.4348		243.93	10.4442		243.93	5.48565		243.93	0.40566
242.018	25.6335		242.018	20.5057		242.018	15.4304		242.018	10.4413		242.018	5.4444		242.018	0.38916
240.104	25.5789		240.104	20.5056		240.104	15.4132		240.104	10.422		240.104	5.46281		240.104	0.39845
238.191	25.7322		238.191	20.5323		238.191	15.4538		238.191	10.4247		238.191	5.46271		238.191	0.40305
236.277	25.6133		236.277	20.5054		236.277	15.4473		236.277	10.4794		236.277	5.45232		236.277	0.40296
234.363	25.6725		234.363	20.5053		234.363	15.4215		234.363	10.4026		234.363	5.45222		234.363	0.41458
232.447	25.5833		232.447	20.5219		232.447	15.4107		232.447	10.4518		232.447	5.4439		232.447	0.39107
230.533	25.5733		230.533	20.505		230.533	15.4149		230.533	10.4298		230.533	5.46435		230.533	0.41205
228.617	25.6819		228.617	20.5049		228.617	15.4041		228.617	10.4269		228.617	5.43138		228.617	0.41664
226.701	25.5978		226.701	20.5082		226.701	15.404		226.701	10.5226		226.701	5.4703		226.701	0.40719
224.785	25.647		224.785	20.4713		224.785	15.4445		224.785	10.4678		224.785	5.4743		224.785	0.37668
222.867	25.6321		222.867	20.4812		222.867	15.406		222.867	10.4485		222.867	5.46188		222.867	0.41169
220.951	25.5826		220.951	20.5412		220.951	15.3995		220.951	10.4566		220.951	5.45357		220.951	0.3999
219.033	25.6071		219.033	20.4543		219.033	15.4314		219.033	10.4374		219.033	5.43295		219.033	0.39514
217.115	25.6267		217.115	20.4708		217.115	15.4078		217.115	10.4592		217.115	5.46978		217.115	0.43946
215.197	25.6118		215.197	20.5275		215.197	15.4206		215.197	10.4645		215.197	5.48198		215.197	0.34588
213.277	25.6511		213.277	20.4973		213.277	15.4162		213.277	10.4808		213.277	5.47982		213.277	0.41123
211.357	25.5523		211.357	20.4839		211.357	15.3649		211.357	10.4507		211.357	5.43256		211.357	0.39011
209.438	25.6459		209.438	20.4671		209.438	15.4437		209.438	10.4642		209.438	5.45091		209.438	0.43206
207.518	25.6063		207.518	20.4937		207.518	15.4543		207.518	10.4423		207.518	5.43237		207.518	0.38293
205.598	25.5372		205.598	20.4936		205.598	15.4179		205.598	10.4176		205.598	5.43023		205.598	0.39919
203.676	25.5962		203.676	20.4468		203.676	15.4498		203.676	10.4885		203.676	5.46905		203.676	0.4061
201.754	25.5813		201.754	20.48		201.754	15.4412		201.754	10.4392		201.754	5.48328		201.754	0.39201
199.832	25.6205		199.832	20.4732		199.832	15.3964		199.832	10.4937		199.832	5.45655		199.832	0.42925
197.91	25.6696		197.91	20.4631		197.91	15.4304		197.91	10.4336		197.91	5.4237		197.91	0.41516
195.988	25.6449		195.988	20.573		195.988	15.4239		195.988	10.4335		195.988	5.46863		195.988	0.40341
194.064	25.6054		194.064	20.5162		194.064	15.3982		194.064	10.4198		194.064	5.46034		194.064	0.38
192.141	25.6889		192.141	20.5427		192.141	15.396		192.141	10.3761		192.141	5.43773		192.141	0.3939
190.217	25.6887		190.217	20.546		190.217	15.4044		190.217	10.4659		190.217	5.44173		190.217	0.41013
188.293	25.5607		188.293	20.4793		188.293	15.4001		188.293	10.4522		188.293	5.48865		188.293	0.43333
186.367	25.6638		186.367	20.5058		186.367	15.4362		186.367	10.4494		186.367	5.44357		186.367	0.38432
184.441	25.6293		184.441	20.4923		184.441	15.4361		184.441	10.4193		184.441	5.42917		184.441	0.41917
182.516	25.634		182.516	20.5388		182.516	15.4041		182.516	10.4138		182.516	5.49241		182.516	0.37717
180.59	25.6093		180.59	20.5287		180.59	15.4253		180.59	10.4545		180.59	5.44123		180.59	0.36079
178.662	25.6288		178.662	20.4255		178.662	15.4762		178.662	10.4217		178.662	5.4493		178.662	0.40492
176.736	25.6582		176.736	20.4986		176.736	15.4017		176.736	10.5033		176.736	5.46962		176.736	0.39785
174.809	25.7219		174.809	20.4885		174.809	15.3846		174.809	10.4624		174.809	5.50422		174.809	0.43265
172.881	25.6382		172.881	20.5083		172.881	15.4334		172.881	10.4731		172.881	5.46737		172.881	0.43488
170.951	25.5939		170.951	20.4982		170.951	15.429		170.951	10.473		170.951	5.45911		170.951	0.39758
169.023	25.5938		169.023	20.4716		169.023	15.4332		169.023	10.4919		169.023	5.4896		169.023	0.40912
167.094	25.6722		167.094	20.5212		167.094	15.4649		167.094	10.4321		167.094	5.47318		167.094	0.39741
165.164	25.6524		165.164	20.5709		165.164	15.4181		165.164	10.4673		165.164	5.4588		165.164	0.40661
163.234	25.6473		163.234	20.4779		163.234	15.4265		163.234	10.3993		163.234	5.475		163.234	0.4042
161.303	25.6913		161.303	20.4811		161.303	15.4349		161.303	10.4318		161.303	5.46878		161.303	0.37856
159.373	25.7108		159.373	20.5274		159.373	15.4136		159.373	10.467		159.373	5.49313		159.373	0.39705
157.441	25.6665		157.441	20.587		157.441	15.4856		157.441	10.4533		157.441	5.44005		157.441	0.41089
155.51	25.7644		155.51	20.5703		155.51	15.4537		155.51	10.4288		155.51	5.50106		155.51	0.45258
153.576	25.6515		153.576	20.5403		153.576	15.4578		153.576	10.4992		153.576	5.49484		153.576	0.43855
151.645	25.6856		151.645	20.5004		151.645	15.4577		151.645	10.4937		151.645	5.5049		151.645	0.44541
149.711	25.6218		149.711	20.5069		149.711	15.4364		149.711	10.4746		149.711	5.49054		149.711	0.41748
147.777	25.6853		147.777	20.5499		147.777	15.4448		147.777	10.4175		147.777	5.48636		147.777	0.39188
145.844	25.6607		145.844	20.5895		145.844	15.4934		145.844	10.5042		145.844	5.5005		145.844	0.42889
143.908	25.7291		143.908	20.5795		143.908	15.4658		143.908	10.4797		143.908	5.50242		143.908	0.44733
141.975	25.7436		141.975	20.5926		141.975	15.4847		141.975	10.5256		141.975	5.50231		141.975	0.43565
140.039	25.8706		140.039	20.5726		140.039	15.455		140.039	10.5553		140.039	5.55099		140.039	0.45408
138.104	25.7139		138.104	20.5427		138.104	15.4909		138.104	10.455		138.104	5.48582		138.104	0.44935
136.166	25.704		136.166	20.5657		136.166	15.5034		136.166	10.574		136.166	5.48774		136.166	0.46314
134.23	25.8114		134.23	20.5854		134.23	15.4843		134.23	10.5197		134.23	5.54859		134.23	0.47924
132.293	25.8063		132.293	20.5985		132.293	15.5603		132.293	10.5873		132.293	5.56065		132.293	0.50228
130.355	25.9136		130.355	20.6612		130.355	15.4947		130.355	10.6061		130.355	5.54834		130.355	0.49754
128.418	25.8596		128.418	20.6875		128.418	15.5389		128.418	10.5816		128.418	5.56852		128.418	0.52982
126.479	25.8888		126.479	20.6972		126.479	15.5219		126.479	10.6058		126.479	5.59479		126.479	0.54127
124.541	25.9032		124.541	20.664		124.541	15.5302		124.541	10.5786		124.541	5.58045		124.541	0.51802
122.602	25.8639		122.602	20.6375		122.602	15.5343		122.602	10.5812		122.602	5.59655		122.602	0.5364
120.662	25.8393		120.662	20.6703		120.662	15.5764		120.662	10.6135		120.662	5.59844		120.662	0.50623
118.721	25.9123		118.721	20.6702		118.721	15.5573		118.721	10.6269		118.721	5.58006		118.721	0.54541
116.781	25.8682		116.781	20.6106		116.781	15.5255		116.781	10.5808		116.781	5.6367		116.781	0.46673
114.84	25.8095		114.84	20.594		114.84	15.5106		114.84	10.5672		114.84	5.58182		114.84	0.51744
112.898	25.8874		112.898	20.7522		112.898	15.5612		112.898	10.6373		112.898	5.64047		112.898	0.5589
110.957	26.0041		110.957	20.8609		110.957	15.6201		110.957	10.7424		110.957	5.7072		110.957	0.64882
109.014	25.9942		109.014	20.7882		109.014	15.5904		109.014	10.7315		109.014	5.65842		109.014	0.58866
107.072	25.9598		107.072	20.7056		107.072	15.5439		107.072	10.6341		107.072	5.59548		107.072	0.51467
105.129	25.7794		105.129	20.6131		105.129	15.5227		105.129	10.5153		105.129	5.57712		105.129	0.49379
103.186	25.8133		103.186	20.6789		103.186	15.4889		103.186	10.5449		103.186	5.57497		103.186	0.47291
101.24	25.8813		101.24	20.7413		101.24	15.5688		101.24	10.6472		101.24	5.56472		101.24	0.52124

## Sheet: Fig3A
Mean NS thickness	std dev	Network resistivity	error
nm	nm	Ohm m	Ohm m
1.97476e-08	7.28355e-09	0.000690893	6.90893e-05
1.15555e-08	5.52042e-09	0.000510846	5.10846e-05
9.56393e-09	4.01063e-09	0.000461612	4.61612e-05
6.22082e-09	2.11313e-09	0.000286637	2.86637e-05
4.92481e-09	1.83221e-09	0.000206462	2.06462e-05
3.24142e-09	1.16365e-09	0.000181285	1.81285e-05

## Sheet: Fig3B
Strain	DR/R0	Strain	DR/R0	Strain	DR/R0	Strain	DR/R0	Strain	DR/R0	Strain	DR/R0	Strain	DR/R0
%		%		%		%		%		%		%
0 to 0.5 k	0 to 0.5 k	0.5 to 1 k	0.5 to 1 k	1 to 1.5 k	1 to 1.5 k	1.5 to 2 k	1.5 to 2 k	2 to 3 k	2 to 3 k	3 to 4 k	3 to 4 k	4 to 6 k	4 to 6 k
0	0	0.002	0	0.002	0	0.004	0	0	0	0.004	0	0.002	0
0.024	0.00565	0.026	0.00287	0.026	0.00228	0.028	0.00127	0.024	0.000960084	0.028	0.000815488	0.026	0.000672752
0.048	0.01322	0.05	0.00834	0.05	0.00688	0.052	0.00432	0.048	0.00193	0.052	0.00268	0.05	0.00179
0.072	0.01597	0.074	0.00996	0.074	0.00827	0.076	0.0048	0.072	0.00378	0.076	0.00353	0.074	0.00237
0.096	0.02052	0.098	0.01356	0.098	0.01089	0.1	0.007	0.096	0.00521	0.1	0.00475	0.098	0.00337
0.12	0.0245	0.122	0.01737	0.122	0.01367	0.124	0.00923	0.12	0.00637	0.124	0.0063	0.122	0.00433
0.144	0.02713	0.146	0.02085	0.146	0.01634	0.148	0.01019	0.15	0.00814	0.148	0.00742	0.146	0.00537
0.168	0.03022	0.17	0.02379	0.17	0.01924	0.172	0.0127	0.174	0.00971	0.172	0.009	0.17	0.00634
0.192	0.03404	0.194	0.02689	0.194	0.02176	0.196	0.01493	0.198	0.01132	0.196	0.01054	0.194	0.00729
0.216	0.03717	0.218	0.03067	0.218	0.02495	0.22	0.01621	0.222	0.01303	0.22	0.01193	0.218	0.00839
0.24	0.03989	0.242	0.0344	0.242	0.02828	0.244	0.01863	0.246	0.01419	0.244	0.01321	0.242	0.00953
0.264	0.04369	0.266	0.03748	0.266	0.03086	0.268	0.02096	0.27	0.01595	0.268	0.01459	0.266	0.01064
0.288	0.04748	0.29	0.04157	0.29	0.03405	0.292	0.02278	0.294	0.01756	0.292	0.01613	0.29	0.01184
0.312	0.0506	0.314	0.04607	0.314	0.0372	0.316	0.02514	0.318	0.01908	0.316	0.01766	0.32	0.01333
0.336	0.05407	0.338	0.04896	0.338	0.03995	0.34	0.02747	0.342	0.02092	0.34	0.01923	0.344	0.01427
0.36	0.05679	0.362	0.0521	0.362	0.04308	0.364	0.02925	0.366	0.02251	0.364	0.02081	0.368	0.01537
0.384	0.06189	0.386	0.05651	0.398	0.04793	0.388	0.03164	0.39	0.0241	0.388	0.02246	0.392	0.01655
0.408	0.06512	0.41	0.06014	0.422	0.05111	0.412	0.03423	0.414	0.02575	0.412	0.02394	0.416	0.01773
0.432	0.07049	0.434	0.06301	0.446	0.05447	0.436	0.03557	0.438	0.02758	0.436	0.02577	0.44	0.01881
0.456	0.07593	0.458	0.06723	0.47	0.05667	0.46	0.03813	0.462	0.02908	0.46	0.02735	0.464	0.02005

## Sheet: Fig3C
G	Count	G	Count	G	Count	G	Count	G	Count	G	Count
	4-6k		3-4k		2-3k		1.5-2k		1-1.5k		0.5-1k
3.35	1	4.55	0	4.875	2	6.55	1	8.95	7	10.45	5
3.37	1	4.57	2	4.925	5	6.65	2	9.05	28	10.55	34
3.39	1	4.59	0	4.975	9	6.75	7	9.15	29	10.65	25
3.41	10	4.61	4	5.025	11	6.85	12	9.25	28	10.75	28
3.43	17	4.63	5	5.075	15	6.95	26	9.35	22	10.85	9
3.45	19	4.65	8	5.125	14	7.05	20	9.45	8	10.95	20
3.47	17	4.67	14	5.175	12	7.15	8	9.55	3	11.05	9
3.49	7	4.69	15	5.225	6	7.25	8	9.65	1	11.15	8
3.51	8	4.71	21	5.275	8	7.35	5	9.75	0	11.25	1
3.53	4	4.73	14	5.325	2	7.45	1			11.35	0
3.55	0	4.75	5	5.375	1
3.57	2	4.77	10	5.425	0
3.59	0	4.79	4	5.475	1
		4.81	2	5.525	1
		4.83	3

## Sheet: Fig3D
Mean nanosheet thickness	std dev	G	std dev
nm	nm
1.97476e-08	7.28355e-09	10.7516	0.19532
1.15555e-08	5.52042e-09	9.20571	0.14409
9.56393e-09	4.01063e-09	7.00257	0.17252
6.22082e-09	2.11313e-09	5.11665	0.12338
4.92481e-09	1.83221e-09	4.70641	0.05347
3.24142e-09	1.16365e-09	3.45821	0.04056
